# Supplementary material for: Mechanism and kinetic study on the ring-opening degradation of 2,3,7,8-tetrachlorinated dibenzofuran initiated by OH radicals in waste incineration
Source: Royal Society of Chemistry journal article supplement (doi:10.1039/c5ra13804c), 2015-01-01
Supplement: c5ra13804c1.pdf [file c5ra13804c1.pdf]

## **Mechanism and kinetic study on the ring-opening degradation of 2,3,7,8-Tetrachlorinated Dibenzofuran initiated by OH radical in waste incineration**

Kun Zhang<sup>(a)</sup>, Shengmin Sun<sup>(b)</sup>, Hui Zhang<sup>(a)\*</sup>

<sup>(a)</sup>College of Chemical and Environmental Engineering, Harbin University of Science and Technology, Harbin 150080, P. R. China

<sup>(b)</sup>College of Food Engineering, Harbin University of Commerce, Harbin 150076, P. R. China

Scheme S1. The reactions of 2,3,7,8-TCDF initiated by the OH radical addition to carbon site 1

Scheme S2. The reactions of 2,3,7,8-TCDF initiated by the OH radical addition to carbon site 2

Scheme S3. The dechlorination reactions of 2,3,7,8-TCDF initiated by the OH radical addition to carbon site 3 and site 4

Scheme S4. The reactions of 2,3,7,8-TCDF initiated by the OH radical addition to carbon site 5

Scheme S5. The reactions of 2,3,7,8-TCDF initiated by the OH radical addition to carbon site 6

Table S1. The geometry coordinates of all species optimized at B3LYP/6-311+G(d,p) level

2,3,7,8-TCDF:

|    |              |              |              |
|----|--------------|--------------|--------------|
| C  | 0.773746000  | 0.000014000  | 3.053694000  |
| C  | 1.173416000  | 0.000009000  | 1.720749000  |
| C  | 0.198196000  | 0.000002000  | 0.724960000  |
| C  | -1.156112000 | 0.000001000  | 1.096279000  |
| C  | -1.580503000 | 0.000002000  | 2.411356000  |
| C  | -0.593350000 | 0.000012000  | 3.396443000  |
| H  | 2.229041000  | 0.000012000  | 1.481972000  |
| H  | -2.629385000 | -0.000001000 | 2.674543000  |
| C  | -1.156112000 | 0.000001000  | -1.096279000 |
| C  | 0.198196000  | 0.000002000  | -0.724960000 |
| C  | -1.580503000 | 0.000002000  | -2.411356000 |
| C  | 1.173416000  | 0.000009000  | -1.720749000 |
| C  | -0.593350000 | 0.000012000  | -3.396443000 |
| H  | -2.629385000 | -0.000001000 | -2.674543000 |
| C  | 0.773746000  | 0.000014000  | -3.053694000 |
| H  | 2.229041000  | 0.000012000  | -1.481972000 |
| O  | -1.984392000 | -0.000020000 | 0.000000000  |
| Cl | -1.100428000 | -0.000001000 | 5.065665000  |
| Cl | 2.008991000  | -0.000008000 | 4.290582000  |
| Cl | -1.100428000 | -0.000001000 | -5.065665000 |
| Cl | 2.008991000  | -0.000008000 | -4.290582000 |

OH:

|   |             |             |              |
|---|-------------|-------------|--------------|
| O | 0.000000000 | 0.000000000 | 0.108429000  |
| H | 0.000000000 | 0.000000000 | -0.867431000 |

RC1:

|   |             |              |              |
|---|-------------|--------------|--------------|
| C | 3.205002000 | 0.805897000  | 0.052721000  |
| C | 1.883696000 | 1.241037000  | 0.080345000  |
| C | 0.864549000 | 0.302952000  | -0.072783000 |
| C | 1.201746000 | -1.047892000 | -0.249490000 |
| C | 2.504022000 | -1.507423000 | -0.281725000 |
| C | 3.512855000 | -0.557477000 | -0.126253000 |
| H | 1.672478000 | 2.293095000  | 0.220148000  |
| H | 2.738865000 | -2.554092000 | -0.416882000 |

|    |              |              |              |
|----|--------------|--------------|--------------|
| C  | -0.984703000 | -0.992342000 | -0.287896000 |
| C  | -0.584474000 | 0.340418000  | -0.102057000 |
| C  | -2.315376000 | -1.384290000 | -0.356978000 |
| C  | -1.557469000 | 1.331008000  | 0.004373000  |
| C  | -3.278574000 | -0.369349000 | -0.267900000 |
| H  | -2.599305000 | -2.409950000 | -0.538822000 |
| C  | -2.902469000 | 0.971312000  | -0.078745000 |
| H  | -1.295491000 | 2.370807000  | 0.150757000  |
| O  | 0.083039000  | -1.835763000 | -0.387097000 |
| Cl | 5.168254000  | -1.107065000 | -0.158838000 |
| Cl | 4.472696000  | 1.994184000  | 0.247355000  |
| Cl | -4.956146000 | -0.825040000 | -0.396329000 |
| Cl | -4.104906000 | 2.233198000  | 0.053285000  |
| O  | -2.179223000 | -2.154966000 | 1.975746000  |
| H  | -2.898153000 | -1.596835000 | 2.320901000  |

TS1:

|    |              |              |              |
|----|--------------|--------------|--------------|
| C  | 3.118162000  | 0.825704000  | -0.002211000 |
| C  | 1.792713000  | 1.230033000  | 0.105805000  |
| C  | 0.787829000  | 0.265021000  | 0.038460000  |
| C  | 1.140916000  | -1.083844000 | -0.142780000 |
| C  | 2.448690000  | -1.511453000 | -0.251167000 |
| C  | 3.443039000  | -0.535034000 | -0.179446000 |
| H  | 1.564528000  | 2.278574000  | 0.245128000  |
| H  | 2.699948000  | -2.554485000 | -0.383939000 |
| C  | -1.038887000 | -1.097379000 | 0.049752000  |
| C  | -0.652238000 | 0.281506000  | 0.084246000  |
| C  | -2.374370000 | -1.477052000 | -0.203734000 |
| C  | -1.631838000 | 1.264295000  | 0.077323000  |
| C  | -3.330634000 | -0.481029000 | -0.214337000 |
| H  | -2.637360000 | -2.517694000 | -0.328928000 |
| C  | -2.966973000 | 0.882860000  | -0.057197000 |
| H  | -1.383743000 | 2.315846000  | 0.135987000  |
| O  | 0.040016000  | -1.898375000 | -0.219606000 |
| Cl | 5.103019000  | -1.047751000 | -0.313298000 |
| Cl | 4.368869000  | 2.043422000  | 0.089171000  |
| Cl | -5.001153000 | -0.936614000 | -0.435712000 |
| Cl | -4.181181000 | 2.130687000  | -0.063321000 |
| O  | -1.026455000 | -1.502604000 | 2.017095000  |
| H  | -1.692738000 | -0.921823000 | 2.417259000  |

IM1:

|   |             |             |             |
|---|-------------|-------------|-------------|
| C | 3.090577000 | 0.825204000 | 0.015736000 |
|---|-------------|-------------|-------------|

|    |              |              |              |
|----|--------------|--------------|--------------|
| C  | 1.778260000  | 1.210291000  | 0.267462000  |
| C  | 0.776277000  | 0.238237000  | 0.278717000  |
| C  | 1.113038000  | -1.108236000 | 0.025363000  |
| C  | 2.406765000  | -1.508549000 | -0.238197000 |
| C  | 3.401025000  | -0.524543000 | -0.236747000 |
| H  | 1.555710000  | 2.252537000  | 0.455606000  |
| H  | 2.651046000  | -2.542495000 | -0.438577000 |
| C  | -1.067297000 | -1.181348000 | 0.553892000  |
| C  | -0.650603000 | 0.266799000  | 0.412812000  |
| C  | -2.381049000 | -1.484464000 | -0.081057000 |
| C  | -1.601446000 | 1.254153000  | 0.284497000  |
| C  | -3.281906000 | -0.482035000 | -0.237154000 |
| H  | -2.631471000 | -2.517549000 | -0.281080000 |
| C  | -2.930588000 | 0.894162000  | 0.021474000  |
| H  | -1.335379000 | 2.304034000  | 0.290875000  |
| O  | 0.029268000  | -1.937462000 | 0.020511000  |
| Cl | 5.039597000  | -1.021149000 | -0.557749000 |
| Cl | 4.335860000  | 2.052767000  | 0.020415000  |
| Cl | -4.895294000 | -0.868371000 | -0.797528000 |
| Cl | -4.119023000 | 2.150858000  | -0.104356000 |
| O  | -1.088738000 | -1.576429000 | 1.937752000  |
| H  | -1.821849000 | -1.123224000 | 2.372996000  |

TS1-a:

|    |              |              |              |
|----|--------------|--------------|--------------|
| C  | -2.872011000 | 0.919129000  | -0.037436000 |
| C  | -1.539621000 | 1.088602000  | -0.400806000 |
| C  | -0.736149000 | -0.045565000 | -0.545915000 |
| C  | -1.296223000 | -1.306263000 | -0.291201000 |
| C  | -2.603767000 | -1.503456000 | 0.092409000  |
| C  | -3.402433000 | -0.362818000 | 0.209234000  |
| H  | -1.150501000 | 2.085029000  | -0.562947000 |
| H  | -3.003953000 | -2.488194000 | 0.290002000  |
| C  | 0.806765000  | -1.672126000 | -0.783379000 |
| C  | 0.647612000  | -0.279175000 | -0.869013000 |
| C  | 2.302595000  | -1.299731000 | 0.993485000  |
| C  | 1.709572000  | 0.666065000  | -1.106439000 |
| C  | 3.090450000  | -0.277013000 | 0.727014000  |
| H  | 2.293273000  | -2.043778000 | 1.775494000  |
| C  | 2.875451000  | 0.628015000  | -0.415681000 |
| H  | 1.551595000  | 1.464708000  | -1.823023000 |
| O  | -0.352484000 | -2.295393000 | -0.458414000 |
| Cl | -5.070927000 | -0.575942000 | 0.672019000  |
| Cl | -3.872986000 | 2.344128000  | 0.119218000  |

|    |             |              |              |
|----|-------------|--------------|--------------|
| Cl | 4.412709000 | 0.133666000  | 1.866003000  |
| Cl | 4.138236000 | 1.759019000  | -0.848952000 |
| O  | 1.672594000 | -2.516778000 | -1.345310000 |
| H  | 2.535703000 | -2.089209000 | -1.424273000 |

IM1-a:

|    |              |              |              |
|----|--------------|--------------|--------------|
| C  | 3.089455000  | 0.824840000  | 0.008732000  |
| C  | 1.710969000  | 1.025440000  | 0.055994000  |
| C  | 0.869835000  | -0.086421000 | 0.030280000  |
| C  | 1.448927000  | -1.356670000 | -0.036956000 |
| C  | 2.805998000  | -1.591082000 | -0.085008000 |
| C  | 3.636114000  | -0.469295000 | -0.060266000 |
| H  | 1.327598000  | 2.035804000  | 0.113948000  |
| H  | 3.216299000  | -2.589947000 | -0.138143000 |
| C  | -0.715384000 | -1.665532000 | 0.007446000  |
| C  | -0.573704000 | -0.290723000 | 0.056656000  |
| C  | -3.833537000 | -0.946107000 | 1.524805000  |
| C  | -1.522626000 | 0.794839000  | 0.055534000  |
| C  | -3.829765000 | -0.203776000 | 0.448630000  |
| H  | -4.408770000 | -1.714068000 | 2.015190000  |
| C  | -2.867458000 | 0.864038000  | 0.163017000  |
| H  | -1.048301000 | 1.761093000  | -0.085918000 |
| O  | 0.465948000  | -2.321104000 | -0.047801000 |
| Cl | 5.363970000  | -0.722775000 | -0.115841000 |
| Cl | 4.127000000  | 2.233375000  | 0.041106000  |
| Cl | -5.130079000 | -0.459815000 | -0.780489000 |
| Cl | -3.629385000 | 2.450043000  | -0.005433000 |
| O  | -1.750997000 | -2.479960000 | -0.018882000 |
| H  | -2.554977000 | -1.995762000 | 0.246371000  |

TS1-a-1 :

|   |              |              |              |
|---|--------------|--------------|--------------|
| C | 3.076819000  | 0.847949000  | 0.011417000  |
| C | 1.692634000  | 1.001389000  | 0.066054000  |
| C | 0.888734000  | -0.137493000 | 0.037920000  |
| C | 1.509015000  | -1.386561000 | -0.040336000 |
| C | 2.872372000  | -1.575498000 | -0.099823000 |
| C | 3.665434000  | -0.427006000 | -0.070254000 |
| H | 1.276387000  | 1.998524000  | 0.128151000  |
| H | 3.314838000  | -2.559971000 | -0.162865000 |
| C | -0.647218000 | -1.777999000 | 0.004139000  |
| C | -0.548654000 | -0.388866000 | 0.064474000  |
| C | -3.779028000 | -1.310233000 | 1.125189000  |

|    |              |              |              |
|----|--------------|--------------|--------------|
| C  | -1.515088000 | 0.664596000  | 0.115903000  |
| C  | -3.889775000 | -0.273741000 | 0.312732000  |
| H  | -4.496780000 | -2.010996000 | 1.528015000  |
| C  | -2.875964000 | 0.758938000  | 0.150964000  |
| H  | -1.039267000 | 1.639863000  | 0.086587000  |
| O  | 0.560151000  | -2.385669000 | -0.053281000 |
| Cl | 5.399455000  | -0.622793000 | -0.134200000 |
| Cl | 4.066710000  | 2.289452000  | 0.048431000  |
| Cl | -5.378124000 | -0.125483000 | -0.673897000 |
| Cl | -3.531594000 | 2.401464000  | 0.085247000  |
| O  | -1.652694000 | -2.602910000 | -0.016481000 |
| H  | -2.470102000 | -2.156520000 | 0.373066000  |

P1-a-1:

|    |              |              |              |
|----|--------------|--------------|--------------|
| C  | 3.083404000  | 0.818196000  | 0.034875000  |
| C  | 1.714793000  | 1.046903000  | -0.001837000 |
| C  | 0.844739000  | -0.047405000 | -0.104553000 |
| C  | 1.384739000  | -1.349635000 | -0.156185000 |
| C  | 2.738085000  | -1.600428000 | -0.113992000 |
| C  | 3.593753000  | -0.496484000 | -0.019079000 |
| H  | 1.344810000  | 2.062524000  | 0.052226000  |
| H  | 3.132104000  | -2.606331000 | -0.154806000 |
| C  | -0.839376000 | -1.634757000 | -0.277977000 |
| C  | -0.574891000 | -0.184720000 | -0.142997000 |
| C  | -3.425819000 | -0.678373000 | 1.839228000  |
| C  | -1.503975000 | 0.883203000  | -0.187112000 |
| C  | -3.669051000 | -0.168927000 | 0.634119000  |
| H  | -4.046141000 | -1.458878000 | 2.258870000  |
| C  | -2.852893000 | 0.887341000  | 0.029820000  |
| H  | -1.074735000 | 1.848458000  | -0.440330000 |
| O  | 0.412826000  | -2.296685000 | -0.251953000 |
| Cl | 5.306453000  | -0.794417000 | 0.030795000  |
| Cl | 4.156129000  | 2.191791000  | 0.157620000  |
| Cl | -5.054629000 | -0.705466000 | -0.306365000 |
| Cl | -3.717029000 | 2.370096000  | -0.342851000 |
| O  | -1.847199000 | -2.257449000 | -0.436800000 |
| H  | -2.587811000 | -0.316242000 | 2.421818000  |

TS1-a-2 :

|   |             |             |              |
|---|-------------|-------------|--------------|
| C | 3.010319000 | 0.785579000 | -0.139060000 |
| C | 1.704276000 | 1.059461000 | -0.555485000 |
| C | 0.786642000 | 0.018644000 | -0.622597000 |



|    |              |              |              |
|----|--------------|--------------|--------------|
| C  | 1.206125000  | -1.262756000 | -0.240134000 |
| C  | 2.477820000  | -1.567811000 | 0.180940000  |
| C  | 3.396259000  | -0.512360000 | 0.226008000  |
| H  | 1.435508000  | 2.073227000  | -0.821570000 |
| H  | 2.764383000  | -2.570069000 | 0.467819000  |
| C  | -0.887290000 | -1.500243000 | -0.817728000 |
| C  | -0.651282000 | -0.086344000 | -0.922788000 |
| C  | -2.613056000 | -0.758456000 | 1.847582000  |
| C  | -1.610275000 | 0.994657000  | -0.647036000 |
| C  | -3.236323000 | -0.205271000 | 0.846773000  |
| H  | -2.703021000 | -1.550801000 | 2.570521000  |
| C  | -2.739885000 | 0.943560000  | 0.074142000  |
| H  | -1.358547000 | 1.947580000  | -1.101383000 |
| O  | 0.167666000  | -2.194482000 | -0.366651000 |
| Cl | 5.022261000  | -0.863891000 | 0.751306000  |
| Cl | 4.149336000  | 2.109305000  | -0.083963000 |
| Cl | -4.837125000 | -0.852677000 | 0.345764000  |
| Cl | -3.758096000 | 2.380646000  | 0.162781000  |
| O  | -1.857904000 | -2.016956000 | -1.447855000 |
| H  | -1.474777000 | -0.807910000 | -1.973132000 |

P1-a-2:

|    |              |              |              |
|----|--------------|--------------|--------------|
| C  | 2.711565000  | 0.792132000  | -0.195114000 |
| C  | 1.478187000  | 1.019346000  | -0.815363000 |
| C  | 0.599763000  | -0.038035000 | -0.966892000 |
| C  | 0.956947000  | -1.300479000 | -0.504213000 |
| C  | 2.164232000  | -1.560578000 | 0.110803000  |
| C  | 3.049754000  | -0.488360000 | 0.261965000  |
| H  | 1.232929000  | 2.016697000  | -1.157520000 |
| H  | 2.422643000  | -2.549128000 | 0.464434000  |
| C  | -1.126063000 | -1.628257000 | -1.300144000 |
| C  | -0.765347000 | -0.154763000 | -1.603763000 |
| C  | -1.368628000 | -0.255046000 | 1.674785000  |
| C  | -1.805990000 | 0.880061000  | -1.247020000 |
| C  | -2.457070000 | -0.007696000 | 1.001685000  |
| H  | -1.000662000 | -0.841447000 | 2.499154000  |
| C  | -2.542642000 | 0.926615000  | -0.134517000 |
| H  | -1.960072000 | 1.663162000  | -1.980164000 |
| O  | -0.024807000 | -2.245170000 | -0.714388000 |
| Cl | 4.581238000  | -0.795954000 | 1.038750000  |
| Cl | 3.806654000  | 2.140521000  | -0.008208000 |
| Cl | -3.979948000 | -0.832926000 | 1.453130000  |
| Cl | -3.716214000 | 2.222982000  | 0.063157000  |

|   |              |              |              |
|---|--------------|--------------|--------------|
| O | -2.121527000 | -2.224903000 | -1.550594000 |
| H | -0.651850000 | -0.126949000 | -2.695423000 |

TS1-b:

|    |              |              |              |
|----|--------------|--------------|--------------|
| C  | 3.154092000  | 0.773299000  | 0.217416000  |
| C  | 1.902355000  | 1.229747000  | 0.632104000  |
| C  | 0.762696000  | 0.457000000  | 0.393802000  |
| C  | 0.925528000  | -0.782627000 | -0.249900000 |
| C  | 2.145685000  | -1.242224000 | -0.686394000 |
| C  | 3.276158000  | -0.451085000 | -0.448669000 |
| H  | 1.821788000  | 2.191104000  | 1.121440000  |
| H  | 2.233705000  | -2.195916000 | -1.188531000 |
| C  | -1.083230000 | -1.560890000 | 0.598325000  |
| C  | -0.605826000 | 0.763134000  | 0.627158000  |
| C  | -2.455390000 | -1.413331000 | 0.589006000  |
| C  | -1.677201000 | 1.509154000  | 0.371463000  |
| C  | -3.258976000 | -0.387782000 | 0.013865000  |
| H  | -2.994987000 | -2.114829000 | 1.222176000  |
| C  | -2.930427000 | 0.945031000  | -0.071019000 |
| H  | -1.655096000 | 2.598626000  | 0.451465000  |
| O  | -0.247713000 | -1.495049000 | -0.479350000 |
| Cl | 4.824833000  | -1.046401000 | -0.982628000 |
| Cl | 4.550509000  | 1.773584000  | 0.540876000  |
| Cl | -4.902738000 | -0.902441000 | -0.347693000 |
| Cl | -4.088449000 | 2.120332000  | -0.659690000 |
| O  | -0.485662000 | -2.297895000 | 1.569779000  |
| H  | -1.001809000 | -2.238255000 | 2.382394000  |

IM1-b:

|   |              |              |              |
|---|--------------|--------------|--------------|
| C | 3.098610000  | 0.780269000  | 0.134232000  |
| C | 1.919650000  | 1.346541000  | 0.598984000  |
| C | 0.688414000  | 0.667231000  | 0.517301000  |
| C | 0.705408000  | -0.622553000 | -0.057303000 |
| C | 1.874975000  | -1.196346000 | -0.520040000 |
| C | 3.080186000  | -0.502602000 | -0.426020000 |
| H | 1.943788000  | 2.336390000  | 1.034813000  |
| H | 1.842106000  | -2.181481000 | -0.965269000 |
| C | -1.233702000 | -1.744680000 | 0.728676000  |
| C | -0.486259000 | 1.291793000  | 1.019793000  |
| C | -2.522300000 | -1.407855000 | 0.873000000  |
| C | -1.779392000 | 1.528183000  | 1.032702000  |

|    |              |              |              |
|----|--------------|--------------|--------------|
| C  | -3.168211000 | -0.345379000 | 0.107715000  |
| H  | -3.138891000 | -1.971775000 | 1.566125000  |
| C  | -2.816493000 | 0.952393000  | 0.141297000  |
| H  | -2.172594000 | 2.250078000  | 1.752876000  |
| O  | -0.484005000 | -1.290184000 | -0.304260000 |
| Cl | 4.530575000  | -1.263313000 | -1.016471000 |
| Cl | 4.579928000  | 1.694422000  | 0.268462000  |
| Cl | -4.560763000 | -0.881326000 | -0.833578000 |
| Cl | -3.687737000 | 2.173529000  | -0.772585000 |
| O  | -0.546347000 | -2.630508000 | 1.485692000  |
| H  | -1.050966000 | -2.845961000 | 2.278901000  |

TS1-b-1 :

|    |              |              |              |
|----|--------------|--------------|--------------|
| C  | 3.103656000  | 0.757431000  | 0.102862000  |
| C  | 1.913700000  | 1.300900000  | 0.565048000  |
| C  | 0.708445000  | 0.567156000  | 0.538740000  |
| C  | 0.778180000  | -0.741643000 | 0.002420000  |
| C  | 1.952225000  | -1.296970000 | -0.454190000 |
| C  | 3.132184000  | -0.552094000 | -0.398114000 |
| H  | 1.908184000  | 2.305280000  | 0.966482000  |
| H  | 1.951765000  | -2.293334000 | -0.875151000 |
| C  | -1.248961000 | -1.723318000 | 0.735521000  |
| C  | -0.481713000 | 1.088826000  | 1.080793000  |
| C  | -2.667341000 | -1.530902000 | 0.710279000  |
| C  | -1.777628000 | 1.270411000  | 1.174342000  |
| C  | -3.241305000 | -0.379481000 | 0.008555000  |
| H  | -3.232898000 | -2.458215000 | 0.668624000  |
| C  | -2.803325000 | 0.886820000  | 0.161502000  |
| H  | -2.182868000 | 1.751916000  | 2.068657000  |
| O  | -0.422167000 | -1.410041000 | -0.249137000 |
| Cl | 4.603017000  | -1.279913000 | -0.972089000 |
| Cl | 4.549626000  | 1.730962000  | 0.170283000  |
| Cl | -4.604845000 | -0.730871000 | -1.049829000 |
| Cl | -3.511161000 | 2.247473000  | -0.685031000 |
| O  | -0.853426000 | -2.185739000 | 1.855763000  |
| H  | -2.070968000 | -1.872291000 | 2.075164000  |

P1-b-1:

|   |             |              |             |
|---|-------------|--------------|-------------|
| C | 3.040724000 | 0.747600000  | 0.087879000 |
| C | 1.873408000 | 1.284595000  | 0.608285000 |
| C | 0.675590000 | 0.539535000  | 0.644678000 |
| C | 0.713280000 | -0.779246000 | 0.117458000 |

|    |              |              |              |
|----|--------------|--------------|--------------|
| C  | 1.875728000  | -1.322795000 | -0.388649000 |
| C  | 3.049379000  | -0.566229000 | -0.403441000 |
| H  | 1.879882000  | 2.291827000  | 1.002604000  |
| H  | 1.866783000  | -2.325135000 | -0.794945000 |
| C  | -1.284203000 | -1.711525000 | 1.046277000  |
| C  | -0.494968000 | 1.045377000  | 1.232573000  |
| C  | -2.737450000 | -1.647816000 | 0.625379000  |
| C  | -1.798255000 | 1.180238000  | 1.302880000  |
| C  | -3.154746000 | -0.379884000 | -0.099179000 |
| H  | -2.913007000 | -2.495084000 | -0.042653000 |
| C  | -2.748099000 | 0.861274000  | 0.198900000  |
| H  | -2.256801000 | 1.566196000  | 2.215364000  |
| O  | -0.473222000 | -1.463172000 | -0.046240000 |
| Cl | 4.494661000  | -1.288656000 | -1.047995000 |
| Cl | 4.482660000  | 1.731251000  | 0.071809000  |
| Cl | -4.340695000 | -0.662520000 | -1.358924000 |
| Cl | -3.376449000 | 2.274257000  | -0.628778000 |
| O  | -0.865583000 | -1.994862000 | 2.127778000  |
| H  | -3.351749000 | -1.803919000 | 1.515182000  |

TS1-b-2 :

|    |              |              |              |
|----|--------------|--------------|--------------|
| C  | 2.833342000  | 0.547779000  | 0.283971000  |
| C  | 1.732774000  | 0.917673000  | 1.039830000  |
| C  | 0.533183000  | 0.190023000  | 0.984534000  |
| C  | 0.490552000  | -0.947347000 | 0.143755000  |
| C  | 1.591053000  | -1.325376000 | -0.613696000 |
| C  | 2.763618000  | -0.584120000 | -0.546390000 |
| H  | 1.799426000  | 1.780163000  | 1.689714000  |
| H  | 1.521864000  | -2.189426000 | -1.260655000 |
| C  | -1.584873000 | -1.713088000 | 0.985777000  |
| C  | -0.608520000 | 0.502571000  | 1.815204000  |
| C  | -2.881588000 | -1.320177000 | 0.688173000  |
| C  | -1.848394000 | 0.925767000  | 1.519925000  |
| C  | -3.052043000 | -0.199584000 | -0.239460000 |
| H  | -3.697963000 | -1.646562000 | 1.322712000  |
| C  | -2.438202000 | 0.942964000  | 0.137756000  |
| H  | -2.571334000 | 1.062070000  | 2.323177000  |
| O  | -0.684018000 | -1.628306000 | -0.059473000 |
| Cl | 4.123374000  | -1.085054000 | -1.512283000 |
| Cl | 4.287570000  | 1.507553000  | 0.389081000  |
| Cl | -4.074981000 | -0.336997000 | -1.648916000 |
| Cl | -2.396300000 | 2.407750000  | -0.792654000 |
| O  | -1.111207000 | -1.903916000 | 2.165395000  |

|   |              |              |             |
|---|--------------|--------------|-------------|
| H | -0.849876000 | -0.756262000 | 2.482529000 |
|---|--------------|--------------|-------------|

P1-b-2:

|    |              |              |              |
|----|--------------|--------------|--------------|
| C  | 3.191068000  | 0.698875000  | 0.184387000  |
| C  | 2.046361000  | 1.354719000  | 0.620910000  |
| C  | 0.768793000  | 0.804249000  | 0.438898000  |
| C  | 0.701067000  | -0.449326000 | -0.180243000 |
| C  | 1.824526000  | -1.123584000 | -0.618481000 |
| C  | 3.081958000  | -0.546743000 | -0.444979000 |
| H  | 2.151478000  | 2.319246000  | 1.101874000  |
| H  | 1.725026000  | -2.094166000 | -1.084637000 |
| C  | -1.101540000 | -1.697135000 | 0.698084000  |
| C  | -0.389656000 | 1.574132000  | 0.887174000  |
| C  | -2.551448000 | -1.597954000 | 0.668971000  |
| C  | -1.726256000 | 1.564499000  | 0.658723000  |
| C  | -3.228120000 | -0.518976000 | 0.159796000  |
| H  | -3.098804000 | -2.444574000 | 1.059351000  |
| C  | -2.729362000 | 0.790778000  | -0.079158000 |
| H  | -2.217698000 | 2.445140000  | 1.073786000  |
| O  | -0.558080000 | -0.976998000 | -0.362214000 |
| Cl | 4.484173000  | -1.409765000 | -1.009873000 |
| Cl | 4.742232000  | 1.459372000  | 0.436090000  |
| Cl | -4.953216000 | -0.796591000 | -0.115495000 |
| Cl | -3.676012000 | 1.846312000  | -1.104793000 |
| O  | -0.435550000 | -2.329886000 | 1.472810000  |
| H  | -0.087321000 | 2.419642000  | 1.499560000  |

TS1-c:

|   |              |              |              |
|---|--------------|--------------|--------------|
| C | 3.129164000  | 0.813567000  | 0.048637000  |
| C | 1.815593000  | 1.197655000  | 0.295175000  |
| C | 0.813048000  | 0.229093000  | 0.283043000  |
| C | 1.143074000  | -1.114218000 | 0.012513000  |
| C | 2.440259000  | -1.512728000 | -0.251255000 |
| C | 3.435851000  | -0.533259000 | -0.225695000 |
| H | 1.593578000  | 2.236984000  | 0.499730000  |
| H | 2.683259000  | -2.544347000 | -0.464753000 |
| C | -1.049461000 | -1.178699000 | 0.518636000  |
| C | -0.622204000 | 0.259985000  | 0.401011000  |
| C | -2.429175000 | -1.518234000 | -0.014729000 |
| C | -1.557217000 | 1.230639000  | 0.249199000  |

|    |              |              |              |
|----|--------------|--------------|--------------|
| C  | -3.328758000 | -0.417296000 | -0.223664000 |
| H  | -2.518121000 | -2.416848000 | -0.620401000 |
| C  | -2.927392000 | 0.883961000  | -0.005169000 |
| H  | -1.289979000 | 2.279569000  | 0.216248000  |
| O  | 0.062032000  | -1.942563000 | -0.000538000 |
| Cl | 5.075851000  | -1.029413000 | -0.539937000 |
| Cl | 4.378167000  | 2.035937000  | 0.085374000  |
| Cl | -4.961558000 | -0.816697000 | -0.679495000 |
| Cl | -4.048452000 | 2.207549000  | -0.150272000 |
| O  | -1.388425000 | -1.609760000 | 1.810969000  |
| H  | -2.582425000 | -1.934952000 | 1.193128000  |

IM1-c:

|    |              |              |              |
|----|--------------|--------------|--------------|
| C  | 3.126506000  | 0.816577000  | -0.022963000 |
| C  | 1.798731000  | 1.206599000  | 0.130486000  |
| C  | 0.807656000  | 0.230475000  | 0.164413000  |
| C  | 1.153029000  | -1.130267000 | 0.045803000  |
| C  | 2.467363000  | -1.535027000 | -0.100719000 |
| C  | 3.453791000  | -0.545799000 | -0.137431000 |
| H  | 1.560248000  | 2.258131000  | 0.224210000  |
| H  | 2.729670000  | -2.580403000 | -0.185998000 |
| C  | -1.072183000 | -1.163493000 | 0.482741000  |
| C  | -0.632010000 | 0.278206000  | 0.242171000  |
| C  | -2.329742000 | -1.577835000 | -0.264400000 |
| C  | -1.596085000 | 1.224836000  | 0.082726000  |
| C  | -3.343775000 | -0.458717000 | -0.216027000 |
| H  | -2.107004000 | -1.826200000 | -1.309397000 |
| C  | -2.983219000 | 0.836688000  | -0.027457000 |
| H  | -1.350153000 | 2.270978000  | -0.056325000 |
| O  | 0.083658000  | -1.969152000 | 0.066219000  |
| Cl | 5.110294000  | -1.053466000 | -0.327588000 |
| Cl | 4.360908000  | 2.054176000  | -0.063360000 |
| Cl | -4.979757000 | -0.923683000 | -0.535534000 |
| Cl | -4.149384000 | 2.136196000  | -0.024550000 |
| O  | -1.209913000 | -1.076756000 | 1.810188000  |
| H  | -2.738119000 | -2.473503000 | 0.207742000  |

TS1-c-1 :

|   |             |              |             |
|---|-------------|--------------|-------------|
| C | 3.095797000 | 0.826652000  | 0.001497000 |
| C | 1.771397000 | 1.193374000  | 0.200588000 |
| C | 0.797893000 | 0.199217000  | 0.313045000 |
| C | 1.164142000 | -1.159974000 | 0.195383000 |

|    |              |              |              |
|----|--------------|--------------|--------------|
| C  | 2.481031000  | -1.538981000 | -0.020231000 |
| C  | 3.444467000  | -0.535201000 | -0.109907000 |
| H  | 1.516288000  | 2.242352000  | 0.278792000  |
| H  | 2.755668000  | -2.580533000 | -0.113123000 |
| C  | -1.060093000 | -1.226474000 | 0.695805000  |
| C  | -0.634803000 | 0.234398000  | 0.416406000  |
| C  | -2.249927000 | -1.336095000 | -0.858720000 |
| C  | -1.540912000 | 1.218012000  | 0.182572000  |
| C  | -3.255894000 | -0.357463000 | -0.540454000 |
| H  | -1.516591000 | -1.046552000 | -1.606716000 |
| C  | -2.911439000 | 0.902690000  | -0.102685000 |
| H  | -1.239723000 | 2.259893000  | 0.157155000  |
| O  | 0.129492000  | -2.019497000 | 0.282449000  |
| Cl | 5.099065000  | -1.011597000 | -0.369446000 |
| Cl | 4.305640000  | 2.082559000  | -0.109541000 |
| Cl | -4.916023000 | -0.870273000 | -0.572495000 |
| Cl | -4.088962000 | 2.159444000  | 0.132261000  |
| O  | -1.673318000 | -1.624075000 | 1.665648000  |
| H  | -2.570216000 | -2.369791000 | -0.913910000 |

P1-c-1:

|    |              |              |              |
|----|--------------|--------------|--------------|
| C  | -3.083365000 | 0.818241000  | 0.034826000  |
| C  | -1.714737000 | 1.046929000  | -0.002183000 |
| C  | -0.844768000 | -0.047409000 | -0.104966000 |
| C  | -1.384742000 | -1.349602000 | -0.156562000 |
| C  | -2.738104000 | -1.600371000 | -0.114067000 |
| C  | -3.593728000 | -0.496440000 | -0.018963000 |
| H  | -1.344779000 | 2.062575000  | 0.051609000  |
| H  | -3.132125000 | -2.606281000 | -0.154749000 |
| C  | 0.839395000  | -1.634711000 | -0.278648000 |
| C  | 0.574918000  | -0.184769000 | -0.143628000 |
| C  | 3.424201000  | -0.679229000 | 1.838688000  |
| C  | 1.503930000  | 0.883206000  | -0.187615000 |
| C  | 3.668595000  | -0.169338000 | 0.633988000  |
| H  | 2.585665000  | -0.317277000 | 2.420602000  |
| C  | 2.852860000  | 0.887299000  | 0.029515000  |
| H  | 1.074743000  | 1.848457000  | -0.440903000 |
| O  | -0.412883000 | -2.296662000 | -0.252552000 |
| Cl | -5.306437000 | -0.794372000 | 0.031359000  |
| Cl | -4.156040000 | 2.191875000  | 0.157711000  |
| Cl | 5.055384000  | -0.704819000 | -0.305082000 |
| Cl | 3.717143000  | 2.369785000  | -0.342649000 |
| O  | 1.847202000  | -2.257424000 | -0.437505000 |

|   |             |              |             |
|---|-------------|--------------|-------------|
| H | 4.044384000 | -1.459596000 | 2.258814000 |
|---|-------------|--------------|-------------|

TS1-c-2 :

|    |              |              |              |
|----|--------------|--------------|--------------|
| C  | 3.175283000  | 0.827922000  | -0.010187000 |
| C  | 1.854838000  | 1.258410000  | 0.028100000  |
| C  | 0.812993000  | 0.324445000  | -0.028237000 |
| C  | 1.125635000  | -1.050328000 | -0.096076000 |
| C  | 2.438274000  | -1.488403000 | -0.124859000 |
| C  | 3.464326000  | -0.544127000 | -0.091356000 |
| H  | 1.641376000  | 2.316739000  | 0.096146000  |
| H  | 2.662487000  | -2.545155000 | -0.171808000 |
| C  | -1.125754000 | -1.410076000 | 0.440534000  |
| C  | -0.582962000 | 0.575116000  | -0.024410000 |
| C  | -2.314825000 | -1.502183000 | -0.507219000 |
| C  | -1.635196000 | 1.358189000  | -0.183357000 |
| C  | -3.342657000 | -0.426887000 | -0.254706000 |
| H  | -1.956708000 | -1.448581000 | -1.539874000 |
| C  | -3.013719000 | 0.873180000  | -0.122428000 |
| H  | -1.504221000 | 2.416745000  | -0.413550000 |
| O  | 0.079322000  | -1.916980000 | -0.174454000 |
| Cl | 5.108961000  | -1.114410000 | -0.139839000 |
| Cl | 4.446954000  | 2.024542000  | 0.048959000  |
| Cl | -4.996457000 | -0.965156000 | -0.207491000 |
| Cl | -4.218935000 | 2.121750000  | 0.089405000  |
| O  | -1.204594000 | -1.352869000 | 1.648474000  |
| H  | -2.767070000 | -2.486845000 | -0.365450000 |

P1-c-2:

|   |              |              |              |
|---|--------------|--------------|--------------|
| C | -3.011587000 | 0.865516000  | -0.095654000 |
| C | -1.766322000 | 1.397431000  | 0.186741000  |
| C | -0.702382000 | 0.561157000  | 0.622175000  |
| C | -0.966487000 | -0.843777000 | 0.695973000  |
| C | -2.203586000 | -1.368714000 | 0.419103000  |
| C | -3.247228000 | -0.515394000 | 0.035118000  |
| H | -1.605706000 | 2.463173000  | 0.099399000  |
| H | -2.362389000 | -2.437336000 | 0.470570000  |
| C | 1.089511000  | -1.769300000 | 0.067391000  |
| C | 0.535078000  | 1.021491000  | 1.005687000  |
| C | 2.482768000  | -1.654209000 | 0.661981000  |
| C | 1.797861000  | 1.236926000  | 1.258111000  |
| C | 3.211620000  | -0.452462000 | 0.077227000  |
| H | 2.413181000  | -1.565875000 | 1.746054000  |



|    |              |              |              |
|----|--------------|--------------|--------------|
| C  | 2.912055000  | 0.824438000  | 0.365604000  |
| H  | 2.098231000  | 1.773864000  | 2.162031000  |
| O  | 0.109501000  | -1.638039000 | 1.052091000  |
| Cl | -4.805736000 | -1.210069000 | -0.298497000 |
| Cl | -4.284248000 | 1.948659000  | -0.603871000 |
| Cl | 4.522493000  | -0.852330000 | -1.005922000 |
| Cl | 3.868639000  | 2.165203000  | -0.232998000 |
| O  | 0.828955000  | -1.908268000 | -1.088222000 |
| H  | 3.041716000  | -2.556867000 | 0.416141000  |

TS1-c-3 :

|    |              |              |              |
|----|--------------|--------------|--------------|
| C  | 3.087529000  | 0.826205000  | 0.013308000  |
| C  | 1.767714000  | 1.173456000  | 0.217837000  |
| C  | 0.788023000  | 0.170947000  | 0.223607000  |
| C  | 1.150344000  | -1.203931000 | 0.044690000  |
| C  | 2.493580000  | -1.548674000 | -0.164414000 |
| C  | 3.441327000  | -0.539544000 | -0.178716000 |
| H  | 1.505175000  | 2.212752000  | 0.368648000  |
| H  | 2.781308000  | -2.581424000 | -0.303619000 |
| C  | -1.151382000 | -1.184375000 | 0.612219000  |
| C  | -0.622491000 | 0.208848000  | 0.319120000  |
| C  | -2.346498000 | -1.593109000 | -0.234912000 |
| C  | -1.565626000 | 1.204661000  | 0.152114000  |
| C  | -3.329945000 | -0.446826000 | -0.226713000 |
| H  | -2.076074000 | -1.828464000 | -1.272043000 |
| C  | -2.937862000 | 0.855472000  | -0.015764000 |
| H  | -1.288515000 | 2.247391000  | 0.048782000  |
| O  | 0.159085000  | -2.056491000 | 0.082935000  |
| Cl | 5.104146000  | -0.981114000 | -0.437445000 |
| Cl | 4.301360000  | 2.080801000  | -0.009501000 |
| Cl | -4.961236000 | -0.845207000 | -0.614378000 |
| Cl | -4.079196000 | 2.173321000  | -0.075829000 |
| O  | -1.280930000 | -1.241222000 | 1.880368000  |
| H  | -2.801673000 | -2.479951000 | 0.209163000  |

P1-c-3:

|   |             |              |              |
|---|-------------|--------------|--------------|
| C | 2.935432000 | 0.772829000  | 0.284909000  |
| C | 1.534595000 | 0.794116000  | 0.396811000  |
| C | 0.759992000 | -0.258810000 | -0.041967000 |
| C | 1.409027000 | -1.412318000 | -0.679904000 |
| C | 2.859506000 | -1.407296000 | -0.742875000 |
| C | 3.595398000 | -0.349184000 | -0.282880000 |

|    |              |              |              |
|----|--------------|--------------|--------------|
| H  | 1.074178000  | 1.651019000  | 0.872804000  |
| H  | 3.336529000  | -2.268123000 | -1.192751000 |
| C  | -1.367002000 | -1.393760000 | 0.773163000  |
| C  | -0.705704000 | -0.260379000 | 0.071141000  |
| C  | -2.873267000 | -1.534734000 | 0.575523000  |
| C  | -1.471788000 | 0.771692000  | -0.358410000 |
| C  | -3.597623000 | -0.293198000 | 0.158600000  |
| H  | -3.011637000 | -2.299896000 | -0.203371000 |
| C  | -2.921497000 | 0.787439000  | -0.273573000 |
| H  | -1.007118000 | 1.637986000  | -0.815819000 |
| O  | 0.749056000  | -2.331720000 | -1.193892000 |
| Cl | 5.336265000  | -0.387452000 | -0.405674000 |
| Cl | 3.827066000  | 2.131779000  | 0.878376000  |
| Cl | -5.330428000 | -0.360162000 | 0.221971000  |
| Cl | -3.711068000 | 2.252442000  | -0.803919000 |
| O  | -0.762149000 | -2.154425000 | 1.496812000  |
| H  | -3.300830000 | -1.952520000 | 1.489728000  |

TS1-d:

|    |              |              |              |
|----|--------------|--------------|--------------|
| C  | 3.044676000  | 0.795618000  | 0.036537000  |
| C  | 1.759672000  | 1.160901000  | 0.435427000  |
| C  | 0.764417000  | 0.193455000  | 0.468229000  |
| C  | 1.060020000  | -1.133541000 | 0.123098000  |
| C  | 2.330337000  | -1.518851000 | -0.265209000 |
| C  | 3.323878000  | -0.537167000 | -0.308404000 |
| H  | 1.560488000  | 2.189592000  | 0.707161000  |
| H  | 2.553133000  | -2.543307000 | -0.529400000 |
| C  | -1.101224000 | -1.220066000 | 0.772946000  |
| C  | -0.665388000 | 0.240978000  | 0.838170000  |
| C  | -2.381669000 | -1.521999000 | 0.083671000  |
| C  | -1.643078000 | 1.252454000  | 0.487751000  |
| C  | -3.214553000 | -0.516312000 | -0.231609000 |
| H  | -2.627379000 | -2.553367000 | -0.132479000 |
| C  | -2.860982000 | 0.888865000  | 0.014448000  |
| H  | -1.406910000 | 2.299083000  | 0.631662000  |
| O  | -0.013086000 | -1.970075000 | 0.186579000  |
| Cl | 4.924169000  | -1.017153000 | -0.805130000 |
| Cl | 4.283651000  | 2.027202000  | -0.015512000 |
| Cl | -4.752252000 | -0.881776000 | -0.979238000 |
| Cl | -4.025929000 | 2.133854000  | -0.340758000 |
| O  | -1.132241000 | -1.326565000 | 2.173254000  |
| H  | -0.717188000 | 0.018956000  | 2.104902000  |

IM1-d:

|    |              |              |              |
|----|--------------|--------------|--------------|
| C  | 2.877603000  | 0.807171000  | 0.116731000  |
| C  | 1.622050000  | 1.066106000  | 0.676850000  |
| C  | 0.700592000  | 0.039465000  | 0.770261000  |
| C  | 1.026597000  | -1.238559000 | 0.315583000  |
| C  | 2.264264000  | -1.521800000 | -0.237862000 |
| C  | 3.191654000  | -0.480645000 | -0.332639000 |
| H  | 1.398930000  | 2.066817000  | 1.025453000  |
| H  | 2.511259000  | -2.515176000 | -0.586115000 |
| C  | -1.169544000 | -1.450443000 | 0.933566000  |
| C  | -0.689516000 | -0.030895000 | 1.367442000  |
| C  | -2.221908000 | -1.482534000 | -0.147220000 |
| C  | -1.634930000 | 1.073805000  | 1.001972000  |
| C  | -2.971126000 | -0.387626000 | -0.427399000 |
| H  | -2.385550000 | -2.437453000 | -0.624044000 |
| C  | -2.703755000 | 0.902498000  | 0.206041000  |
| H  | -1.433240000 | 2.058073000  | 1.408047000  |
| O  | 0.034908000  | -2.155144000 | 0.478482000  |
| Cl | 4.750900000  | -0.835566000 | -1.034865000 |
| Cl | 4.023638000  | 2.123223000  | -0.003727000 |
| Cl | -4.209287000 | -0.509042000 | -1.636939000 |
| Cl | -3.767615000 | 2.249796000  | -0.119432000 |
| O  | -1.883320000 | -2.142255000 | 1.817589000  |
| H  | -0.615794000 | -0.055312000 | 2.462515000  |

TS1-d-1 :

|   |              |              |              |
|---|--------------|--------------|--------------|
| C | 2.569004000  | -0.821042000 | -0.377754000 |
| C | 1.320656000  | -0.811422000 | -1.009363000 |
| C | 0.539489000  | 0.326760000  | -0.932696000 |
| C | 0.998285000  | 1.434825000  | -0.225013000 |
| C | 2.224065000  | 1.455818000  | 0.411709000  |
| C | 3.015583000  | 0.306643000  | 0.322933000  |
| H | 0.990219000  | -1.692957000 | -1.543878000 |
| H | 2.564839000  | 2.323041000  | 0.960237000  |
| C | -1.109205000 | 2.030989000  | -0.808547000 |
| C | -0.802685000 | 0.685131000  | -1.528411000 |
| C | -1.960755000 | 1.284813000  | 0.940774000  |
| C | -1.891613000 | -0.351229000 | -1.504324000 |
| C | -2.548031000 | 0.116713000  | 0.828156000  |
| H | -1.774681000 | 2.009737000  | 1.714314000  |
| C | -2.668116000 | -0.611703000 | -0.447594000 |
| H | -2.056526000 | -0.910637000 | -2.416559000 |

|    |              |              |              |
|----|--------------|--------------|--------------|
| O  | 0.106063000  | 2.477824000  | -0.219866000 |
| Cl | 4.568855000  | 0.319491000  | 1.118519000  |
| Cl | 3.543268000  | -2.267505000 | -0.488145000 |
| Cl | -3.147369000 | -0.656269000 | 2.307197000  |
| Cl | -3.914140000 | -1.832494000 | -0.572915000 |
| O  | -1.987065000 | 2.826270000  | -1.074867000 |
| H  | -0.656325000 | 0.985488000  | -2.574624000 |

P1-d-1:

|    |              |              |              |
|----|--------------|--------------|--------------|
| C  | 2.184978000  | -0.534917000 | -0.700718000 |
| C  | 0.899822000  | -0.317759000 | -1.209217000 |
| C  | 0.196289000  | 0.798759000  | -0.796189000 |
| C  | 0.777838000  | 1.680683000  | 0.107215000  |
| C  | 2.041332000  | 1.499667000  | 0.629109000  |
| C  | 2.748692000  | 0.367663000  | 0.210055000  |
| H  | 0.477104000  | -1.030124000 | -1.905990000 |
| H  | 2.474187000  | 2.196828000  | 1.333073000  |
| C  | -1.250323000 | 2.596077000  | -0.255327000 |
| C  | -1.152896000 | 1.354512000  | -1.176431000 |
| C  | -1.802269000 | 0.208775000  | 2.003210000  |
| C  | -2.372645000 | 0.460025000  | -1.143629000 |
| C  | -1.950914000 | -0.669116000 | 1.054935000  |
| H  | -1.377088000 | 0.357744000  | 2.980188000  |
| C  | -2.685113000 | -0.431401000 | -0.200268000 |
| H  | -3.055105000 | 0.563129000  | -1.978623000 |
| O  | -0.050109000 | 2.738186000  | 0.429975000  |
| Cl | 4.348845000  | 0.117627000  | 0.858480000  |
| Cl | 3.055988000  | -1.953745000 | -1.228416000 |
| Cl | -1.257364000 | -2.316543000 | 1.246846000  |
| Cl | -4.127474000 | -1.421914000 | -0.395033000 |
| O  | -2.146497000 | 3.365717000  | -0.125879000 |
| H  | -1.094920000 | 1.771175000  | -2.189782000 |

TS1-d-2 :

|   |             |              |              |
|---|-------------|--------------|--------------|
| C | 2.512687000 | -0.830993000 | -0.335759000 |
| C | 1.255080000 | -0.854545000 | -0.938690000 |
| C | 0.480410000 | 0.298004000  | -0.942301000 |
| C | 0.934712000 | 1.444304000  | -0.283567000 |
| C | 2.182336000 | 1.488918000  | 0.322162000  |
| C | 2.974722000 | 0.342425000  | 0.281306000  |
| H | 0.913895000 | -1.760328000 | -1.422892000 |
| H | 2.523122000 | 2.379902000  | 0.831232000  |

|    |              |              |              |
|----|--------------|--------------|--------------|
| C  | -1.325014000 | 2.000029000  | -0.570616000 |
| C  | -0.834839000 | 0.523428000  | -1.608216000 |
| C  | -1.872520000 | 1.357768000  | 0.697301000  |
| C  | -1.876549000 | -0.496816000 | -1.549580000 |
| C  | -2.421590000 | 0.137893000  | 0.761127000  |
| H  | -1.801450000 | 1.978300000  | 1.582616000  |
| C  | -2.571265000 | -0.726727000 | -0.416276000 |
| H  | -2.167147000 | -1.007206000 | -2.461444000 |
| O  | 0.050335000  | 2.464330000  | -0.246001000 |
| Cl | 4.543664000  | 0.400160000  | 1.040429000  |
| Cl | 3.488366000  | -2.279083000 | -0.384846000 |
| Cl | -3.036920000 | -0.433449000 | 2.298218000  |
| Cl | -3.800317000 | -1.959330000 | -0.397398000 |
| O  | -2.008464000 | 2.776102000  | -1.242345000 |
| H  | -0.743892000 | 1.002675000  | -2.582946000 |

P1-d-2:

|    |              |              |              |
|----|--------------|--------------|--------------|
| C  | 2.774927000  | -0.825453000 | -0.215485000 |
| C  | 1.628063000  | -1.375313000 | -0.771169000 |
| C  | 0.486343000  | -0.603450000 | -1.051174000 |
| C  | 0.576834000  | 0.775073000  | -0.794313000 |
| C  | 1.725227000  | 1.342645000  | -0.261592000 |
| C  | 2.824894000  | 0.548320000  | 0.050330000  |
| H  | 1.608139000  | -2.438625000 | -0.974844000 |
| H  | 1.770827000  | 2.413677000  | -0.113006000 |
| C  | -1.389995000 | 2.064244000  | -0.321821000 |
| C  | -0.660120000 | -1.254135000 | -1.675083000 |
| C  | -1.571542000 | 1.220965000  | 0.899834000  |
| C  | -2.022159000 | -1.153805000 | -1.421047000 |
| C  | -2.195041000 | 0.044442000  | 0.849773000  |
| H  | -1.254950000 | 1.649753000  | 1.843198000  |
| C  | -2.721113000 | -0.593286000 | -0.359682000 |
| H  | -2.654043000 | -1.678037000 | -2.131564000 |
| O  | -0.428127000 | 1.646062000  | -1.208641000 |
| Cl | 4.239001000  | 1.300004000  | 0.733100000  |
| Cl | 4.129285000  | -1.869415000 | 0.130374000  |
| Cl | -2.500046000 | -0.827802000 | 2.357099000  |
| Cl | -4.466142000 | -0.759026000 | -0.375947000 |
| O  | -2.027659000 | 3.046655000  | -0.554999000 |
| H  | -0.397237000 | -1.973909000 | -2.444736000 |

TS1-d-3 :

|    |              |              |              |
|----|--------------|--------------|--------------|
| C  | 2.996386000  | 0.671107000  | 0.265369000  |
| C  | 1.772256000  | 0.923350000  | 0.894591000  |
| C  | 0.723360000  | 0.043941000  | 0.714932000  |
| C  | 0.898383000  | -1.125541000 | -0.055295000 |
| C  | 2.127126000  | -1.398254000 | -0.673509000 |
| C  | 3.161838000  | -0.487206000 | -0.521962000 |
| H  | 1.670899000  | 1.809856000  | 1.508645000  |
| H  | 2.258704000  | -2.296829000 | -1.260319000 |
| C  | -1.245258000 | -1.379988000 | 1.008046000  |
| C  | -0.673837000 | 0.062629000  | 1.283011000  |
| C  | -2.540923000 | -1.457340000 | 0.274111000  |
| C  | -1.481343000 | 1.171344000  | 0.667064000  |
| C  | -3.202001000 | -0.361099000 | -0.148325000 |
| H  | -2.942414000 | -2.452124000 | 0.140396000  |
| C  | -2.646690000 | 0.981360000  | 0.028160000  |
| H  | -1.083781000 | 2.175790000  | 0.754831000  |
| O  | -0.143756000 | -1.928551000 | -0.095149000 |
| Cl | 4.678964000  | -0.814137000 | -1.317969000 |
| Cl | 4.292067000  | 1.813561000  | 0.479774000  |
| Cl | -4.723169000 | -0.553078000 | -0.971947000 |
| Cl | -3.510811000 | 2.358171000  | -0.612789000 |
| O  | -1.245293000 | -2.192744000 | 2.002427000  |
| H  | -0.656653000 | 0.191063000  | 2.370901000  |

P1-d-3:

|    |              |              |              |
|----|--------------|--------------|--------------|
| C  | -3.128640000 | 0.176493000  | 0.624373000  |
| C  | -1.837370000 | 0.523330000  | 1.072452000  |
| C  | -0.724034000 | 0.263959000  | 0.313776000  |
| C  | -0.875692000 | -0.374281000 | -0.993655000 |
| C  | -2.218583000 | -0.720765000 | -1.419107000 |
| C  | -3.308645000 | -0.452016000 | -0.634631000 |
| H  | -1.748732000 | 1.011416000  | 2.035480000  |
| H  | -2.326041000 | -1.194630000 | -2.386006000 |
| C  | 1.283777000  | 1.710415000  | -0.163671000 |
| C  | 0.671715000  | 0.633878000  | 0.760024000  |
| C  | 2.697827000  | 1.570528000  | -0.508389000 |
| C  | 1.544210000  | -0.570082000 | 0.993121000  |
| C  | 3.415491000  | 0.483501000  | -0.157902000 |
| H  | 3.136425000  | 2.368092000  | -1.093600000 |
| C  | 2.820482000  | -0.625590000 | 0.596300000  |
| H  | 1.113860000  | -1.402095000 | 1.537316000  |
| O  | 0.111801000  | -0.606660000 | -1.716041000 |
| Cl | -4.904207000 | -0.884472000 | -1.193006000 |

|    |              |              |              |
|----|--------------|--------------|--------------|
| Cl | -4.474102000 | 0.540524000  | 1.645786000  |
| Cl | 5.088446000  | 0.382329000  | -0.626202000 |
| Cl | 3.783015000  | -2.041296000 | 0.953644000  |
| O  | 0.615516000  | 2.657586000  | -0.532047000 |
| H  | 0.579130000  | 1.143124000  | 1.731615000  |

TS1-e:

|    |              |              |              |
|----|--------------|--------------|--------------|
| C  | 3.025003000  | 0.797413000  | 0.161970000  |
| C  | 1.714026000  | 1.059567000  | 0.515610000  |
| C  | 0.743025000  | 0.065483000  | 0.366108000  |
| C  | 1.086715000  | -1.217301000 | -0.195409000 |
| C  | 2.433759000  | -1.471150000 | -0.531878000 |
| C  | 3.376371000  | -0.475468000 | -0.361898000 |
| H  | 1.459459000  | 2.025615000  | 0.933236000  |
| H  | 2.713541000  | -2.431537000 | -0.942622000 |
| C  | -1.232945000 | -1.231785000 | 0.719551000  |
| C  | -0.674326000 | 0.112434000  | 0.556192000  |
| C  | -2.565698000 | -1.468820000 | 0.237703000  |
| C  | -1.533962000 | 1.172392000  | 0.275357000  |
| C  | -3.357627000 | -0.405361000 | -0.095604000 |
| H  | -2.966510000 | -2.474667000 | 0.237811000  |
| C  | -2.868329000 | 0.938981000  | -0.020251000 |
| H  | -1.140831000 | 2.176316000  | 0.173317000  |
| O  | 0.117943000  | -2.052774000 | -0.396694000 |
| Cl | 5.028497000  | -0.816386000 | -0.807377000 |
| Cl | 4.228619000  | 2.041045000  | 0.393588000  |
| Cl | -5.005916000 | -0.708941000 | -0.576654000 |
| Cl | -3.898213000 | 2.285826000  | -0.403775000 |
| O  | -0.837417000 | -1.873010000 | 1.855482000  |
| H  | -1.186722000 | -2.773999000 | 1.864936000  |

P1-e:

|   |              |              |              |
|---|--------------|--------------|--------------|
| C | 2.886215000  | 0.764761000  | 0.349201000  |
| C | 1.485960000  | 0.744294000  | 0.465371000  |
| C | 0.728514000  | -0.290971000 | -0.042408000 |
| C | 1.401432000  | -1.379134000 | -0.766339000 |
| C | 2.852327000  | -1.332843000 | -0.834004000 |
| C | 3.568498000  | -0.295969000 | -0.301235000 |
| H | 1.007223000  | 1.558243000  | 0.995725000  |
| H | 3.345304000  | -2.146972000 | -1.349025000 |
| C | -1.428353000 | -1.365949000 | 0.677897000  |

|    |              |              |              |
|----|--------------|--------------|--------------|
| C  | -0.743071000 | -0.291288000 | 0.080465000  |
| C  | -2.818464000 | -1.354695000 | 0.751805000  |
| C  | -1.491621000 | 0.786799000  | -0.395649000 |
| C  | -3.546772000 | -0.280187000 | 0.247517000  |
| H  | -3.347738000 | -2.177757000 | 1.217748000  |
| C  | -2.881332000 | 0.806315000  | -0.323503000 |
| H  | -0.984251000 | 1.618075000  | -0.868559000 |
| O  | 0.770377000  | -2.282334000 | -1.341357000 |
| Cl | 5.310114000  | -0.286727000 | -0.433920000 |
| Cl | 3.748805000  | 2.099147000  | 1.036078000  |
| Cl | -5.286624000 | -0.328425000 | 0.362456000  |
| Cl | -3.745065000 | 2.183343000  | -0.965166000 |
| O  | -0.685095000 | -2.362450000 | 1.226783000  |
| H  | -1.245682000 | -3.104867000 | 1.475388000  |

RC2:

|    |              |              |              |
|----|--------------|--------------|--------------|
| C  | 3.204528000  | 0.806064000  | 0.052674000  |
| C  | 1.883160000  | 1.240982000  | 0.080615000  |
| C  | 0.864137000  | 0.302764000  | -0.072552000 |
| C  | 1.201500000  | -1.047983000 | -0.249587000 |
| C  | 2.503861000  | -1.507280000 | -0.282201000 |
| C  | 3.512566000  | -0.557217000 | -0.126692000 |
| H  | 1.671770000  | 2.292964000  | 0.220720000  |
| H  | 2.738847000  | -2.553878000 | -0.417670000 |
| C  | -0.984978000 | -0.992706000 | -0.287993000 |
| C  | -0.584881000 | 0.340075000  | -0.101809000 |
| C  | -2.315631000 | -1.384757000 | -0.357080000 |
| C  | -1.557942000 | 1.330571000  | 0.004430000  |
| C  | -3.278900000 | -0.369932000 | -0.267820000 |
| H  | -2.599474000 | -2.410472000 | -0.538982000 |
| C  | -2.902877000 | 0.970751000  | -0.078913000 |
| H  | -1.296100000 | 2.370396000  | 0.150856000  |
| O  | 0.082932000  | -1.835962000 | -0.387366000 |
| Cl | 5.168053000  | -1.106533000 | -0.159739000 |
| Cl | 4.472078000  | 1.994490000  | 0.247428000  |
| Cl | -4.956486000 | -0.825701000 | -0.396173000 |
| Cl | -4.105463000 | 2.232613000  | 0.052583000  |
| O  | -2.171878000 | -2.151089000 | 1.979198000  |
| H  | -2.899825000 | -1.603380000 | 2.322308000  |

TS2:

|   |             |             |             |
|---|-------------|-------------|-------------|
| C | 3.218283000 | 0.799988000 | 0.051230000 |
|---|-------------|-------------|-------------|



|    |              |              |              |
|----|--------------|--------------|--------------|
| C  | 1.897056000  | 1.235988000  | 0.088650000  |
| C  | 0.875799000  | 0.296155000  | -0.036427000 |
| C  | 1.212738000  | -1.056626000 | -0.195395000 |
| C  | 2.513697000  | -1.517617000 | -0.239656000 |
| C  | 3.524828000  | -0.565549000 | -0.111444000 |
| H  | 1.687660000  | 2.290182000  | 0.213965000  |
| H  | 2.747698000  | -2.565664000 | -0.365910000 |
| C  | -0.977303000 | -0.993396000 | -0.217326000 |
| C  | -0.574376000 | 0.334183000  | -0.052190000 |
| C  | -2.319277000 | -1.404817000 | -0.226610000 |
| C  | -1.546609000 | 1.331088000  | 0.034311000  |
| C  | -3.281471000 | -0.357408000 | -0.228488000 |
| H  | -2.600726000 | -2.387908000 | -0.572844000 |
| C  | -2.896670000 | 0.973488000  | -0.057400000 |
| H  | -1.282725000 | 2.372296000  | 0.164462000  |
| O  | 0.088465000  | -1.846236000 | -0.306502000 |
| Cl | 5.179370000  | -1.115846000 | -0.158528000 |
| Cl | 4.487560000  | 1.990643000  | 0.211639000  |
| Cl | -4.943855000 | -0.811088000 | -0.383625000 |
| Cl | -4.085834000 | 2.250641000  | 0.020897000  |
| O  | -2.528770000 | -2.018980000 | 1.704929000  |
| H  | -1.742736000 | -2.583993000 | 1.780882000  |

IM2:

|    |              |              |              |
|----|--------------|--------------|--------------|
| C  | 3.234587000  | 0.800174000  | 0.037927000  |
| C  | 1.914756000  | 1.240034000  | 0.072657000  |
| C  | 0.891063000  | 0.297046000  | -0.006779000 |
| C  | 1.227331000  | -1.060778000 | -0.118551000 |
| C  | 2.527514000  | -1.525845000 | -0.157315000 |
| C  | 3.539772000  | -0.570966000 | -0.075933000 |
| H  | 1.708300000  | 2.298527000  | 0.161125000  |
| H  | 2.759670000  | -2.578307000 | -0.244502000 |
| C  | -0.957314000 | -0.977542000 | -0.113237000 |
| C  | -0.560487000 | 0.333388000  | -0.006022000 |
| C  | -2.353675000 | -1.484138000 | -0.094995000 |
| C  | -1.528954000 | 1.362612000  | 0.062384000  |
| C  | -3.304910000 | -0.308731000 | -0.121358000 |
| H  | -2.544466000 | -2.112572000 | -0.977431000 |
| C  | -2.891556000 | 1.000432000  | -0.012184000 |
| H  | -1.256006000 | 2.403618000  | 0.158974000  |
| O  | 0.096906000  | -1.842856000 | -0.186275000 |
| Cl | 5.195241000  | -1.124152000 | -0.119094000 |
| Cl | 4.507452000  | 1.994994000  | 0.141371000  |

|    |              |              |              |
|----|--------------|--------------|--------------|
| Cl | -4.972884000 | -0.745417000 | -0.274648000 |
| Cl | -4.057225000 | 2.308296000  | 0.014658000  |
| O  | -2.621071000 | -2.263196000 | 1.088076000  |
| H  | -2.336889000 | -3.170220000 | 0.928976000  |

TS2-a:

|    |              |              |              |
|----|--------------|--------------|--------------|
| C  | 3.138262000  | 0.766381000  | 0.171304000  |
| C  | 1.812393000  | 1.053499000  | 0.486535000  |
| C  | 0.857245000  | 0.048277000  | 0.362215000  |
| C  | 1.253933000  | -1.217144000 | -0.088901000 |
| C  | 2.559261000  | -1.527028000 | -0.420822000 |
| C  | 3.508138000  | -0.513830000 | -0.280731000 |
| H  | 1.551002000  | 2.046990000  | 0.827154000  |
| H  | 2.842315000  | -2.510169000 | -0.770588000 |
| C  | -0.910786000 | -1.400707000 | 0.326876000  |
| C  | -0.593994000 | -0.016173000 | 0.507200000  |
| C  | -2.051317000 | -2.116828000 | 0.580616000  |
| C  | -1.484707000 | 1.031645000  | 0.425156000  |
| C  | -3.458111000 | -0.223749000 | -0.345437000 |
| H  | -2.150915000 | -3.114631000 | 0.161568000  |
| C  | -2.842449000 | 0.924232000  | -0.004025000 |
| H  | -1.100669000 | 2.038269000  | 0.538066000  |
| O  | 0.200757000  | -2.089697000 | -0.155424000 |
| Cl | 5.166503000  | -0.883332000 | -0.680066000 |
| Cl | 4.327657000  | 2.035844000  | 0.350512000  |
| Cl | -5.064699000 | -0.471899000 | -0.839292000 |
| Cl | -3.661275000 | 2.496774000  | -0.266235000 |
| O  | -2.850904000 | -1.802778000 | 1.631781000  |
| H  | -3.726942000 | -2.187682000 | 1.509382000  |

IM2-a:

|   |              |              |              |
|---|--------------|--------------|--------------|
| C | -3.083987000 | 0.852431000  | 0.016529000  |
| C | -1.713333000 | 1.061242000  | -0.119489000 |
| C | -0.859937000 | -0.037789000 | -0.146360000 |
| C | -1.397657000 | -1.320256000 | -0.021977000 |
| C | -2.752379000 | -1.559341000 | 0.125360000  |
| C | -3.598199000 | -0.449914000 | 0.140636000  |
| H | -1.340615000 | 2.074019000  | -0.203175000 |
| H | -3.147268000 | -2.561029000 | 0.222651000  |
| C | 0.793567000  | -1.635577000 | -0.287374000 |
| C | 0.599072000  | -0.184012000 | -0.225402000 |
| C | 1.800776000  | -2.450920000 | -0.645485000 |

|    |              |              |              |
|----|--------------|--------------|--------------|
| C  | 1.463542000  | 0.868031000  | -0.190679000 |
| C  | 3.615698000  | 0.012231000  | 0.687775000  |
| H  | 1.632129000  | -3.521559000 | -0.658583000 |
| C  | 2.892142000  | 0.894648000  | 0.020668000  |
| H  | 1.019272000  | 1.855479000  | -0.263386000 |
| O  | -0.438016000 | -2.283919000 | -0.052272000 |
| Cl | -5.312714000 | -0.728523000 | 0.317800000  |
| Cl | -4.141053000 | 2.246708000  | 0.035287000  |
| Cl | 5.216580000  | -0.186021000 | 1.123949000  |
| Cl | 3.708904000  | 2.361842000  | -0.620454000 |
| O  | 3.019822000  | -1.992854000 | -1.021564000 |
| H  | 3.607013000  | -2.735484000 | -1.193916000 |

TS2-a-1: :

|    |              |              |              |
|----|--------------|--------------|--------------|
| C  | -3.058755000 | 0.862929000  | -0.014845000 |
| C  | -1.690628000 | 1.044020000  | -0.201594000 |
| C  | -0.853798000 | -0.068454000 | -0.198484000 |
| C  | -1.405226000 | -1.335410000 | 0.006553000  |
| C  | -2.757242000 | -1.546170000 | 0.207090000  |
| C  | -3.586648000 | -0.424387000 | 0.191121000  |
| H  | -1.307185000 | 2.045339000  | -0.350236000 |
| H  | -3.162394000 | -2.535704000 | 0.366589000  |
| C  | 0.762995000  | -1.703652000 | -0.325499000 |
| C  | 0.599026000  | -0.245693000 | -0.299788000 |
| C  | 1.764726000  | -2.508674000 | -0.715160000 |
| C  | 1.487330000  | 0.788055000  | -0.277476000 |
| C  | 3.653130000  | -0.067032000 | 0.611457000  |
| H  | 1.647417000  | -3.588335000 | -0.674555000 |
| C  | 2.909031000  | 0.827457000  | -0.028551000 |
| H  | 1.055823000  | 1.779720000  | -0.368275000 |
| O  | -0.458970000 | -2.315881000 | -0.006677000 |
| Cl | -5.297505000 | -0.666739000 | 0.432694000  |
| Cl | -4.096002000 | 2.270861000  | -0.037429000 |
| Cl | 5.203141000  | -0.111549000 | 1.247989000  |
| Cl | 3.701693000  | 2.341759000  | -0.568037000 |
| O  | 2.894477000  | -2.010500000 | -1.282377000 |
| H  | 3.646083000  | -2.011538000 | -0.668735000 |

P2-a-1:

|   |              |              |              |
|---|--------------|--------------|--------------|
| C | -3.027053000 | -0.886159000 | 0.038988000  |
| C | -1.655586000 | -1.053930000 | -0.098372000 |
| C | -0.843891000 | 0.081454000  | -0.162418000 |

|    |              |              |              |
|----|--------------|--------------|--------------|
| C  | -1.434483000 | 1.344398000  | -0.067933000 |
| C  | -2.797707000 | 1.543704000  | 0.080565000  |
| C  | -3.595031000 | 0.405484000  | 0.129199000  |
| H  | -1.244941000 | -2.053921000 | -0.147882000 |
| H  | -3.228594000 | 2.532632000  | 0.152976000  |
| C  | 0.736839000  | 1.696952000  | -0.279781000 |
| C  | 0.592010000  | 0.300787000  | -0.280245000 |
| C  | 1.807702000  | 2.632910000  | -0.579794000 |
| C  | 1.512073000  | -0.769535000 | -0.421993000 |
| C  | 3.531042000  | 0.031535000  | 0.735320000  |
| H  | 1.467199000  | 3.685583000  | -0.586152000 |
| C  | 2.882168000  | -0.837438000 | -0.094895000 |
| H  | 1.083758000  | -1.695799000 | -0.789059000 |
| O  | -0.493525000 | 2.319790000  | -0.137366000 |
| Cl | -5.316909000 | 0.614976000  | 0.307732000  |
| Cl | -4.035840000 | -2.310937000 | 0.109074000  |
| Cl | 5.192578000  | -0.045307000 | 1.143888000  |
| Cl | 3.744357000  | -2.227833000 | -0.743724000 |
| O  | 2.961392000  | 2.333437000  | -0.827823000 |
| H  | 2.999982000  | 0.839447000  | 1.211283000  |

TS2-b:

|    |              |              |              |
|----|--------------|--------------|--------------|
| C  | 3.143502000  | 0.794257000  | -0.012810000 |
| C  | 1.792491000  | 1.116056000  | 0.075893000  |
| C  | 0.852765000  | 0.083389000  | 0.059709000  |
| C  | 1.312495000  | -1.236831000 | -0.045477000 |
| C  | 2.643128000  | -1.586972000 | -0.153840000 |
| C  | 3.568459000  | -0.544350000 | -0.128562000 |
| H  | 1.499229000  | 2.155067000  | 0.150550000  |
| H  | 2.962792000  | -2.615834000 | -0.245547000 |
| C  | -0.873110000 | -1.347862000 | 0.015425000  |
| C  | -0.598596000 | -0.004833000 | 0.133608000  |
| C  | -3.209603000 | -1.509809000 | 0.744175000  |
| C  | -1.558044000 | 1.058820000  | 0.266121000  |
| C  | -3.493563000 | -0.412670000 | -0.019259000 |
| H  | -3.536029000 | -2.492882000 | 0.422218000  |
| C  | -2.899402000 | 0.887787000  | 0.180418000  |
| H  | -1.179472000 | 2.067530000  | 0.389167000  |
| O  | 0.237959000  | -2.111099000 | -0.057582000 |
| Cl | 5.265362000  | -0.947697000 | -0.237765000 |
| Cl | 4.307085000  | 2.101541000  | 0.014319000  |
| Cl | -4.482066000 | -0.666951000 | -1.445612000 |
| Cl | -3.963920000 | 2.289335000  | 0.167996000  |

|   |              |              |             |
|---|--------------|--------------|-------------|
| O | -2.801061000 | -1.373254000 | 2.026417000 |
| H | -2.474653000 | -2.216831000 | 2.358582000 |

IM2-b:

|    |              |              |              |
|----|--------------|--------------|--------------|
| C  | 3.165751000  | 0.772747000  | -0.007086000 |
| C  | 1.806340000  | 1.067305000  | 0.038028000  |
| C  | 0.890538000  | 0.014146000  | -0.002240000 |
| C  | 1.382770000  | -1.295559000 | -0.087101000 |
| C  | 2.722674000  | -1.620319000 | -0.142492000 |
| C  | 3.623324000  | -0.557471000 | -0.097094000 |
| H  | 1.489064000  | 2.099875000  | 0.100846000  |
| H  | 3.066328000  | -2.642941000 | -0.213527000 |
| C  | -0.778353000 | -1.433939000 | -0.069749000 |
| C  | -0.567071000 | -0.091009000 | 0.029536000  |
| C  | -3.650176000 | -1.324121000 | 0.970123000  |
| C  | -1.520171000 | 0.993280000  | 0.120197000  |
| C  | -3.578968000 | -0.399866000 | -0.000822000 |
| H  | -4.198752000 | -2.247028000 | 0.815791000  |
| C  | -2.856102000 | 0.864982000  | 0.086645000  |
| H  | -1.109019000 | 1.993105000  | 0.203106000  |
| O  | 0.324516000  | -2.190800000 | -0.121793000 |
| Cl | 5.330846000  | -0.924112000 | -0.152227000 |
| Cl | 4.299671000  | 2.104265000  | 0.047034000  |
| Cl | -4.468475000 | -0.708717000 | -1.494636000 |
| Cl | -3.864648000 | 2.315658000  | 0.122192000  |
| O  | -3.069570000 | -1.134969000 | 2.179414000  |
| H  | -3.186216000 | -1.918523000 | 2.724976000  |

TS2-b-1 :

|   |              |              |              |
|---|--------------|--------------|--------------|
| C | 3.163059000  | 0.784265000  | 0.040508000  |
| C | 1.797201000  | 1.001474000  | 0.179898000  |
| C | 0.934163000  | -0.094230000 | 0.099261000  |
| C | 1.479136000  | -1.366862000 | -0.116207000 |
| C | 2.830903000  | -1.619436000 | -0.233766000 |
| C | 3.678024000  | -0.515041000 | -0.163403000 |
| H | 1.433373000  | 2.006732000  | 0.346966000  |
| H | 3.220523000  | -2.616137000 | -0.387122000 |
| C | -0.663244000 | -1.638171000 | 0.112624000  |
| C | -0.515841000 | -0.267391000 | 0.151793000  |
| C | -3.794073000 | -1.493794000 | 0.671543000  |
| C | -1.474681000 | 0.798849000  | 0.281358000  |
| C | -3.717350000 | -0.357395000 | -0.052037000 |

|    |              |              |              |
|----|--------------|--------------|--------------|
| H  | -4.592595000 | -2.198573000 | 0.469069000  |
| C  | -2.820631000 | 0.771052000  | 0.146175000  |
| H  | -1.042681000 | 1.770449000  | 0.491941000  |
| O  | 0.469823000  | -2.312632000 | -0.131793000 |
| Cl | 5.391223000  | -0.783294000 | -0.342905000 |
| Cl | 4.233487000  | 2.162035000  | 0.132963000  |
| Cl | -4.929153000 | -0.177260000 | -1.331830000 |
| Cl | -3.638518000 | 2.336931000  | 0.269312000  |
| O  | -3.006040000 | -1.879190000 | 1.687568000  |
| H  | -2.078536000 | -1.600819000 | 1.558268000  |

P2-b-1:

|    |              |              |              |
|----|--------------|--------------|--------------|
| C  | 3.136794000  | 0.786102000  | 0.177290000  |
| C  | 1.762388000  | 1.003345000  | 0.160915000  |
| C  | 0.922303000  | -0.052338000 | -0.191875000 |
| C  | 1.491283000  | -1.289530000 | -0.503683000 |
| C  | 2.849326000  | -1.540463000 | -0.493700000 |
| C  | 3.677738000  | -0.475337000 | -0.145980000 |
| H  | 1.376548000  | 1.979014000  | 0.426010000  |
| H  | 3.258182000  | -2.510857000 | -0.738765000 |
| C  | -0.673102000 | -1.548036000 | -0.697184000 |
| C  | -0.520381000 | -0.230539000 | -0.314488000 |
| C  | -3.313414000 | -1.424666000 | 1.236701000  |
| C  | -1.490590000 | 0.793164000  | -0.161302000 |
| C  | -3.695033000 | -0.345691000 | 0.309734000  |
| H  | -4.146318000 | -2.116754000 | 1.457344000  |
| C  | -2.887781000 | 0.711085000  | -0.107733000 |
| H  | -1.098924000 | 1.804324000  | -0.183924000 |
| O  | 0.508723000  | -2.197569000 | -0.819412000 |
| Cl | 5.401355000  | -0.749242000 | -0.121100000 |
| Cl | 4.179046000  | 2.118643000  | 0.617744000  |
| Cl | -5.402436000 | -0.359319000 | -0.064638000 |
| Cl | -3.688164000 | 2.208654000  | -0.616403000 |
| O  | -2.224627000 | -1.560846000 | 1.756862000  |
| H  | -1.546062000 | -2.129489000 | -0.937670000 |

TS2-b-2 :

|   |             |              |              |
|---|-------------|--------------|--------------|
| C | 3.307334000 | 0.488499000  | -0.120088000 |
| C | 1.982064000 | 0.899019000  | -0.014568000 |
| C | 0.972787000 | -0.065679000 | -0.054686000 |
| C | 1.341465000 | -1.416338000 | -0.202493000 |
| C | 2.647761000 | -1.849749000 | -0.310765000 |

|    |              |              |              |
|----|--------------|--------------|--------------|
| C  | 3.640920000  | -0.872318000 | -0.266667000 |
| H  | 1.759435000  | 1.952093000  | 0.096146000  |
| H  | 2.898219000  | -2.895462000 | -0.425156000 |
| C  | -0.834183000 | -1.383568000 | -0.091788000 |
| C  | -0.472215000 | -0.077721000 | 0.022677000  |
| C  | -3.462129000 | -1.845155000 | 1.044505000  |
| C  | -1.533982000 | 0.896140000  | 0.166212000  |
| C  | -3.019148000 | -1.059130000 | 0.004508000  |
| H  | -3.847374000 | -2.843316000 | 0.871690000  |
| C  | -2.779884000 | 0.399540000  | 0.157323000  |
| H  | -1.344933000 | 1.956078000  | 0.275884000  |
| O  | 0.217742000  | -2.224732000 | -0.223117000 |
| Cl | 5.307681000  | -1.385730000 | -0.398970000 |
| Cl | 4.557275000  | 1.714503000  | -0.065997000 |
| Cl | -3.534771000 | -1.597518000 | -1.612671000 |
| Cl | -4.204781000 | 1.408333000  | 0.314158000  |
| O  | -3.316511000 | -1.422051000 | 2.311900000  |
| H  | -3.582397000 | -2.111210000 | 2.929956000  |

P2-b-2:

|    |              |              |              |
|----|--------------|--------------|--------------|
| C  | 3.444240000  | 0.653579000  | -0.091973000 |
| C  | 2.232812000  | 1.343558000  | -0.112437000 |
| C  | 1.041025000  | 0.630368000  | 0.013769000  |
| C  | 1.105093000  | -0.774996000 | 0.159204000  |
| C  | 2.283487000  | -1.478541000 | 0.182181000  |
| C  | 3.471389000  | -0.742964000 | 0.053866000  |
| H  | 2.233453000  | 2.419486000  | -0.225883000 |
| H  | 2.307062000  | -2.553725000 | 0.293420000  |
| C  | -1.033137000 | -0.322858000 | 0.205794000  |
| C  | -0.357921000 | 0.957411000  | 0.039055000  |
| C  | -3.399319000 | -1.253884000 | 0.414265000  |
| C  | -1.329250000 | 1.936908000  | -0.020676000 |
| C  | -2.396371000 | -0.186308000 | 0.261718000  |
| H  | -2.916351000 | -2.217894000 | 0.571687000  |
| C  | -2.574402000 | 1.245494000  | 0.109571000  |
| H  | -1.224982000 | 3.003131000  | -0.138687000 |
| O  | -0.156629000 | -1.358222000 | 0.275450000  |
| Cl | 4.976295000  | -1.618651000 | 0.080482000  |
| Cl | 4.922999000  | 1.570752000  | -0.252001000 |
| Cl | -4.313204000 | -1.561759000 | -1.221845000 |
| Cl | -4.087320000 | 2.041673000  | 0.063241000  |
| O  | -4.321397000 | -0.941433000 | 1.396664000  |
| H  | -4.979956000 | -1.644614000 | 1.448600000  |

TS2-c:

|    |              |              |              |
|----|--------------|--------------|--------------|
| C  | 3.211015000  | 0.798147000  | -0.026024000 |
| C  | 1.886034000  | 1.213954000  | 0.047204000  |
| C  | 0.879957000  | 0.246923000  | 0.065800000  |
| C  | 1.242654000  | -1.108921000 | 0.007508000  |
| C  | 2.550195000  | -1.549721000 | -0.066464000 |
| C  | 3.542344000  | -0.571989000 | -0.082309000 |
| H  | 1.661993000  | 2.271704000  | 0.089720000  |
| H  | 2.800548000  | -2.600757000 | -0.109228000 |
| C  | -0.935717000 | -1.068163000 | 0.114953000  |
| C  | -0.566401000 | 0.246175000  | 0.128386000  |
| C  | -2.325629000 | -1.559319000 | 0.183878000  |
| C  | -1.561736000 | 1.283967000  | 0.158649000  |
| C  | -3.347403000 | -0.422623000 | 0.052769000  |
| H  | -2.506200000 | -2.408315000 | -0.478541000 |
| C  | -2.879233000 | 0.966099000  | 0.091271000  |
| H  | -1.266242000 | 2.322687000  | 0.235742000  |
| O  | 0.127917000  | -1.913058000 | 0.030593000  |
| Cl | 5.206170000  | -1.091558000 | -0.174127000 |
| Cl | 4.460652000  | 2.021055000  | -0.046930000 |
| Cl | -4.746251000 | -0.790507000 | -0.974178000 |
| Cl | -4.086483000 | 2.227514000  | 0.165890000  |
| O  | -2.801989000 | -1.819682000 | 1.527138000  |
| H  | -3.653508000 | -0.801152000 | 1.245600000  |

IM2-c:

|   |              |              |              |
|---|--------------|--------------|--------------|
| C | -3.047211000 | 0.846596000  | 0.057999000  |
| C | -1.718802000 | 1.235055000  | -0.044236000 |
| C | -0.735302000 | 0.245143000  | -0.143201000 |
| C | -1.126516000 | -1.107173000 | -0.130163000 |
| C | -2.438719000 | -1.520775000 | -0.021718000 |
| C | -3.406237000 | -0.520948000 | 0.069206000  |
| H | -1.468296000 | 2.287603000  | -0.046108000 |
| H | -2.713001000 | -2.566533000 | -0.012270000 |
| C | 1.043435000  | -1.115102000 | -0.291230000 |
| C | 0.696928000  | 0.224220000  | -0.260093000 |
| C | 2.423980000  | -1.585628000 | -0.574456000 |
| C | 1.707911000  | 1.247963000  | -0.308437000 |
| C | 3.451329000  | -0.538176000 | -0.077875000 |
| H | 2.654838000  | -2.570529000 | -0.149299000 |
| C | 3.004266000  | 0.886268000  | -0.241887000 |



|    |              |              |              |
|----|--------------|--------------|--------------|
| H  | 1.428617000  | 2.289828000  | -0.396463000 |
| O  | -0.033834000 | -1.935148000 | -0.218914000 |
| Cl | -5.074266000 | -1.005821000 | 0.195605000  |
| Cl | -4.268540000 | 2.089933000  | 0.177441000  |
| Cl | 3.817845000  | -0.846424000 | 1.699736000  |
| Cl | 4.267392000  | 2.086080000  | -0.292202000 |
| O  | 2.278168000  | -1.567087000 | -1.940150000 |
| H  | 4.391476000  | -0.711192000 | -0.596677000 |

TS2-c-1: :

|    |              |              |              |
|----|--------------|--------------|--------------|
| C  | -3.003899000 | 0.852091000  | 0.019670000  |
| C  | -1.667865000 | 1.218103000  | -0.099653000 |
| C  | -0.706409000 | 0.212867000  | -0.220751000 |
| C  | -1.122812000 | -1.126466000 | -0.205720000 |
| C  | -2.441807000 | -1.519693000 | -0.086689000 |
| C  | -3.389925000 | -0.505061000 | 0.026126000  |
| H  | -1.400794000 | 2.266683000  | -0.097486000 |
| H  | -2.733651000 | -2.560792000 | -0.080104000 |
| C  | 1.053284000  | -1.163719000 | -0.427898000 |
| C  | 0.733546000  | 0.163730000  | -0.357268000 |
| C  | 2.393579000  | -1.803880000 | -0.659688000 |
| C  | 1.727940000  | 1.210293000  | -0.413434000 |
| C  | 3.501218000  | -0.396676000 | 0.250591000  |
| H  | 2.666332000  | -2.585105000 | 0.067597000  |
| C  | 3.020497000  | 0.921865000  | -0.182361000 |
| H  | 1.436201000  | 2.215750000  | -0.691332000 |
| O  | -0.042329000 | -1.966751000 | -0.326966000 |
| Cl | -5.067609000 | -0.961973000 | 0.178039000  |
| Cl | -4.198298000 | 2.120813000  | 0.165221000  |
| Cl | 3.362702000  | -0.720200000 | 1.986671000  |
| Cl | 4.279634000  | 2.121629000  | -0.432387000 |
| O  | 2.863517000  | -1.851326000 | -1.824119000 |
| H  | 4.479044000  | -0.697216000 | -0.105776000 |

P2-c-1:

|   |              |              |              |
|---|--------------|--------------|--------------|
| C | -2.861633000 | 0.868106000  | 0.062833000  |
| C | -1.497112000 | 1.111302000  | -0.031363000 |
| C | -0.635827000 | 0.029940000  | -0.228182000 |
| C | -1.171165000 | -1.258853000 | -0.304288000 |
| C | -2.524514000 | -1.534446000 | -0.203464000 |
| C | -3.372539000 | -0.446737000 | -0.021461000 |
| H | -1.130201000 | 2.125796000  | 0.054080000  |

|    |              |              |              |
|----|--------------|--------------|--------------|
| H  | -2.911448000 | -2.542120000 | -0.264343000 |
| C  | 1.012064000  | -1.490726000 | -0.528694000 |
| C  | 0.809123000  | -0.115465000 | -0.346115000 |
| C  | 2.143179000  | -2.314797000 | -0.926234000 |
| C  | 1.705028000  | 0.978552000  | -0.355483000 |
| C  | 3.822333000  | 0.323903000  | 0.861102000  |
| H  | 1.883460000  | -3.384202000 | -1.041631000 |
| C  | 3.079802000  | 1.033132000  | -0.029868000 |
| H  | 1.273054000  | 1.927384000  | -0.657813000 |
| O  | -0.185087000 | -2.178147000 | -0.485996000 |
| Cl | -5.085200000 | -0.751829000 | 0.103031000  |
| Cl | -3.933165000 | 2.227934000  | 0.299582000  |
| Cl | 3.185652000  | -0.835810000 | 1.971239000  |
| Cl | 3.969634000  | 2.352722000  | -0.825984000 |
| O  | 3.263382000  | -1.898787000 | -1.149693000 |
| H  | 4.878683000  | 0.503836000  | 0.988770000  |

TS2-c-2 :

|    |              |              |              |
|----|--------------|--------------|--------------|
| C  | -3.077332000 | 0.802763000  | 0.055500000  |
| C  | -1.724661000 | 1.116972000  | 0.030022000  |
| C  | -0.793864000 | 0.074613000  | -0.043774000 |
| C  | -1.263882000 | -1.247303000 | -0.084775000 |
| C  | -2.595626000 | -1.593833000 | -0.025991000 |
| C  | -3.512165000 | -0.541568000 | 0.030053000  |
| H  | -1.418298000 | 2.153862000  | 0.076324000  |
| H  | -2.926118000 | -2.623107000 | -0.043896000 |
| C  | 0.927715000  | -1.391900000 | -0.039163000 |
| C  | 0.646028000  | -0.021186000 | -0.124871000 |
| C  | 3.258258000  | -1.576087000 | -0.837527000 |
| C  | 1.596440000  | 1.043558000  | -0.234374000 |
| C  | 3.723090000  | -0.351449000 | -0.020106000 |
| H  | 3.311260000  | -2.533580000 | -0.292366000 |
| C  | 2.940710000  | 0.910737000  | -0.209945000 |
| H  | 1.197740000  | 2.046185000  | -0.337958000 |
| O  | -0.191906000 | -2.127374000 | -0.114929000 |
| Cl | -5.207967000 | -0.934825000 | 0.053724000  |
| Cl | -4.232297000 | 2.111107000  | 0.138246000  |
| Cl | 3.842110000  | -0.784117000 | 1.753367000  |
| Cl | 3.920442000  | 2.357343000  | -0.353447000 |
| O  | 3.048451000  | -1.492346000 | -2.023749000 |
| H  | 4.755903000  | -0.179141000 | -0.325107000 |

## P2-c-2:

|    |              |              |              |
|----|--------------|--------------|--------------|
| C  | 3.039570000  | 0.786684000  | -0.026747000 |
| C  | 1.679610000  | 1.074808000  | -0.092954000 |
| C  | 0.775346000  | 0.014764000  | -0.173537000 |
| C  | 1.275891000  | -1.293338000 | -0.173891000 |
| C  | 2.615606000  | -1.613673000 | -0.099660000 |
| C  | 3.506463000  | -0.543943000 | -0.029445000 |
| H  | 1.353314000  | 2.106286000  | -0.075348000 |
| H  | 2.966089000  | -2.636369000 | -0.098547000 |
| C  | -0.877210000 | -1.444369000 | -0.277856000 |
| C  | -0.681913000 | -0.095607000 | -0.257878000 |
| C  | -3.256427000 | -0.958922000 | 1.589931000  |
| C  | -1.627694000 | 0.996536000  | -0.328255000 |
| C  | -3.734358000 | -0.271641000 | 0.294009000  |
| H  | -3.422348000 | -2.052515000 | 1.617290000  |
| C  | -2.950628000 | 0.933434000  | -0.118631000 |
| H  | -1.210655000 | 1.963101000  | -0.586962000 |
| O  | 0.223120000  | -2.196172000 | -0.244580000 |
| Cl | 5.213268000  | -0.901346000 | 0.055033000  |
| Cl | 4.161473000  | 2.124385000  | 0.067684000  |
| Cl | -3.851892000 | -1.528414000 | -1.043025000 |
| Cl | -3.917619000 | 2.388652000  | -0.336949000 |
| O  | -2.821700000 | -0.343226000 | 2.521011000  |
| H  | -4.772223000 | 0.010588000  | 0.474980000  |

## TS2-d:

|   |              |              |              |
|---|--------------|--------------|--------------|
| C | 3.208448000  | 0.791559000  | 0.077311000  |
| C | 1.890996000  | 1.204831000  | 0.257797000  |
| C | 0.872810000  | 0.257318000  | 0.192787000  |
| C | 1.198127000  | -1.086430000 | -0.058575000 |
| C | 2.497176000  | -1.522389000 | -0.236507000 |
| C | 3.507853000  | -0.561742000 | -0.168714000 |
| H | 1.681820000  | 2.249229000  | 0.448946000  |
| H | 2.728615000  | -2.561563000 | -0.425097000 |
| C | -0.986238000 | -1.097412000 | 0.309018000  |
| C | -0.575170000 | 0.305349000  | 0.268494000  |
| C | -2.404005000 | -1.520543000 | 0.049732000  |
| C | -1.510271000 | 1.288398000  | 0.172573000  |
| C | -3.317995000 | -0.342401000 | -0.163597000 |
| H | -2.551331000 | -2.296209000 | -0.705356000 |
| C | -2.899098000 | 0.941509000  | -0.019209000 |
| H | -1.240591000 | 2.336435000  | 0.160684000  |
| O | 0.090298000  | -1.893456000 | -0.121606000 |

|    |              |              |              |
|----|--------------|--------------|--------------|
| Cl | 5.153591000  | -1.089167000 | -0.393763000 |
| Cl | 4.474736000  | 1.991682000  | 0.168635000  |
| Cl | -4.958061000 | -0.761173000 | -0.521904000 |
| Cl | -4.007073000 | 2.288430000  | -0.150530000 |
| O  | -2.532466000 | -2.048445000 | 1.394728000  |
| H  | -1.251271000 | -1.447100000 | 1.507749000  |

IM2-d:

|    |              |              |              |
|----|--------------|--------------|--------------|
| C  | 3.188228000  | 0.809333000  | -0.045438000 |
| C  | 1.869292000  | 1.238991000  | 0.056261000  |
| C  | 0.860213000  | 0.291657000  | 0.222130000  |
| C  | 1.189375000  | -1.072965000 | 0.263055000  |
| C  | 2.493841000  | -1.523813000 | 0.157800000  |
| C  | 3.495548000  | -0.564650000 | 0.003827000  |
| H  | 1.649542000  | 2.297895000  | 0.015109000  |
| H  | 2.732639000  | -2.577799000 | 0.189665000  |
| C  | -1.041732000 | -1.047226000 | 0.575534000  |
| C  | -0.579497000 | 0.366672000  | 0.320203000  |
| C  | -2.239243000 | -1.410336000 | -0.377649000 |
| C  | -1.483849000 | 1.351091000  | 0.130199000  |
| C  | -3.278794000 | -0.283558000 | -0.163227000 |
| H  | -1.843079000 | -1.295299000 | -1.410632000 |
| C  | -2.886808000 | 0.999673000  | 0.036917000  |
| H  | -1.198084000 | 2.385291000  | -0.013704000 |
| O  | 0.105449000  | -1.885280000 | 0.395041000  |
| Cl | 5.142404000  | -1.116518000 | -0.127764000 |
| Cl | 4.443912000  | 2.009361000  | -0.234750000 |
| Cl | -4.926374000 | -0.756417000 | -0.307677000 |
| Cl | -4.026272000 | 2.322156000  | 0.129069000  |
| O  | -2.633041000 | -2.659212000 | -0.177153000 |
| H  | -1.412125000 | -1.179250000 | 1.597886000  |

TS2-d-1: :

|   |              |              |              |
|---|--------------|--------------|--------------|
| C | 3.157618000  | 0.811784000  | -0.097498000 |
| C | 1.839626000  | 1.236944000  | 0.023599000  |
| C | 0.853280000  | 0.294800000  | 0.314361000  |
| C | 1.208051000  | -1.054755000 | 0.455543000  |
| C | 2.508821000  | -1.506518000 | 0.323949000  |
| C | 3.487869000  | -0.552189000 | 0.049593000  |
| H | 1.604297000  | 2.285860000  | -0.100869000 |
| H | 2.761976000  | -2.552231000 | 0.430051000  |
| C | -1.000453000 | -1.033288000 | 0.742815000  |

|    |              |              |              |
|----|--------------|--------------|--------------|
| C  | -0.584934000 | 0.345601000  | 0.469966000  |
| C  | -2.221891000 | -1.400992000 | -0.632866000 |
| C  | -1.500487000 | 1.330842000  | 0.227153000  |
| C  | -3.257235000 | -0.297802000 | -0.247522000 |
| H  | -1.595306000 | -1.046463000 | -1.479529000 |
| C  | -2.885701000 | 0.972823000  | 0.070404000  |
| H  | -1.208023000 | 2.362995000  | 0.080966000  |
| O  | 0.131637000  | -1.846304000 | 0.732557000  |
| Cl | 5.135148000  | -1.092755000 | -0.109628000 |
| Cl | 4.387943000  | 2.002517000  | -0.440922000 |
| Cl | -4.902248000 | -0.772868000 | -0.393764000 |
| Cl | -4.046976000 | 2.272231000  | 0.243981000  |
| O  | -2.542623000 | -2.606678000 | -0.582110000 |
| H  | -1.658172000 | -1.264944000 | 1.574481000  |

P2-d-1:

|    |              |              |              |
|----|--------------|--------------|--------------|
| C  | -3.184245000 | 0.749752000  | 0.225945000  |
| C  | -1.820470000 | 1.018631000  | 0.184090000  |
| C  | -0.952225000 | 0.007151000  | -0.228998000 |
| C  | -1.481857000 | -1.239551000 | -0.574100000 |
| C  | -2.830134000 | -1.540663000 | -0.537697000 |
| C  | -3.686594000 | -0.520126000 | -0.131154000 |
| H  | -1.462427000 | 1.997935000  | 0.473868000  |
| H  | -3.210275000 | -2.515823000 | -0.808889000 |
| C  | 0.685833000  | -1.402889000 | -0.835074000 |
| C  | 0.491053000  | -0.109931000 | -0.392851000 |
| C  | 2.981484000  | -1.208127000 | 1.283872000  |
| C  | 1.434495000  | 0.955553000  | -0.243104000 |
| C  | 3.550149000  | -0.238847000 | 0.336392000  |
| H  | 1.990071000  | -0.923643000 | 1.674759000  |
| C  | 2.818966000  | 0.863237000  | -0.125485000 |
| H  | 1.027909000  | 1.958467000  | -0.312616000 |
| O  | -0.477164000 | -2.096359000 | -0.945449000 |
| Cl | -5.396964000 | -0.857301000 | -0.074533000 |
| Cl | -4.263476000 | 2.024402000  | 0.739734000  |
| Cl | 5.225748000  | -0.434625000 | -0.035244000 |
| Cl | 3.699860000  | 2.320073000  | -0.595024000 |
| O  | 3.544099000  | -2.213346000 | 1.662914000  |
| H  | 1.572661000  | -1.937774000 | -1.131730000 |

TS2-d-2 :

|   |              |             |              |
|---|--------------|-------------|--------------|
| C | -3.139975000 | 0.822870000 | -0.024556000 |
|---|--------------|-------------|--------------|

|    |              |              |              |
|----|--------------|--------------|--------------|
| C  | -1.805639000 | 1.195091000  | -0.116244000 |
| C  | -0.829417000 | 0.200829000  | -0.205685000 |
| C  | -1.210225000 | -1.150460000 | -0.194176000 |
| C  | -2.536118000 | -1.544780000 | -0.088500000 |
| C  | -3.499984000 | -0.542352000 | -0.009388000 |
| H  | -1.545740000 | 2.245730000  | -0.121596000 |
| H  | -2.815703000 | -2.589028000 | -0.074398000 |
| C  | 1.051966000  | -1.207211000 | -0.412278000 |
| C  | 0.611929000  | 0.222633000  | -0.258389000 |
| C  | 2.054538000  | -1.706090000 | 0.687407000  |
| C  | 1.473064000  | 1.265117000  | -0.108536000 |
| C  | 3.434129000  | -0.176110000 | -0.052373000 |
| H  | 1.912160000  | -1.218583000 | 1.670410000  |
| C  | 2.890189000  | 1.055943000  | -0.043280000 |
| H  | 1.105598000  | 2.278927000  | -0.009761000 |
| O  | -0.163940000 | -1.999520000 | -0.281389000 |
| Cl | -5.170396000 | -1.020741000 | 0.106230000  |
| Cl | -4.353426000 | 2.075909000  | 0.074366000  |
| Cl | 5.013194000  | -0.696816000 | -0.248001000 |
| Cl | 3.891910000  | 2.492030000  | 0.216985000  |
| O  | 2.590982000  | -2.793918000 | 0.573848000  |
| H  | 1.478810000  | -1.438908000 | -1.391219000 |

P2-d-2:

|    |              |              |              |
|----|--------------|--------------|--------------|
| C  | -3.075983000 | 0.826315000  | 0.170660000  |
| C  | -1.709460000 | 1.069555000  | 0.288476000  |
| C  | -0.811497000 | 0.040263000  | 0.018702000  |
| C  | -1.298650000 | -1.212661000 | -0.368794000 |
| C  | -2.649568000 | -1.478940000 | -0.501367000 |
| C  | -3.540919000 | -0.440680000 | -0.223023000 |
| H  | -1.370810000 | 2.052183000  | 0.590971000  |
| H  | -3.008705000 | -2.451586000 | -0.807815000 |
| C  | 0.953324000  | -1.497924000 | -0.259925000 |
| C  | 0.644556000  | -0.030119000 | -0.016475000 |
| C  | 1.430224000  | -2.184915000 | 1.027310000  |
| C  | 1.520405000  | 0.994563000  | 0.071034000  |
| C  | 3.711855000  | -0.158343000 | -0.114947000 |
| H  | 0.606586000  | -2.471354000 | 1.712166000  |
| C  | 2.961853000  | 0.933027000  | -0.078507000 |
| H  | 1.120612000  | 1.990307000  | 0.225377000  |
| O  | -0.306347000 | -2.113921000 | -0.620196000 |
| Cl | -5.247441000 | -0.764317000 | -0.375013000 |
| Cl | -4.187858000 | 2.127070000  | 0.527117000  |

|    |             |              |              |
|----|-------------|--------------|--------------|
| Cl | 5.334157000 | -0.515454000 | -0.224755000 |
| Cl | 3.744431000 | 2.533175000  | -0.284945000 |
| O  | 2.583234000 | -2.396566000 | 1.287081000  |
| H  | 1.684470000 | -1.664549000 | -1.055477000 |

RC3:

|    |              |              |              |
|----|--------------|--------------|--------------|
| C  | 3.124071000  | 0.709197000  | -0.160429000 |
| C  | 1.787831000  | 1.087055000  | -0.218505000 |
| C  | 0.807212000  | 0.099534000  | -0.128620000 |
| C  | 1.196953000  | -1.240871000 | 0.026243000  |
| C  | 2.517351000  | -1.643479000 | 0.088024000  |
| C  | 3.486042000  | -0.645861000 | -0.009957000 |
| H  | 1.530401000  | 2.132539000  | -0.323001000 |
| H  | 2.795738000  | -2.681264000 | 0.207948000  |
| C  | -0.992867000 | -1.270394000 | 0.003763000  |
| C  | -0.636521000 | 0.077363000  | -0.147040000 |
| C  | -2.302529000 | -1.709277000 | 0.037324000  |
| C  | -1.646006000 | 1.040552000  | -0.264538000 |
| C  | -3.303471000 | -0.743037000 | -0.091781000 |
| H  | -2.552343000 | -2.754321000 | 0.159099000  |
| C  | -2.980473000 | 0.614935000  | -0.251903000 |
| H  | -1.419518000 | 2.081123000  | -0.443998000 |
| O  | 0.111208000  | -2.079201000 | 0.109577000  |
| Cl | 5.162055000  | -1.123276000 | 0.062188000  |
| Cl | 4.344985000  | 1.954717000  | -0.277046000 |
| Cl | -4.964320000 | -1.276282000 | -0.057334000 |
| Cl | -4.229834000 | 1.819389000  | -0.447492000 |
| O  | -1.331199000 | 1.812232000  | 2.019887000  |
| H  | -2.258975000 | 1.736055000  | 2.303388000  |

TS3:

|   |              |              |              |
|---|--------------|--------------|--------------|
| C | 3.257670000  | 0.773399000  | -0.002627000 |
| C | 1.930786000  | 1.185670000  | -0.007108000 |
| C | 0.924916000  | 0.217896000  | -0.041194000 |
| C | 1.283489000  | -1.142009000 | -0.071139000 |
| C | 2.594827000  | -1.577406000 | -0.068244000 |
| C | 3.587356000  | -0.598523000 | -0.032842000 |
| H | 1.700576000  | 2.242732000  | 0.016111000  |
| H | 2.849015000  | -2.628058000 | -0.091578000 |
| C | -0.909072000 | -1.118827000 | -0.097098000 |

|    |              |              |              |
|----|--------------|--------------|--------------|
| C  | -0.517536000 | 0.235592000  | -0.062981000 |
| C  | -2.218265000 | -1.525878000 | -0.141338000 |
| C  | -1.499539000 | 1.234901000  | -0.063904000 |
| C  | -3.218011000 | -0.519552000 | -0.080534000 |
| H  | -2.504970000 | -2.566606000 | -0.187025000 |
| C  | -2.830750000 | 0.864730000  | -0.103899000 |
| H  | -1.237348000 | 2.284582000  | -0.049792000 |
| O  | 0.182638000  | -1.958269000 | -0.101579000 |
| Cl | 5.250237000  | -1.119444000 | -0.025898000 |
| Cl | 4.506929000  | 1.994407000  | 0.041235000  |
| Cl | -4.821663000 | -0.976569000 | -0.593373000 |
| Cl | -4.045736000 | 2.104672000  | -0.130207000 |
| O  | -3.613403000 | -0.690007000 | 1.929838000  |
| H  | -2.802417000 | -0.378511000 | 2.363795000  |

P3:

|    |              |              |              |
|----|--------------|--------------|--------------|
| C  | -3.164944000 | 0.780286000  | 0.179755000  |
| C  | -1.860100000 | 1.258177000  | 0.215824000  |
| C  | -0.816048000 | 0.381615000  | -0.081244000 |
| C  | -1.118154000 | -0.952112000 | -0.408412000 |
| C  | -2.405761000 | -1.452699000 | -0.450946000 |
| C  | -3.436604000 | -0.565276000 | -0.150846000 |
| H  | -1.678415000 | 2.293236000  | 0.473641000  |
| H  | -2.611233000 | -2.483901000 | -0.702612000 |
| C  | 1.059472000  | -0.804318000 | -0.514069000 |
| C  | 0.624939000  | 0.471173000  | -0.156027000 |
| C  | 2.402349000  | -1.134428000 | -0.697059000 |
| C  | 1.574125000  | 1.496920000  | 0.002366000  |
| C  | 3.351307000  | -0.084473000 | -0.518312000 |
| H  | 2.692454000  | -2.057099000 | -1.177316000 |
| C  | 2.918167000  | 1.215776000  | -0.183374000 |
| H  | 1.275377000  | 2.500668000  | 0.276581000  |
| O  | 0.018326000  | -1.672309000 | -0.678256000 |
| Cl | -5.073203000 | -1.163986000 | -0.194946000 |
| Cl | -4.462987000 | 1.887530000  | 0.554403000  |
| Cl | 3.270902000  | -2.426513000 | 1.325516000  |
| Cl | 4.104981000  | 2.477286000  | 0.022568000  |
| O  | 4.659824000  | -0.307638000 | -0.676115000 |
| H  | 4.849358000  | -1.240559000 | -0.489449000 |

RC4:



|    |              |              |              |
|----|--------------|--------------|--------------|
| C  | 3.123973000  | 0.709110000  | -0.160345000 |
| C  | 1.787736000  | 1.086990000  | -0.218443000 |
| C  | 0.807103000  | 0.099440000  | -0.129021000 |
| C  | 1.196817000  | -1.240990000 | 0.025688000  |
| C  | 2.517205000  | -1.643629000 | 0.087598000  |
| C  | 3.485894000  | -0.645971000 | -0.010067000 |
| H  | 1.530318000  | 2.132504000  | -0.322683000 |
| H  | 2.795595000  | -2.681422000 | 0.207426000  |
| C  | -0.993021000 | -1.270498000 | 0.003320000  |
| C  | -0.636661000 | 0.077308000  | -0.147433000 |
| C  | -2.302691000 | -1.709306000 | 0.037382000  |
| C  | -1.646116000 | 1.040527000  | -0.264917000 |
| C  | -3.303600000 | -0.742965000 | -0.091507000 |
| H  | -2.552558000 | -2.754320000 | 0.159361000  |
| C  | -2.980615000 | 0.614965000  | -0.252088000 |
| H  | -1.419623000 | 2.081128000  | -0.444220000 |
| O  | 0.111053000  | -2.079325000 | 0.108955000  |
| Cl | 5.161926000  | -1.123375000 | 0.062205000  |
| Cl | 4.344931000  | 1.954625000  | -0.276555000 |
| Cl | -4.964534000 | -1.276048000 | -0.056091000 |
| Cl | -4.229974000 | 1.819342000  | -0.447906000 |
| O  | -1.329057000 | 1.813467000  | 2.019303000  |
| H  | -2.255766000 | 1.731831000  | 2.304960000  |

TS4:

|    |              |              |              |
|----|--------------|--------------|--------------|
| C  | 3.226007000  | 0.765840000  | -0.044428000 |
| C  | 1.888988000  | 1.153722000  | -0.065760000 |
| C  | 0.903611000  | 0.169309000  | -0.056076000 |
| C  | 1.289792000  | -1.178768000 | -0.022301000 |
| C  | 2.606220000  | -1.593219000 | 0.000968000  |
| C  | 3.582264000  | -0.596169000 | -0.011040000 |
| H  | 1.640824000  | 2.206691000  | -0.088386000 |
| H  | 2.878166000  | -2.639336000 | 0.027495000  |
| C  | -0.902795000 | -1.208746000 | -0.047375000 |
| C  | -0.547451000 | 0.153055000  | -0.067841000 |
| C  | -2.216198000 | -1.665804000 | -0.083447000 |
| C  | -1.548409000 | 1.107769000  | -0.114623000 |
| C  | -3.214689000 | -0.714877000 | -0.126168000 |
| H  | -2.447819000 | -2.721976000 | -0.089221000 |
| C  | -2.903521000 | 0.689744000  | -0.040401000 |
| H  | -1.334126000 | 2.166668000  | -0.172300000 |
| O  | 0.196095000  | -2.018417000 | -0.016203000 |
| Cl | 5.255658000  | -1.087590000 | 0.016705000  |

|    |              |              |              |
|----|--------------|--------------|--------------|
| Cl | 4.449904000  | 2.013644000  | -0.058119000 |
| Cl | -4.865818000 | -1.232113000 | -0.178667000 |
| Cl | -4.108829000 | 1.864841000  | -0.556013000 |
| O  | -3.078056000 | 0.797782000  | 1.957232000  |
| H  | -3.089837000 | 1.762605000  | 2.058730000  |

P4:

|    |              |              |              |
|----|--------------|--------------|--------------|
| C  | -3.030564000 | 0.580664000  | -0.274322000 |
| C  | -1.703938000 | 0.962801000  | -0.428997000 |
| C  | -0.704754000 | 0.011433000  | -0.218944000 |
| C  | -1.069881000 | -1.293838000 | 0.156756000  |
| C  | -2.381569000 | -1.698342000 | 0.320957000  |
| C  | -3.367486000 | -0.740366000 | 0.097049000  |
| H  | -1.466589000 | 1.983851000  | -0.695962000 |
| H  | -2.638854000 | -2.707451000 | 0.611505000  |
| C  | 1.116204000  | -1.292083000 | 0.083435000  |
| C  | 0.735830000  | 0.002005000  | -0.264182000 |
| C  | 2.440967000  | -1.722857000 | 0.122628000  |
| C  | 1.734677000  | 0.947322000  | -0.575853000 |
| C  | 3.428576000  | -0.793459000 | -0.183866000 |
| H  | 2.697452000  | -2.738093000 | 0.394063000  |
| C  | 3.100665000  | 0.533809000  | -0.522319000 |
| H  | 1.491956000  | 1.850325000  | -1.116741000 |
| O  | 0.032433000  | -2.090324000 | 0.339860000  |
| Cl | -5.032596000 | -1.217694000 | 0.292080000  |
| Cl | -4.274472000 | 1.776337000  | -0.543001000 |
| Cl | 5.102383000  | -1.270008000 | -0.130741000 |
| Cl | 1.932222000  | 2.587654000  | 1.275322000  |
| O  | 4.088222000  | 1.395132000  | -0.799270000 |
| H  | 3.790300000  | 2.293462000  | -0.583848000 |

RC5:

|   |             |              |              |
|---|-------------|--------------|--------------|
| C | 3.124082000 | 0.709258000  | -0.160181000 |
| C | 1.787847000 | 1.087147000  | -0.218246000 |
| C | 0.807209000 | 0.099591000  | -0.128953000 |
| C | 1.196928000 | -1.240869000 | 0.025550000  |
| C | 2.517312000 | -1.643524000 | 0.087395000  |
| C | 3.485996000 | -0.645845000 | -0.010115000 |
| H | 1.530440000 | 2.132677000  | -0.322363000 |

|    |              |              |              |
|----|--------------|--------------|--------------|
| H  | 2.795705000  | -2.681336000 | 0.207040000  |
| C  | -0.992903000 | -1.270365000 | 0.003121000  |
| C  | -0.636539000 | 0.077444000  | -0.147444000 |
| C  | -2.302590000 | -1.709180000 | 0.037128000  |
| C  | -1.646002000 | 1.040710000  | -0.264629000 |
| C  | -3.303486000 | -0.742826000 | -0.091645000 |
| H  | -2.552429000 | -2.754218000 | 0.158964000  |
| C  | -2.980511000 | 0.615138000  | -0.252047000 |
| H  | -1.419500000 | 2.081329000  | -0.443784000 |
| O  | 0.111154000  | -2.079217000 | 0.108661000  |
| Cl | 5.162036000  | -1.123262000 | 0.062077000  |
| Cl | 4.345037000  | 1.954791000  | -0.276177000 |
| Cl | -4.964439000 | -1.275893000 | -0.056323000 |
| Cl | -4.229863000 | 1.819474000  | -0.447914000 |
| O  | -1.330897000 | 1.811267000  | 2.019704000  |
| H  | -2.257417000 | 1.728212000  | 2.305354000  |

TS5:

|    |              |              |              |
|----|--------------|--------------|--------------|
| C  | 3.128732000  | 0.714441000  | -0.132780000 |
| C  | 1.792703000  | 1.093437000  | -0.169078000 |
| C  | 0.812759000  | 0.102555000  | -0.095340000 |
| C  | 1.204544000  | -1.241948000 | 0.025661000  |
| C  | 2.525550000  | -1.645137000 | 0.065945000  |
| C  | 3.492548000  | -0.644643000 | -0.018420000 |
| H  | 1.532739000  | 2.140841000  | -0.242521000 |
| H  | 2.805790000  | -2.685164000 | 0.159180000  |
| C  | -0.984856000 | -1.267134000 | 0.023454000  |
| C  | -0.627798000 | 0.079855000  | -0.102011000 |
| C  | -2.296020000 | -1.708055000 | 0.047909000  |
| C  | -1.640492000 | 1.060698000  | -0.170888000 |
| C  | -3.300250000 | -0.739122000 | -0.072516000 |
| H  | -2.545354000 | -2.755341000 | 0.149430000  |
| C  | -2.984236000 | 0.618173000  | -0.216827000 |
| H  | -1.417984000 | 2.075710000  | -0.461554000 |
| O  | 0.119284000  | -2.080379000 | 0.102613000  |
| Cl | 5.168903000  | -1.122248000 | 0.025910000  |
| Cl | 4.348932000  | 1.961758000  | -0.229127000 |
| Cl | -4.958202000 | -1.282801000 | -0.065156000 |
| Cl | -4.224503000 | 1.813772000  | -0.439838000 |
| O  | -1.473534000 | 1.853690000  | 1.776806000  |
| H  | -1.977503000 | 1.200590000  | 2.289038000  |

## IM5:

|    |              |              |              |
|----|--------------|--------------|--------------|
| C  | 3.137245000  | 0.705907000  | -0.077775000 |
| C  | 1.803309000  | 1.090405000  | -0.090544000 |
| C  | 0.817682000  | 0.096406000  | -0.045477000 |
| C  | 1.214487000  | -1.255998000 | 0.025759000  |
| C  | 2.534584000  | -1.660035000 | 0.042340000  |
| C  | 3.502546000  | -0.657019000 | -0.012599000 |
| H  | 1.542772000  | 2.139511000  | -0.126391000 |
| H  | 2.815270000  | -2.702878000 | 0.095142000  |
| C  | -0.974492000 | -1.261122000 | 0.029782000  |
| C  | -0.611816000 | 0.070717000  | -0.045531000 |
| C  | -2.289110000 | -1.727710000 | 0.054497000  |
| C  | -1.630633000 | 1.164631000  | -0.083737000 |
| C  | -3.313469000 | -0.748968000 | -0.026001000 |
| H  | -2.526905000 | -2.778927000 | 0.124875000  |
| C  | -3.040508000 | 0.594205000  | -0.114631000 |
| H  | -1.494616000 | 1.784267000  | -0.978118000 |
| O  | 0.126743000  | -2.086052000 | 0.074998000  |
| Cl | 5.179536000  | -1.136874000 | 0.004910000  |
| Cl | 4.360262000  | 1.954322000  | -0.138746000 |
| Cl | -4.960061000 | -1.342743000 | -0.023893000 |
| Cl | -4.292983000 | 1.779788000  | -0.277254000 |
| O  | -1.449794000 | 2.103105000  | 0.989599000  |
| H  | -1.525878000 | 1.626718000  | 1.825920000  |

## TS5-a:

|   |              |              |              |
|---|--------------|--------------|--------------|
| C | 3.282324000  | 0.715888000  | -0.020156000 |
| C | 1.982776000  | 1.190881000  | 0.080525000  |
| C | 0.927453000  | 0.271799000  | 0.084622000  |
| C | 1.221844000  | -1.107306000 | -0.015754000 |
| C | 2.510143000  | -1.598916000 | -0.129498000 |
| C | 3.545890000  | -0.668237000 | -0.126395000 |
| H | 1.800748000  | 2.254610000  | 0.154703000  |
| H | 2.713307000  | -2.657757000 | -0.216375000 |
| C | -0.965867000 | -0.946183000 | 0.119285000  |
| C | -0.497416000 | 0.333443000  | 0.140842000  |
| C | -2.298863000 | -1.466033000 | 0.165146000  |
| C | -2.451854000 | 1.502162000  | 0.913276000  |
| C | -3.381557000 | -0.648089000 | 0.094364000  |
| H | -2.426251000 | -2.541384000 | 0.200517000  |
| C | -3.232749000 | 0.788854000  | 0.034063000  |
| H | -2.226296000 | 2.542281000  | 0.719508000  |
| O | 0.084651000  | -1.859355000 | 0.004600000  |

|    |              |              |              |
|----|--------------|--------------|--------------|
| Cl | 5.182425000  | -1.262131000 | -0.261151000 |
| Cl | 4.593043000  | 1.875757000  | -0.017008000 |
| Cl | -4.993692000 | -1.330613000 | -0.051057000 |
| Cl | -3.864559000 | 1.632732000  | -1.364583000 |
| O  | -2.190968000 | 1.157311000  | 2.188180000  |
| H  | -2.456398000 | 0.241345000  | 2.352050000  |

IM5-a:

|    |              |              |              |
|----|--------------|--------------|--------------|
| C  | 3.424299000  | 0.749799000  | -0.055895000 |
| C  | 2.134263000  | 1.259421000  | -0.023976000 |
| C  | 1.061356000  | 0.362527000  | -0.006507000 |
| C  | 1.322193000  | -1.025258000 | -0.024390000 |
| C  | 2.601888000  | -1.550097000 | -0.060896000 |
| C  | 3.658526000  | -0.643950000 | -0.075135000 |
| H  | 1.973993000  | 2.328951000  | -0.012267000 |
| H  | 2.781330000  | -2.616646000 | -0.077971000 |
| C  | -0.881483000 | -0.819920000 | 0.027103000  |
| C  | -0.358024000 | 0.431456000  | 0.012682000  |
| C  | -2.204028000 | -1.383140000 | 0.042216000  |
| C  | -3.102305000 | 1.538091000  | 1.122835000  |
| C  | -3.347987000 | -0.670057000 | 0.012864000  |
| H  | -2.252769000 | -2.465976000 | 0.046585000  |
| C  | -3.439896000 | 0.785786000  | 0.059921000  |
| H  | -3.195552000 | 2.616063000  | 1.102186000  |
| O  | 0.166196000  | -1.748613000 | -0.004119000 |
| Cl | 5.283604000  | -1.279676000 | -0.118520000 |
| Cl | 4.760463000  | 1.877991000  | -0.074062000 |
| Cl | -4.881615000 | -1.538036000 | -0.093554000 |
| Cl | -4.109310000 | 1.591206000  | -1.359318000 |
| O  | -2.646385000 | 1.089885000  | 2.307678000  |
| H  | -2.581711000 | 0.124241000  | 2.300767000  |

TS5-a-1: :

|   |              |              |              |
|---|--------------|--------------|--------------|
| C | 3.525009000  | 0.754399000  | -0.147195000 |
| C | 2.243494000  | 1.289654000  | -0.131240000 |
| C | 1.156871000  | 0.416526000  | -0.036611000 |
| C | 1.393203000  | -0.970163000 | 0.051231000  |
| C | 2.660438000  | -1.520927000 | 0.061978000  |
| C | 3.733948000  | -0.638719000 | -0.046616000 |
| H | 2.101704000  | 2.359641000  | -0.200977000 |
| H | 2.820866000  | -2.586886000 | 0.150590000  |
| C | -0.810969000 | -0.731886000 | 0.093215000  |

|    |              |              |              |
|----|--------------|--------------|--------------|
| C  | -0.260085000 | 0.522714000  | 0.080149000  |
| C  | -2.123277000 | -1.290728000 | 0.112400000  |
| C  | -3.154476000 | 1.714505000  | 0.876533000  |
| C  | -3.325129000 | -0.663023000 | 0.040468000  |
| H  | -2.133572000 | -2.372926000 | 0.161688000  |
| C  | -3.651491000 | 0.751716000  | 0.064250000  |
| H  | -3.596865000 | 2.704448000  | 0.841153000  |
| O  | 0.220341000  | -1.668465000 | 0.151531000  |
| Cl | 5.344931000  | -1.306642000 | -0.050324000 |
| Cl | 4.878551000  | 1.850988000  | -0.285994000 |
| Cl | -4.722690000 | -1.740295000 | -0.045989000 |
| Cl | -4.935815000 | 1.288191000  | -1.031516000 |
| O  | -2.181074000 | 1.603883000  | 1.786184000  |
| H  | -1.436080000 | 1.039859000  | 1.469450000  |

P5-a-1:

|    |              |              |              |
|----|--------------|--------------|--------------|
| C  | 3.503452000  | 0.742336000  | -0.329886000 |
| C  | 2.220011000  | 1.225384000  | -0.522458000 |
| C  | 1.134226000  | 0.372957000  | -0.264380000 |
| C  | 1.387820000  | -0.942112000 | 0.179217000  |
| C  | 2.659300000  | -1.445340000 | 0.376848000  |
| C  | 3.724082000  | -0.583882000 | 0.116942000  |
| H  | 2.071448000  | 2.242093000  | -0.861148000 |
| H  | 2.830936000  | -2.457077000 | 0.717067000  |
| C  | -0.806617000 | -0.732747000 | 0.057811000  |
| C  | -0.276428000 | 0.490465000  | -0.338407000 |
| C  | -2.091869000 | -1.276626000 | 0.121249000  |
| C  | -3.029954000 | 1.534201000  | 1.257918000  |
| C  | -3.330061000 | -0.623941000 | -0.068025000 |
| H  | -2.127704000 | -2.355550000 | 0.220578000  |
| C  | -3.689116000 | 0.670297000  | 0.256826000  |
| H  | -3.549887000 | 2.499871000  | 1.396440000  |
| O  | 0.224898000  | -1.614919000 | 0.369073000  |
| Cl | 5.340806000  | -1.187368000 | 0.355964000  |
| Cl | 4.851690000  | 1.807872000  | -0.650725000 |
| Cl | -4.553464000 | -1.682919000 | -0.781121000 |
| Cl | -5.180608000 | 1.361730000  | -0.342768000 |
| O  | -2.049806000 | 1.246211000  | 1.910693000  |
| H  | -0.847815000 | 1.346032000  | -0.655959000 |

TS5-a-2: :

|   |             |             |              |
|---|-------------|-------------|--------------|
| C | 3.322514000 | 0.796275000 | -0.105296000 |
|---|-------------|-------------|--------------|

|    |              |              |              |
|----|--------------|--------------|--------------|
| C  | 1.996333000  | 1.203628000  | -0.052833000 |
| C  | 0.990538000  | 0.231696000  | -0.033295000 |
| C  | 1.365004000  | -1.133985000 | -0.072230000 |
| C  | 2.679777000  | -1.558148000 | -0.126828000 |
| C  | 3.664207000  | -0.572785000 | -0.142192000 |
| H  | 1.757397000  | 2.258312000  | -0.028733000 |
| H  | 2.941903000  | -2.607153000 | -0.157225000 |
| C  | -0.810267000 | -1.089574000 | 0.006570000  |
| C  | -0.440633000 | 0.210336000  | 0.012053000  |
| C  | -2.184046000 | -1.504081000 | 0.032895000  |
| C  | -2.634158000 | 1.701836000  | 1.219009000  |
| C  | -3.046709000 | -0.471003000 | 0.061944000  |
| H  | -2.492471000 | -2.540736000 | 0.015937000  |
| C  | -2.541685000 | 0.932228000  | 0.076737000  |
| H  | -2.509673000 | 2.775678000  | 1.203739000  |
| O  | 0.267442000  | -1.953833000 | -0.050130000 |
| Cl | 5.334218000  | -1.082196000 | -0.209100000 |
| Cl | 4.567256000  | 2.027538000  | -0.127257000 |
| Cl | -4.784585000 | -0.693446000 | 0.064315000  |
| Cl | -2.685695000 | 1.816141000  | -1.459085000 |
| O  | -2.745143000 | 1.198916000  | 2.454992000  |
| H  | -2.845768000 | 0.235628000  | 2.422173000  |

P5-a-2:

|    |              |              |              |
|----|--------------|--------------|--------------|
| C  | 2.865033000  | 0.757856000  | 0.119569000  |
| C  | 1.480491000  | 0.928150000  | 0.188167000  |
| C  | 0.651829000  | -0.186423000 | 0.086549000  |
| C  | 1.251605000  | -1.451714000 | -0.090849000 |
| C  | 2.607646000  | -1.649840000 | -0.163617000 |
| C  | 3.425322000  | -0.515947000 | -0.054005000 |
| H  | 1.078348000  | 1.924076000  | 0.316265000  |
| H  | 3.036492000  | -2.632882000 | -0.300362000 |
| C  | -0.891962000 | -1.869653000 | -0.072671000 |
| C  | -0.770668000 | -0.440339000 | 0.107213000  |
| C  | -2.222120000 | -2.290409000 | -0.079415000 |
| C  | -2.431547000 | 1.490876000  | 0.421625000  |
| C  | -2.929226000 | -1.099266000 | 0.100719000  |
| H  | -2.629118000 | -3.280996000 | -0.189045000 |
| C  | -2.042514000 | 0.071018000  | 0.229690000  |
| H  | -1.563823000 | 2.108565000  | 0.629964000  |
| O  | 0.304507000  | -2.478232000 | -0.186727000 |
| Cl | 5.150535000  | -0.743042000 | -0.142467000 |
| Cl | 3.877089000  | 2.175408000  | 0.252168000  |

|    |              |              |              |
|----|--------------|--------------|--------------|
| Cl | -4.652464000 | -1.009370000 | 0.166554000  |
| Cl | -3.040608000 | 2.168457000  | -1.232763000 |
| O  | -3.358341000 | 1.748375000  | 1.408384000  |
| H  | -4.141942000 | 1.199533000  | 1.272693000  |

TS5-b:

|    |              |              |              |
|----|--------------|--------------|--------------|
| C  | -3.289923000 | 0.625705000  | -0.139476000 |
| C  | -2.001967000 | 1.152141000  | -0.041236000 |
| C  | -0.924472000 | 0.287920000  | 0.154696000  |
| C  | -1.181607000 | -1.085439000 | 0.277155000  |
| C  | -2.446810000 | -1.632555000 | 0.194803000  |
| C  | -3.510858000 | -0.756342000 | -0.025581000 |
| H  | -1.887977000 | 2.226120000  | -0.106870000 |
| H  | -2.612847000 | -2.696226000 | 0.295158000  |
| C  | 1.026409000  | -0.903726000 | 0.478475000  |
| C  | 0.508482000  | 0.441520000  | 0.398406000  |
| C  | 2.272944000  | -1.440551000 | 0.349607000  |
| C  | 1.221721000  | 1.590409000  | 0.638121000  |
| C  | 3.479186000  | -0.730294000 | 0.040004000  |
| H  | 2.332033000  | -2.521398000 | 0.369679000  |
| C  | 3.635204000  | 0.598081000  | 0.050306000  |
| H  | 2.113496000  | 1.604560000  | 1.242425000  |
| O  | -0.042535000 | -1.798091000 | 0.506493000  |
| Cl | -5.115586000 | -1.427258000 | -0.152229000 |
| Cl | -4.616713000 | 1.733646000  | -0.400993000 |
| Cl | 4.803153000  | -1.783125000 | -0.558645000 |
| Cl | 4.998351000  | 1.563217000  | -0.206723000 |
| O  | 0.795834000  | 2.827449000  | 0.333627000  |
| H  | 0.122560000  | 2.800709000  | -0.356997000 |

IM5-b:

|   |              |              |              |
|---|--------------|--------------|--------------|
| C | 3.397687000  | 0.596461000  | 0.088807000  |
| C | 2.124195000  | 1.171703000  | 0.088823000  |
| C | 1.001647000  | 0.353955000  | -0.027498000 |
| C | 1.197077000  | -1.024119000 | -0.171035000 |
| C | 2.441186000  | -1.621625000 | -0.182842000 |
| C | 3.554694000  | -0.789630000 | -0.043326000 |
| H | 2.069984000  | 2.250261000  | 0.163518000  |
| H | 2.555830000  | -2.690613000 | -0.296897000 |
| C | -1.028924000 | -0.772299000 | -0.227889000 |
| C | -0.447353000 | 0.568124000  | -0.116970000 |
| C | -2.266271000 | -1.324934000 | -0.187035000 |



|    |              |              |              |
|----|--------------|--------------|--------------|
| C  | -1.125155000 | 1.743880000  | -0.148624000 |
| C  | -3.557940000 | -0.704573000 | -0.032214000 |
| H  | -2.279930000 | -2.406672000 | -0.239330000 |
| C  | -3.902931000 | 0.563302000  | -0.211592000 |
| H  | -2.179624000 | 1.790766000  | -0.388207000 |
| O  | 0.019873000  | -1.693180000 | -0.312531000 |
| Cl | 5.136370000  | -1.525250000 | -0.044243000 |
| Cl | 4.780301000  | 1.654534000  | 0.249399000  |
| Cl | -4.832922000 | -1.846774000 | 0.515804000  |
| Cl | -5.324386000 | 1.449217000  | -0.181823000 |
| O  | -0.604367000 | 2.962541000  | 0.081057000  |
| H  | 0.273061000  | 2.900547000  | 0.475779000  |

TS5-b-1: :

|    |              |              |              |
|----|--------------|--------------|--------------|
| C  | 2.812096000  | 0.645582000  | -0.234195000 |
| C  | 1.480408000  | 1.016161000  | -0.007685000 |
| C  | 0.548636000  | 0.033548000  | 0.294104000  |
| C  | 0.953755000  | -1.309406000 | 0.341882000  |
| C  | 2.259319000  | -1.700091000 | 0.135458000  |
| C  | 3.195074000  | -0.698691000 | -0.153618000 |
| H  | 1.199108000  | 2.056432000  | -0.120538000 |
| H  | 2.557119000  | -2.738477000 | 0.183909000  |
| C  | -1.240224000 | -1.395938000 | 0.545733000  |
| C  | -0.876443000 | 0.039786000  | 0.707856000  |
| C  | -2.423075000 | -1.791302000 | 0.063029000  |
| C  | -1.279936000 | 0.766380000  | 1.828697000  |
| C  | -3.237689000 | -0.665710000 | -0.386104000 |
| H  | -2.694869000 | -2.820447000 | -0.124300000 |
| C  | -2.608603000 | 0.503839000  | -0.579359000 |
| H  | -2.207238000 | 0.556376000  | 2.344733000  |
| O  | -0.086522000 | -2.172238000 | 0.606872000  |
| Cl | 4.847786000  | -1.182435000 | -0.426456000 |
| Cl | 3.963441000  | 1.897881000  | -0.629270000 |
| Cl | -4.949904000 | -0.943364000 | -0.705451000 |
| Cl | -3.315001000 | 2.050002000  | -0.764038000 |
| O  | -0.647243000 | 1.843176000  | 2.317477000  |
| H  | 0.228611000  | 1.938249000  | 1.915271000  |

P5-b-1:

|   |             |              |              |
|---|-------------|--------------|--------------|
| C | 2.581265000 | 0.656688000  | -0.295351000 |
| C | 1.221114000 | 0.951724000  | -0.118245000 |
| C | 0.343107000 | -0.076784000 | 0.174082000  |

|    |              |              |              |
|----|--------------|--------------|--------------|
| C  | 0.827770000  | -1.388728000 | 0.284174000  |
| C  | 2.159749000  | -1.705625000 | 0.131917000  |
| C  | 3.042115000  | -0.657122000 | -0.159883000 |
| H  | 0.879083000  | 1.972087000  | -0.241090000 |
| H  | 2.517487000  | -2.722252000 | 0.218966000  |
| C  | -1.340663000 | -1.608012000 | 0.398734000  |
| C  | -1.115966000 | -0.123175000 | 0.585472000  |
| C  | -2.518725000 | -1.889414000 | -0.169567000 |
| C  | -1.258639000 | 0.246302000  | 2.064841000  |
| C  | -3.142347000 | -0.585331000 | -0.464052000 |
| H  | -2.905082000 | -2.843460000 | -0.493296000 |
| C  | -2.307750000 | 0.440253000  | -0.172250000 |
| H  | -2.198987000 | 0.019173000  | 2.552650000  |
| O  | -0.171983000 | -2.320372000 | 0.522983000  |
| Cl | 4.729527000  | -1.047517000 | -0.366167000 |
| Cl | 3.667171000  | 1.966171000  | -0.689679000 |
| Cl | -4.734039000 | -0.455864000 | -1.126513000 |
| Cl | -2.640478000 | 2.127909000  | -0.303997000 |
| O  | -0.678782000 | 1.378236000  | 2.543629000  |
| H  | 0.190359000  | 1.505012000  | 2.138701000  |

TS5-c:

|    |              |              |              |
|----|--------------|--------------|--------------|
| C  | 3.127827000  | 0.725589000  | -0.098100000 |
| C  | 1.795108000  | 1.115285000  | 0.040122000  |
| C  | 0.825050000  | 0.133348000  | 0.179909000  |
| C  | 1.203164000  | -1.214929000 | 0.201517000  |
| C  | 2.513443000  | -1.630007000 | 0.083184000  |
| C  | 3.482395000  | -0.634882000 | -0.071699000 |
| H  | 1.540758000  | 2.167102000  | 0.043672000  |
| H  | 2.787113000  | -2.675877000 | 0.099141000  |
| C  | -1.001446000 | -1.264565000 | 0.305865000  |
| C  | -0.629826000 | 0.138738000  | 0.443671000  |
| C  | -2.261654000 | -1.693351000 | 0.085850000  |
| C  | -1.669334000 | 1.207439000  | 0.187840000  |
| C  | -3.293138000 | -0.694027000 | -0.100499000 |
| H  | -2.503961000 | -2.741657000 | -0.017530000 |
| C  | -3.028262000 | 0.635379000  | -0.130398000 |
| H  | -1.397295000 | 1.994884000  | -0.520677000 |
| O  | 0.119657000  | -2.060365000 | 0.337768000  |
| Cl | 5.144135000  | -1.133524000 | -0.238604000 |
| Cl | 4.338183000  | 1.968201000  | -0.295137000 |
| Cl | -4.903931000 | -1.317220000 | -0.367767000 |
| Cl | -4.239847000 | 1.829348000  | -0.459261000 |

|   |              |             |             |
|---|--------------|-------------|-------------|
| O | -1.595112000 | 1.677547000 | 1.552263000 |
| H | -0.758117000 | 0.478307000 | 1.644655000 |

IM5-c:

|    |              |              |              |
|----|--------------|--------------|--------------|
| C  | 3.120425000  | 0.689174000  | 0.136118000  |
| C  | 1.785714000  | 1.063077000  | 0.314644000  |
| C  | 0.808930000  | 0.081547000  | 0.273642000  |
| C  | 1.175221000  | -1.245381000 | 0.057662000  |
| C  | 2.482479000  | -1.652184000 | -0.111922000 |
| C  | 3.463199000  | -0.656711000 | -0.070477000 |
| H  | 1.527430000  | 2.102322000  | 0.468281000  |
| H  | 2.746096000  | -2.687765000 | -0.275778000 |
| C  | -1.034981000 | -1.322171000 | 0.189850000  |
| C  | -0.672172000 | 0.104002000  | 0.482915000  |
| C  | -2.298020000 | -1.735453000 | -0.006438000 |
| C  | -1.580188000 | 1.049265000  | -0.437889000 |
| C  | -3.331163000 | -0.716905000 | -0.011462000 |
| H  | -2.548634000 | -2.767066000 | -0.211833000 |
| C  | -3.031763000 | 0.598765000  | -0.165119000 |
| H  | -1.344265000 | 0.749600000  | -1.483075000 |
| O  | 0.081417000  | -2.095698000 | 0.021884000  |
| Cl | 5.124283000  | -1.139973000 | -0.289590000 |
| Cl | 4.342716000  | 1.935323000  | 0.175603000  |
| Cl | -4.975445000 | -1.287809000 | 0.136691000  |
| Cl | -4.218615000 | 1.845343000  | -0.164085000 |
| O  | -1.255790000 | 2.305521000  | -0.210421000 |
| H  | -0.951676000 | 0.383146000  | 1.505043000  |

TS5-c-1: :

|   |              |              |              |
|---|--------------|--------------|--------------|
| C | -3.128560000 | 0.682504000  | -0.212372000 |
| C | -1.801134000 | 1.050026000  | -0.430149000 |
| C | -0.816096000 | 0.075273000  | -0.330371000 |
| C | -1.177098000 | -1.236790000 | -0.015055000 |
| C | -2.479924000 | -1.636561000 | 0.197878000  |
| C | -3.463661000 | -0.649309000 | 0.096043000  |
| H | -1.550072000 | 2.078133000  | -0.653933000 |
| H | -2.738466000 | -2.659428000 | 0.433796000  |
| C | 1.022677000  | -1.299998000 | -0.217326000 |
| C | 0.642581000  | 0.087264000  | -0.514897000 |
| C | 2.297779000  | -1.721879000 | -0.032108000 |
| C | 1.620656000  | 1.061647000  | 0.650974000  |
| C | 3.328412000  | -0.714781000 | -0.019561000 |

|    |              |              |              |
|----|--------------|--------------|--------------|
| H  | 2.538308000  | -2.756411000 | 0.172097000  |
| C  | 3.040292000  | 0.595964000  | 0.217564000  |
| H  | 1.353197000  | 0.543585000  | 1.597493000  |
| O  | -0.075661000 | -2.070667000 | 0.054237000  |
| Cl | -5.119936000 | -1.119608000 | 0.364940000  |
| Cl | -4.360460000 | 1.913390000  | -0.329909000 |
| Cl | 4.964886000  | -1.279961000 | -0.267672000 |
| Cl | 4.231655000  | 1.833495000  | 0.167119000  |
| O  | 1.283715000  | 2.271677000  | 0.526819000  |
| H  | 1.042584000  | 0.521510000  | -1.427762000 |

P5-c-1:

|    |              |              |              |
|----|--------------|--------------|--------------|
| C  | -3.488743000 | 0.730293000  | -0.345407000 |
| C  | -2.193150000 | 1.168245000  | -0.568756000 |
| C  | -1.130133000 | 0.299446000  | -0.276101000 |
| C  | -1.417322000 | -0.984485000 | 0.230027000  |
| C  | -2.699178000 | -1.443237000 | 0.459931000  |
| C  | -3.742736000 | -0.565562000 | 0.165780000  |
| H  | -2.018990000 | 2.162750000  | -0.957429000 |
| H  | -2.895866000 | -2.433349000 | 0.847084000  |
| C  | 0.783640000  | -0.847642000 | 0.083173000  |
| C  | 0.284805000  | 0.373150000  | -0.369115000 |
| C  | 2.059723000  | -1.424752000 | 0.160404000  |
| C  | 2.820490000  | 1.308889000  | 1.265879000  |
| C  | 3.295619000  | -0.770154000 | -0.036984000 |
| H  | 2.080742000  | -2.501192000 | 0.284745000  |
| C  | 3.595200000  | 0.544280000  | 0.269801000  |
| H  | 2.092406000  | 0.701674000  | 1.829508000  |
| O  | -0.267918000 | -1.680263000 | 0.445762000  |
| Cl | -5.372839000 | -1.112150000 | 0.443962000  |
| Cl | -4.808258000 | 1.816397000  | -0.708786000 |
| Cl | 4.544230000  | -1.798295000 | -0.735110000 |
| Cl | 4.999489000  | 1.335759000  | -0.358580000 |
| O  | 2.979563000  | 2.485031000  | 1.505042000  |
| H  | 0.874675000  | 1.192062000  | -0.747369000 |

TS5-c-2 :

|   |              |              |              |
|---|--------------|--------------|--------------|
| C | -3.179592000 | 0.674277000  | -0.096299000 |
| C | -1.855176000 | 1.104739000  | -0.216100000 |
| C | -0.846443000 | 0.155906000  | -0.225750000 |
| C | -1.169660000 | -1.191047000 | -0.107727000 |
| C | -2.464595000 | -1.654397000 | 0.007889000  |

|    |              |              |              |
|----|--------------|--------------|--------------|
| C  | -3.479194000 | -0.693396000 | 0.011478000  |
| H  | -1.633544000 | 2.161223000  | -0.293979000 |
| H  | -2.693364000 | -2.707225000 | 0.097994000  |
| C  | 1.047468000  | -1.180914000 | -0.203090000 |
| C  | 0.651352000  | 0.256711000  | -0.368742000 |
| C  | 2.302615000  | -1.654974000 | -0.053529000 |
| C  | 1.315190000  | 1.186602000  | 0.719531000  |
| C  | 3.408309000  | -0.734819000 | -0.031176000 |
| H  | 2.485504000  | -2.712607000 | 0.077805000  |
| C  | 3.253198000  | 0.602904000  | -0.011950000 |
| H  | 1.463721000  | 0.688941000  | 1.696477000  |
| O  | -0.046695000 | -1.998170000 | -0.120419000 |
| Cl | -5.126810000 | -1.246642000 | 0.160660000  |
| Cl | -4.444872000 | 1.877584000  | -0.086056000 |
| Cl | 5.013499000  | -1.455947000 | 0.147184000  |
| Cl | 4.342323000  | 1.852867000  | -0.268257000 |
| O  | 1.196947000  | 2.398651000  | 0.621270000  |
| H  | 0.944459000  | 0.662611000  | -1.342351000 |

P5-c-2:

|    |              |              |              |
|----|--------------|--------------|--------------|
| C  | -3.295277000 | 0.673350000  | -0.067667000 |
| C  | -1.986086000 | 1.164359000  | -0.097392000 |
| C  | -0.937943000 | 0.261290000  | -0.129999000 |
| C  | -1.197140000 | -1.103792000 | -0.123058000 |
| C  | -2.476745000 | -1.622770000 | -0.095477000 |
| C  | -3.534202000 | -0.708489000 | -0.067197000 |
| H  | -1.812037000 | 2.232787000  | -0.092382000 |
| H  | -2.662317000 | -2.687856000 | -0.093911000 |
| C  | 1.036092000  | -0.993051000 | -0.155143000 |
| C  | 0.566068000  | 0.448836000  | -0.173868000 |
| C  | 2.275071000  | -1.500453000 | -0.108528000 |
| C  | 1.046901000  | 1.278983000  | 1.031421000  |
| C  | 3.498001000  | -0.710700000 | -0.122166000 |
| H  | 2.386710000  | -2.576227000 | -0.056337000 |
| C  | 3.632365000  | 0.539854000  | -0.526655000 |
| H  | 1.320771000  | 0.694543000  | 1.932280000  |
| O  | -0.049583000 | -1.857016000 | -0.157130000 |
| Cl | -5.159357000 | -1.342304000 | -0.030261000 |
| Cl | -4.611922000 | 1.820918000  | -0.030473000 |
| Cl | 4.937661000  | -1.576382000 | 0.492752000  |
| Cl | 4.834023000  | 1.686680000  | -0.649681000 |
| O  | 1.063865000  | 2.479903000  | 1.020055000  |
| H  | 0.883086000  | 0.977642000  | -1.078403000 |

TS5-d:

|    |              |              |              |
|----|--------------|--------------|--------------|
| C  | 3.176705000  | 0.721762000  | -0.018023000 |
| C  | 1.850858000  | 1.126645000  | 0.052431000  |
| C  | 0.848724000  | 0.149746000  | 0.045193000  |
| C  | 1.222633000  | -1.207921000 | -0.025266000 |
| C  | 2.535211000  | -1.634540000 | -0.091569000 |
| C  | 3.518515000  | -0.647499000 | -0.089477000 |
| H  | 1.615018000  | 2.180551000  | 0.116717000  |
| H  | 2.796791000  | -2.682418000 | -0.143373000 |
| C  | -0.957902000 | -1.172757000 | 0.067165000  |
| C  | -0.582817000 | 0.141050000  | 0.110848000  |
| C  | -2.298531000 | -1.650556000 | 0.061351000  |
| C  | -1.610937000 | 1.204476000  | 0.238343000  |
| C  | -3.308390000 | -0.740568000 | 0.043888000  |
| H  | -2.501305000 | -2.713357000 | 0.071983000  |
| C  | -3.053634000 | 0.701832000  | 0.090738000  |
| H  | -1.396826000 | 2.080190000  | -0.377581000 |
| O  | 0.119614000  | -2.019008000 | -0.012725000 |
| Cl | 5.186349000  | -1.151859000 | -0.175672000 |
| Cl | 4.419748000  | 1.951292000  | -0.011749000 |
| Cl | -4.964906000 | -1.282965000 | 0.077000000  |
| Cl | -4.119137000 | 1.748090000  | -0.868335000 |
| O  | -1.906219000 | 1.591448000  | 1.606392000  |
| H  | -3.138367000 | 1.107996000  | 1.308038000  |

IM5-d:

|   |              |              |              |
|---|--------------|--------------|--------------|
| C | -3.100448000 | 0.662279000  | -0.076247000 |
| C | -1.796540000 | 1.112746000  | -0.246737000 |
| C | -0.754728000 | 0.184696000  | -0.185294000 |
| C | -1.062978000 | -1.167813000 | 0.043666000  |
| C | -2.346791000 | -1.641576000 | 0.219556000  |
| C | -3.375683000 | -0.702071000 | 0.156302000  |
| H | -1.610336000 | 2.161742000  | -0.433565000 |
| H | -2.555581000 | -2.687379000 | 0.397806000  |
| C | 1.112550000  | -1.070190000 | -0.140704000 |
| C | 0.676944000  | 0.229674000  | -0.279525000 |
| C | 2.474402000  | -1.501918000 | -0.164735000 |
| C | 1.677941000  | 1.285338000  | -0.649596000 |
| C | 3.422861000  | -0.544510000 | -0.191771000 |
| H | 2.715267000  | -2.556473000 | -0.162478000 |
| C | 3.098649000  | 0.921364000  | -0.142998000 |
| H | 1.411294000  | 2.280976000  | -0.270046000 |

|    |              |              |              |
|----|--------------|--------------|--------------|
| O  | 0.082408000  | -1.934001000 | 0.069818000  |
| Cl | -5.012233000 | -1.264584000 | 0.372833000  |
| Cl | -4.396513000 | 1.831650000  | -0.157817000 |
| Cl | 5.109414000  | -0.964376000 | -0.237290000 |
| Cl | 3.289174000  | 1.503835000  | 1.591688000  |
| O  | 1.571441000  | 1.169888000  | -2.013296000 |
| H  | 3.824174000  | 1.494996000  | -0.715440000 |

TS5-d-1: :

|    |              |              |              |
|----|--------------|--------------|--------------|
| C  | -3.264377000 | 0.667489000  | -0.078387000 |
| C  | -1.981182000 | 1.177714000  | -0.220005000 |
| C  | -0.901138000 | 0.291201000  | -0.183422000 |
| C  | -1.148379000 | -1.087915000 | -0.001931000 |
| C  | -2.417473000 | -1.610904000 | 0.159060000  |
| C  | -3.482971000 | -0.714908000 | 0.113559000  |
| H  | -1.833993000 | 2.239528000  | -0.363264000 |
| H  | -2.583895000 | -2.668494000 | 0.313168000  |
| C  | 1.039378000  | -0.890028000 | -0.181875000 |
| C  | 0.518368000  | 0.362224000  | -0.233923000 |
| C  | 2.380391000  | -1.385556000 | -0.265311000 |
| C  | 2.333412000  | 1.693148000  | -0.743915000 |
| C  | 3.456078000  | -0.582044000 | -0.210876000 |
| H  | 2.505876000  | -2.456117000 | -0.367584000 |
| C  | 3.429310000  | 0.900259000  | 0.002886000  |
| H  | 1.841386000  | 2.473041000  | -0.135834000 |
| O  | 0.015810000  | -1.808275000 | 0.008559000  |
| Cl | -5.096473000 | -1.350420000 | 0.302947000  |
| Cl | -4.609271000 | 1.782314000  | -0.137603000 |
| Cl | 5.055731000  | -1.281178000 | -0.336635000 |
| Cl | 3.352006000  | 1.292942000  | 1.789618000  |
| O  | 2.233566000  | 1.635256000  | -1.953571000 |
| H  | 4.373245000  | 1.329924000  | -0.333116000 |

P5-d-1:

|   |             |              |              |
|---|-------------|--------------|--------------|
| C | 3.332179000 | 0.687270000  | -0.040346000 |
| C | 2.056438000 | 1.230851000  | -0.085618000 |
| C | 0.960975000 | 0.362011000  | -0.104875000 |
| C | 1.184003000 | -1.031955000 | -0.078435000 |
| C | 2.448929000 | -1.590044000 | -0.028146000 |
| C | 3.528992000 | -0.712123000 | -0.010574000 |
| H | 1.924855000 | 2.304146000  | -0.106434000 |
| H | 2.599522000 | -2.660844000 | -0.002819000 |

|    |              |              |              |
|----|--------------|--------------|--------------|
| C  | -1.014448000 | -0.772971000 | -0.151651000 |
| C  | -0.455432000 | 0.463120000  | -0.135547000 |
| C  | -2.345084000 | -1.305958000 | -0.217407000 |
| C  | -2.921774000 | 1.330677000  | 1.490102000  |
| C  | -3.485333000 | -0.606775000 | -0.095418000 |
| H  | -2.404314000 | -2.373771000 | -0.390435000 |
| C  | -3.613192000 | 0.856124000  | 0.194411000  |
| H  | -2.545724000 | 2.370361000  | 1.453977000  |
| O  | 0.009725000  | -1.724845000 | -0.105029000 |
| Cl | 5.135914000  | -1.390327000 | 0.050235000  |
| Cl | 4.697561000  | 1.779363000  | -0.019109000 |
| Cl | -5.015140000 | -1.449136000 | -0.277074000 |
| Cl | -3.055937000 | 1.904271000  | -1.204806000 |
| O  | -2.875455000 | 0.654192000  | 2.477392000  |
| H  | -4.666761000 | 1.113050000  | 0.310635000  |

TS5-d-2 :

|    |              |              |              |
|----|--------------|--------------|--------------|
| C  | -3.121946000 | 0.639137000  | -0.102278000 |
| C  | -1.830191000 | 1.116032000  | -0.275745000 |
| C  | -0.766569000 | 0.207598000  | -0.217009000 |
| C  | -1.045582000 | -1.154261000 | 0.007530000  |
| C  | -2.323252000 | -1.652717000 | 0.179169000  |
| C  | -3.368740000 | -0.733936000 | 0.124541000  |
| H  | -1.667254000 | 2.170397000  | -0.455243000 |
| H  | -2.512544000 | -2.704155000 | 0.345968000  |
| C  | 1.125588000  | -0.988200000 | -0.195879000 |
| C  | 0.660079000  | 0.286806000  | -0.352087000 |
| C  | 2.482686000  | -1.443632000 | -0.250173000 |
| C  | 1.531618000  | 1.463359000  | -0.699182000 |
| C  | 3.473290000  | -0.536929000 | -0.169950000 |
| H  | 2.686511000  | -2.494694000 | -0.410193000 |
| C  | 3.256185000  | 0.886379000  | 0.128279000  |
| H  | 1.447251000  | 2.326403000  | -0.018590000 |
| O  | 0.107238000  | -1.887141000 | 0.018828000  |
| Cl | -4.994545000 | -1.328589000 | 0.341427000  |
| Cl | -4.443782000 | 1.781470000  | -0.172960000 |
| Cl | 5.143936000  | -0.993704000 | -0.442296000 |
| Cl | 3.119178000  | 1.262464000  | 1.854853000  |
| O  | 1.850164000  | 1.675564000  | -1.900173000 |
| H  | 3.926462000  | 1.588934000  | -0.351901000 |

P5-d-2:



|    |              |              |              |
|----|--------------|--------------|--------------|
| C  | -3.248200000 | 0.584042000  | -0.189008000 |
| C  | -2.000769000 | 1.151596000  | -0.404647000 |
| C  | -0.860409000 | 0.347541000  | -0.265335000 |
| C  | -1.026505000 | -1.004786000 | 0.077141000  |
| C  | -2.257147000 | -1.595564000 | 0.294536000  |
| C  | -3.378831000 | -0.780646000 | 0.158580000  |
| H  | -1.934211000 | 2.198126000  | -0.669205000 |
| H  | -2.353417000 | -2.640057000 | 0.556363000  |
| C  | 1.164679000  | -0.688176000 | -0.114506000 |
| C  | 0.554825000  | 0.553081000  | -0.412063000 |
| C  | 2.453282000  | -1.210165000 | -0.088565000 |
| C  | 1.148411000  | 1.763612000  | -0.967409000 |
| C  | 3.708143000  | -0.537972000 | -0.009290000 |
| H  | 2.500469000  | -2.293604000 | -0.133584000 |
| C  | 4.091216000  | 0.536974000  | 0.711591000  |
| H  | 0.426515000  | 2.592435000  | -1.106201000 |
| O  | 0.175325000  | -1.630711000 | 0.156657000  |
| Cl | -4.946913000 | -1.490882000 | 0.426916000  |
| Cl | -4.661178000 | 1.598129000  | -0.356847000 |
| Cl | 5.016428000  | -1.347618000 | -0.897183000 |
| Cl | 3.079904000  | 1.377843000  | 1.833691000  |
| O  | 2.307919000  | 1.902692000  | -1.304799000 |
| H  | 5.102443000  | 0.913023000  | 0.679781000  |

RC6:

|   |              |              |              |
|---|--------------|--------------|--------------|
| C | 3.123953000  | 0.709100000  | -0.160365000 |
| C | 1.787724000  | 1.086993000  | -0.218447000 |
| C | 0.807079000  | 0.099453000  | -0.129032000 |
| C | 1.196781000  | -1.240982000 | 0.025695000  |
| C | 2.517166000  | -1.643637000 | 0.087588000  |
| C | 3.485858000  | -0.645987000 | -0.010097000 |
| H | 1.530311000  | 2.132506000  | -0.322708000 |
| H | 2.795546000  | -2.681431000 | 0.207417000  |
| C | -0.993054000 | -1.270462000 | 0.003381000  |
| C | -0.636676000 | 0.077347000  | -0.147373000 |
| C | -2.302722000 | -1.709280000 | 0.037402000  |
| C | -1.646143000 | 1.040551000  | -0.264857000 |
| C | -3.303633000 | -0.742936000 | -0.091504000 |
| H | -2.552556000 | -2.754318000 | 0.159247000  |
| C | -2.980643000 | 0.614993000  | -0.252024000 |
| H | -1.419681000 | 2.081150000  | -0.444182000 |
| O | 0.111010000  | -2.079305000 | 0.109011000  |

|    |              |              |              |
|----|--------------|--------------|--------------|
| Cl | 5.161892000  | -1.123406000 | 0.062140000  |
| Cl | 4.344920000  | 1.954604000  | -0.276568000 |
| Cl | -4.964574000 | -1.276005000 | -0.056158000 |
| Cl | -4.229994000 | 1.819367000  | -0.447848000 |
| O  | -1.328613000 | 1.813344000  | 2.019244000  |
| H  | -2.255087000 | 1.731361000  | 2.305372000  |

TS6:

|    |              |              |              |
|----|--------------|--------------|--------------|
| C  | 3.080914000  | 0.756950000  | -0.092612000 |
| C  | 1.750271000  | 1.152894000  | 0.042775000  |
| C  | 0.768157000  | 0.175936000  | 0.095880000  |
| C  | 1.131983000  | -1.170568000 | 0.030890000  |
| C  | 2.438031000  | -1.596713000 | -0.088964000 |
| C  | 3.420463000  | -0.605679000 | -0.153830000 |
| H  | 1.510565000  | 2.205323000  | 0.114795000  |
| H  | 2.699582000  | -2.644742000 | -0.133408000 |
| C  | -1.060764000 | -1.195353000 | 0.139047000  |
| C  | -0.685838000 | 0.183688000  | 0.304148000  |
| C  | -2.361045000 | -1.610122000 | -0.024968000 |
| C  | -1.685110000 | 1.164071000  | 0.023294000  |
| C  | -3.339515000 | -0.616128000 | -0.142544000 |
| H  | -2.620556000 | -2.656628000 | -0.105276000 |
| C  | -2.992166000 | 0.762386000  | -0.145803000 |
| H  | -1.431458000 | 2.215118000  | 0.010676000  |
| O  | 0.030874000  | -2.007888000 | 0.087195000  |
| Cl | 5.081521000  | -1.112284000 | -0.318799000 |
| Cl | 4.309793000  | 1.996547000  | -0.176199000 |
| Cl | -4.990744000 | -1.117823000 | -0.338278000 |
| Cl | -4.219747000 | 1.984407000  | -0.384246000 |
| O  | -0.593627000 | 0.313405000  | 2.212622000  |
| H  | -1.522403000 | 0.264208000  | 2.488682000  |

IM6:

|   |              |              |              |
|---|--------------|--------------|--------------|
| C | 3.050865000  | 0.745349000  | -0.034696000 |
| C | 1.735742000  | 1.122328000  | 0.254563000  |
| C | 0.763358000  | 0.142831000  | 0.330336000  |
| C | 1.111144000  | -1.191343000 | 0.140602000  |
| C | 2.399246000  | -1.602508000 | -0.129865000 |
| C | 3.376762000  | -0.605921000 | -0.219900000 |
| H | 1.506132000  | 2.166776000  | 0.421142000  |
| H | 2.651784000  | -2.643843000 | -0.273817000 |
| C | -1.080679000 | -1.240763000 | 0.348679000  |

|    |              |              |              |
|----|--------------|--------------|--------------|
| C  | -0.693189000 | 0.166098000  | 0.733422000  |
| C  | -2.348510000 | -1.621130000 | 0.037239000  |
| C  | -1.655250000 | 1.160684000  | 0.168373000  |
| C  | -3.315061000 | -0.604621000 | -0.137373000 |
| H  | -2.601408000 | -2.654971000 | -0.158141000 |
| C  | -2.924543000 | 0.775521000  | -0.144204000 |
| H  | -1.372092000 | 2.204565000  | 0.140794000  |
| O  | 0.021420000  | -2.044076000 | 0.233419000  |
| Cl | 5.012336000  | -1.097745000 | -0.576139000 |
| Cl | 4.266877000  | 1.995210000  | -0.149741000 |
| Cl | -4.952930000 | -1.076570000 | -0.448586000 |
| Cl | -4.092222000 | 2.001625000  | -0.598846000 |
| O  | -0.660155000 | 0.311598000  | 2.194244000  |
| H  | -1.572909000 | 0.325299000  | 2.511985000  |

TS6-a:

|    |              |              |              |
|----|--------------|--------------|--------------|
| C  | 2.912368000  | 0.675282000  | -0.245954000 |
| C  | 1.663838000  | 1.140764000  | 0.149789000  |
| C  | 0.660209000  | 0.268254000  | 0.585738000  |
| C  | 0.981843000  | -1.094560000 | 0.627168000  |
| C  | 2.222742000  | -1.584262000 | 0.257938000  |
| C  | 3.198597000  | -0.694499000 | -0.178028000 |
| H  | 1.470959000  | 2.204991000  | 0.128004000  |
| H  | 2.416011000  | -2.647767000 | 0.289900000  |
| C  | -1.167996000 | -1.465332000 | 0.716118000  |
| C  | -0.570167000 | 0.876322000  | 1.192911000  |
| C  | -2.413150000 | -1.798461000 | 0.406722000  |
| C  | -1.837052000 | 1.203172000  | 0.757595000  |
| C  | -3.184218000 | -0.720602000 | -0.168163000 |
| H  | -2.853215000 | -2.787395000 | 0.509309000  |
| C  | -2.841017000 | 0.606161000  | -0.079353000 |
| H  | -2.219733000 | 2.107370000  | 1.237910000  |
| O  | 0.000498000  | -2.011658000 | 1.001061000  |
| Cl | 4.751346000  | -1.326545000 | -0.651080000 |
| Cl | 4.097581000  | 1.826167000  | -0.810646000 |
| Cl | -4.639836000 | -1.225434000 | -0.994955000 |
| Cl | -3.894436000 | 1.817913000  | -0.820089000 |
| O  | -0.130626000 | 1.528914000  | 2.327664000  |
| H  | -0.878116000 | 1.945594000  | 2.775273000  |

IM6-a:

|   |             |             |              |
|---|-------------|-------------|--------------|
| C | 2.918414000 | 0.636160000 | -0.256177000 |
|---|-------------|-------------|--------------|

|    |              |              |              |
|----|--------------|--------------|--------------|
| C  | 1.689114000  | 1.147847000  | 0.136908000  |
| C  | 0.649501000  | 0.328775000  | 0.602459000  |
| C  | 0.926397000  | -1.045579000 | 0.662534000  |
| C  | 2.151798000  | -1.578817000 | 0.298275000  |
| C  | 3.159866000  | -0.739491000 | -0.159034000 |
| H  | 1.535394000  | 2.217437000  | 0.096921000  |
| H  | 2.304588000  | -2.647946000 | 0.354512000  |
| C  | -1.222581000 | -1.545480000 | 0.643948000  |
| C  | -0.537624000 | 1.047998000  | 1.171272000  |
| C  | -2.508994000 | -1.815861000 | 0.555937000  |
| C  | -1.852049000 | 1.181095000  | 0.851230000  |
| C  | -3.234206000 | -0.733621000 | -0.094979000 |
| H  | -3.023174000 | -2.706589000 | 0.907758000  |
| C  | -2.830379000 | 0.564980000  | -0.040244000 |
| H  | -2.319485000 | 2.015114000  | 1.382914000  |
| O  | -0.051605000 | -1.965061000 | 1.063030000  |
| Cl | 4.687364000  | -1.436868000 | -0.618813000 |
| Cl | 4.138351000  | 1.735718000  | -0.846323000 |
| Cl | -4.663644000 | -1.219848000 | -0.981375000 |
| Cl | -3.744581000 | 1.794902000  | -0.927287000 |
| O  | -0.036427000 | 1.861825000  | 2.167472000  |
| H  | -0.745945000 | 2.403464000  | 2.535659000  |

TS6-a-1 :

|    |              |              |              |
|----|--------------|--------------|--------------|
| C  | 2.669603000  | 0.484396000  | -0.209555000 |
| C  | 1.610590000  | 1.284697000  | 0.211263000  |
| C  | 0.477748000  | 0.722110000  | 0.816774000  |
| C  | 0.506793000  | -0.645208000 | 0.972952000  |
| C  | 1.522955000  | -1.485378000 | 0.607591000  |
| C  | 2.630438000  | -0.904519000 | -0.018416000 |
| H  | 1.663102000  | 2.355794000  | 0.061824000  |
| H  | 1.487632000  | -2.550652000 | 0.796719000  |
| C  | -1.910969000 | -1.514172000 | 1.821883000  |
| C  | -0.647282000 | 1.575915000  | 1.271361000  |
| C  | -3.012625000 | -1.324350000 | 1.117260000  |
| C  | -1.912715000 | 1.493642000  | 0.834279000  |
| C  | -2.969437000 | -0.556835000 | -0.134549000 |
| H  | -3.934924000 | -1.809951000 | 1.411610000  |
| C  | -2.401403000 | 0.653624000  | -0.272288000 |
| H  | -2.641742000 | 2.193750000  | 1.242996000  |
| O  | -0.734882000 | -1.448442000 | 2.105588000  |
| Cl | 3.941839000  | -1.933357000 | -0.526770000 |
| Cl | 4.039410000  | 1.251882000  | -0.971081000 |

|    |              |              |              |
|----|--------------|--------------|--------------|
| Cl | -3.731573000 | -1.376672000 | -1.494568000 |
| Cl | -2.328753000 | 1.447016000  | -1.851813000 |
| O  | -0.223310000 | 2.498157000  | 2.184773000  |
| H  | -0.946396000 | 3.099021000  | 2.404562000  |

P6-a-1:

|    |              |              |              |
|----|--------------|--------------|--------------|
| C  | 2.882985000  | 0.348016000  | -0.086296000 |
| C  | 1.854993000  | 1.233555000  | -0.400015000 |
| C  | 0.527826000  | 0.782216000  | -0.488332000 |
| C  | 0.322961000  | -0.564821000 | -0.249946000 |
| C  | 1.291879000  | -1.476976000 | 0.061487000  |
| C  | 2.611991000  | -1.007223000 | 0.145185000  |
| H  | 2.083676000  | 2.276266000  | -0.575455000 |
| H  | 1.077143000  | -2.524082000 | 0.237467000  |
| C  | -2.346151000 | 1.567362000  | 1.913536000  |
| C  | -0.576793000 | 1.690545000  | -0.823561000 |
| C  | -2.706015000 | 0.299744000  | 1.774980000  |
| C  | -1.876764000 | 1.325765000  | -0.898732000 |
| C  | -2.765553000 | -0.468791000 | 0.541715000  |
| H  | -2.993353000 | -0.180322000 | 2.703406000  |
| C  | -2.369669000 | -0.035934000 | -0.676105000 |
| H  | -2.609105000 | 2.071513000  | -1.207824000 |
| O  | -2.058724000 | 2.662403000  | 2.162676000  |
| Cl | 3.881111000  | -2.137443000 | 0.536632000  |
| Cl | 4.513384000  | 0.971692000  | 0.009954000  |
| Cl | -3.410573000 | -2.079508000 | 0.772279000  |
| Cl | -2.630289000 | -1.010462000 | -2.124257000 |
| O  | -0.161846000 | 2.964333000  | -1.049455000 |
| H  | -0.915711000 | 3.529258000  | -1.255206000 |

TS6-b:

|   |              |              |              |
|---|--------------|--------------|--------------|
| C | 3.277285000  | 0.647202000  | 0.159755000  |
| C | 2.041654000  | 1.100430000  | 0.606014000  |
| C | 0.953873000  | 0.231559000  | 0.535520000  |
| C | 1.129826000  | -1.065576000 | 0.046446000  |
| C | 2.347774000  | -1.543485000 | -0.400796000 |
| C | 3.427506000  | -0.663738000 | -0.342762000 |
| H | 1.936684000  | 2.103844000  | 0.996139000  |
| H | 2.467272000  | -2.550176000 | -0.776626000 |
| C | -1.001480000 | -0.927766000 | 0.608638000  |
| C | -0.442629000 | 0.331477000  | 0.903412000  |
| C | -2.353208000 | -1.356605000 | 0.628140000  |

|    |              |              |              |
|----|--------------|--------------|--------------|
| C  | -1.938594000 | 1.331917000  | -0.509219000 |
| C  | -3.361711000 | -0.539942000 | 0.205400000  |
| H  | -2.575331000 | -2.380509000 | 0.904948000  |
| C  | -3.118224000 | 0.733356000  | -0.480937000 |
| H  | -1.596896000 | 2.238691000  | -0.984995000 |
| O  | -0.039328000 | -1.772362000 | 0.083565000  |
| Cl | 4.977063000  | -1.234076000 | -0.904881000 |
| Cl | 4.641291000  | 1.737472000  | 0.237907000  |
| Cl | -5.001506000 | -1.113198000 | 0.378721000  |
| Cl | -4.468896000 | 1.426699000  | -1.433948000 |
| O  | -0.804771000 | 1.237579000  | 1.851145000  |
| H  | -1.766542000 | 1.306203000  | 1.902578000  |

IM6-b:

|    |              |              |              |
|----|--------------|--------------|--------------|
| C  | -3.478100000 | 0.714731000  | -0.031014000 |
| C  | -2.208838000 | 1.272028000  | 0.005333000  |
| C  | -1.108885000 | 0.409048000  | 0.030930000  |
| C  | -1.308214000 | -0.976909000 | 0.018751000  |
| C  | -2.566921000 | -1.555084000 | -0.016410000 |
| C  | -3.655720000 | -0.689188000 | -0.041782000 |
| H  | -2.082733000 | 2.346261000  | 0.013434000  |
| H  | -2.705679000 | -2.627311000 | -0.024815000 |
| C  | 0.887075000  | -0.665639000 | 0.077959000  |
| C  | 0.311737000  | 0.590189000  | 0.067968000  |
| C  | 2.197533000  | -1.239520000 | 0.058865000  |
| C  | 3.499426000  | 1.331741000  | 1.530527000  |
| C  | 3.434994000  | -0.702210000 | 0.149907000  |
| H  | 2.164984000  | -2.315512000 | -0.080053000 |
| C  | 3.815159000  | 0.682166000  | 0.441667000  |
| H  | 3.665834000  | 2.271705000  | 2.029952000  |
| O  | -0.125908000 | -1.636355000 | 0.047769000  |
| Cl | -5.255402000 | -1.386846000 | -0.088518000 |
| Cl | -4.858754000 | 1.788279000  | -0.061919000 |
| Cl | 4.815931000  | -1.781164000 | -0.046242000 |
| Cl | 4.842052000  | 1.507240000  | -0.795664000 |
| O  | 0.873209000  | 1.809061000  | 0.064756000  |
| H  | 1.818659000  | 1.747433000  | 0.274900000  |

TS6-b-1: :

|   |              |             |              |
|---|--------------|-------------|--------------|
| C | -3.557857000 | 0.710880000 | -0.030719000 |
| C | -2.303675000 | 1.299708000 | 0.001718000  |
| C | -1.181973000 | 0.464463000 | 0.024349000  |

|    |              |              |              |
|----|--------------|--------------|--------------|
| C  | -1.343367000 | -0.925533000 | 0.011158000  |
| C  | -2.586469000 | -1.536389000 | -0.024659000 |
| C  | -3.697291000 | -0.698458000 | -0.044896000 |
| H  | -2.202635000 | 2.376673000  | 0.010036000  |
| H  | -2.697752000 | -2.611740000 | -0.035570000 |
| C  | 0.848290000  | -0.562566000 | 0.060798000  |
| C  | 0.233346000  | 0.690659000  | 0.046132000  |
| C  | 2.151382000  | -1.114434000 | 0.115210000  |
| C  | 3.297450000  | 1.671773000  | 1.005824000  |
| C  | 3.427920000  | -0.618124000 | 0.130943000  |
| H  | 2.104405000  | -2.198775000 | 0.107989000  |
| C  | 3.898481000  | 0.748746000  | 0.269299000  |
| H  | 3.670881000  | 2.612555000  | 1.388598000  |
| O  | -0.145840000 | -1.555836000 | 0.039710000  |
| Cl | -5.276713000 | -1.436892000 | -0.089914000 |
| Cl | -4.966363000 | 1.746116000  | -0.054927000 |
| Cl | 4.701673000  | -1.838694000 | 0.075141000  |
| Cl | 5.381522000  | 1.202736000  | -0.627970000 |
| O  | 0.771166000  | 1.897274000  | 0.037447000  |
| H  | 1.723055000  | 1.859903000  | 0.381140000  |

P6-b-1:

|    |              |              |              |
|----|--------------|--------------|--------------|
| C  | -3.452622000 | 0.726799000  | -0.086379000 |
| C  | -2.170402000 | 1.265017000  | -0.138023000 |
| C  | -1.085755000 | 0.397212000  | -0.075082000 |
| C  | -1.295655000 | -0.971896000 | 0.030137000  |
| C  | -2.551965000 | -1.542475000 | 0.084404000  |
| C  | -3.638694000 | -0.666990000 | 0.024580000  |
| H  | -2.024339000 | 2.334168000  | -0.224913000 |
| H  | -2.699778000 | -2.610413000 | 0.166968000  |
| C  | 0.921130000  | -0.758791000 | 0.015941000  |
| C  | 0.373721000  | 0.611077000  | -0.109166000 |
| C  | 2.205838000  | -1.318294000 | -0.047044000 |
| C  | 3.313687000  | 1.069604000  | 1.760458000  |
| C  | 3.427827000  | -0.705367000 | 0.062207000  |
| H  | 2.212771000  | -2.389091000 | -0.227482000 |
| C  | 3.712175000  | 0.638051000  | 0.566233000  |
| H  | 3.533118000  | 2.072097000  | 2.101785000  |
| O  | -0.110159000 | -1.670643000 | 0.072985000  |
| Cl | -5.239241000 | -1.352542000 | 0.089939000  |
| Cl | -4.820031000 | 1.811123000  | -0.162220000 |
| Cl | 4.835144000  | -1.669344000 | -0.344296000 |
| Cl | 4.672913000  | 1.670819000  | -0.486158000 |

|   |             |             |              |
|---|-------------|-------------|--------------|
| O | 0.990844000 | 1.657305000 | -0.249380000 |
| H | 2.747691000 | 0.415307000 | 2.411701000  |

TS6-c:

|    |              |              |              |
|----|--------------|--------------|--------------|
| C  | 3.006249000  | 0.752517000  | 0.008316000  |
| C  | 1.713555000  | 1.106431000  | 0.408147000  |
| C  | 0.742090000  | 0.124645000  | 0.483856000  |
| C  | 1.064208000  | -1.191962000 | 0.157364000  |
| C  | 2.334096000  | -1.578085000 | -0.226044000 |
| C  | 3.310354000  | -0.580402000 | -0.302352000 |
| H  | 1.502021000  | 2.137629000  | 0.660814000  |
| H  | 2.569713000  | -2.604816000 | -0.469655000 |
| C  | -1.107844000 | -1.306096000 | 0.689568000  |
| C  | -0.693626000 | 0.135534000  | 0.934332000  |
| C  | -2.411168000 | -1.598883000 | 0.122107000  |
| C  | -1.621051000 | 1.175370000  | 0.412614000  |
| C  | -3.244187000 | -0.577782000 | -0.180362000 |
| H  | -2.713246000 | -2.629937000 | -0.005365000 |
| C  | -2.828569000 | 0.829195000  | -0.063681000 |
| H  | -1.318043000 | 2.214569000  | 0.433295000  |
| O  | -0.005658000 | -2.055197000 | 0.249421000  |
| Cl | 4.915861000  | -1.045540000 | -0.801861000 |
| Cl | 4.220321000  | 2.005195000  | -0.082082000 |
| Cl | -4.846768000 | -0.946394000 | -0.756251000 |
| Cl | -3.924599000 | 2.078073000  | -0.610265000 |
| O  | -0.826124000 | -0.077636000 | 2.374825000  |
| H  | -1.172674000 | -1.350335000 | 1.981564000  |

IM6-c:

|   |              |              |              |
|---|--------------|--------------|--------------|
| C | 2.958943000  | 0.669189000  | 0.060832000  |
| C | 1.732120000  | 1.037588000  | 0.608344000  |
| C | 0.724076000  | 0.088282000  | 0.675731000  |
| C | 0.930999000  | -1.217951000 | 0.235409000  |
| C | 2.145836000  | -1.605375000 | -0.311552000 |
| C | 3.157024000  | -0.647036000 | -0.394728000 |
| H | 1.583868000  | 2.044591000  | 0.975455000  |
| H | 2.308849000  | -2.614736000 | -0.663224000 |
| C | -1.173158000 | -1.293601000 | 1.114811000  |
| C | -0.710362000 | 0.206143000  | 1.200088000  |
| C | -2.509266000 | -1.541276000 | 0.504814000  |
| C | -1.555588000 | 1.176980000  | 0.417031000  |



|    |              |              |              |
|----|--------------|--------------|--------------|
| C  | -3.213628000 | -0.566493000 | -0.081225000 |
| H  | -2.916361000 | -2.541960000 | 0.576418000  |
| C  | -2.707494000 | 0.818255000  | -0.160204000 |
| H  | -1.196887000 | 2.196512000  | 0.359142000  |
| O  | -0.146508000 | -2.022409000 | 0.353278000  |
| Cl | 4.682974000  | -1.132368000 | -1.081442000 |
| Cl | 4.226686000  | 1.866465000  | -0.038388000 |
| Cl | -4.789784000 | -0.925738000 | -0.742913000 |
| Cl | -3.634689000 | 2.010144000  | -1.041951000 |
| O  | -0.549382000 | 0.640891000  | 2.494749000  |
| H  | -1.137559000 | -1.695049000 | 2.131678000  |

TS6-c-1 :

|    |              |              |              |
|----|--------------|--------------|--------------|
| C  | -3.087258000 | 0.582046000  | -0.155784000 |
| C  | -1.901088000 | 1.104846000  | -0.672586000 |
| C  | -0.752120000 | 0.327143000  | -0.649422000 |
| C  | -0.811465000 | -0.968253000 | -0.145096000 |
| C  | -1.970147000 | -1.515663000 | 0.375531000  |
| C  | -3.116213000 | -0.718944000 | 0.373942000  |
| H  | -1.884930000 | 2.107112000  | -1.081287000 |
| H  | -1.996849000 | -2.527400000 | 0.756317000  |
| C  | 1.151821000  | -1.107053000 | -1.249420000 |
| C  | 0.642974000  | 0.746776000  | -1.093792000 |
| C  | 2.592274000  | -1.250184000 | -1.087737000 |
| C  | 1.486328000  | 1.187251000  | 0.099073000  |
| C  | 3.267088000  | -0.488930000 | -0.207790000 |
| H  | 3.128832000  | -1.913216000 | -1.756723000 |
| C  | 2.629766000  | 0.624491000  | 0.509599000  |
| H  | 1.099039000  | 2.049090000  | 0.632823000  |
| O  | 0.381874000  | -1.642463000 | -0.210537000 |
| Cl | -4.584901000 | -1.393201000 | 1.027004000  |
| Cl | -4.519098000 | 1.579924000  | -0.179084000 |
| Cl | 4.986831000  | -0.708045000 | -0.039405000 |
| Cl | 3.449287000  | 1.279044000  | 1.917713000  |
| O  | 0.802776000  | 1.342516000  | -2.195232000 |
| H  | 0.738935000  | -1.338450000 | -2.229973000 |

P6-c-1:

|   |              |              |              |
|---|--------------|--------------|--------------|
| C | -3.139558000 | 0.634213000  | -0.129593000 |
| C | -1.925381000 | 1.267309000  | -0.378272000 |
| C | -0.721060000 | 0.576052000  | -0.247748000 |
| C | -0.758080000 | -0.783178000 | 0.086009000  |

|    |              |              |              |
|----|--------------|--------------|--------------|
| C  | -1.958067000 | -1.429287000 | 0.335903000  |
| C  | -3.153430000 | -0.716586000 | 0.241934000  |
| H  | -1.910092000 | 2.313385000  | -0.657119000 |
| H  | -1.963222000 | -2.480415000 | 0.591866000  |
| C  | 1.075016000  | -1.651758000 | -1.047103000 |
| C  | 0.579571000  | 1.311012000  | -0.406930000 |
| C  | 2.341756000  | -1.210052000 | -1.288581000 |
| C  | 1.593457000  | 1.099171000  | 0.686794000  |
| C  | 3.178339000  | -0.411523000 | -0.480987000 |
| H  | 2.764161000  | -1.542776000 | -2.230613000 |
| C  | 2.752080000  | 0.419844000  | 0.617223000  |
| H  | 1.336078000  | 1.600959000  | 1.615117000  |
| O  | 0.426185000  | -1.498017000 | 0.157298000  |
| Cl | -4.644955000 | -1.550889000 | 0.575133000  |
| Cl | -4.615092000 | 1.552090000  | -0.280323000 |
| Cl | 4.868706000  | -0.379948000 | -0.919567000 |
| Cl | 3.844232000  | 0.529627000  | 2.007103000  |
| O  | 0.744826000  | 2.137138000  | -1.276163000 |
| H  | 0.517979000  | -2.200398000 | -1.800100000 |

TS6-c-2 :

|    |              |              |              |
|----|--------------|--------------|--------------|
| C  | 3.039913000  | 0.478285000  | 0.359362000  |
| C  | 1.905993000  | 0.704725000  | 1.132177000  |
| C  | 0.792123000  | -0.100912000 | 0.931356000  |
| C  | 0.808721000  | -1.117461000 | -0.022171000 |
| C  | 1.927363000  | -1.364230000 | -0.804957000 |
| C  | 3.041496000  | -0.549275000 | -0.606885000 |
| H  | 1.898755000  | 1.487473000  | 1.880569000  |
| H  | 1.940858000  | -2.154249000 | -1.543124000 |
| C  | -1.185263000 | -1.430850000 | 1.032301000  |
| C  | -0.542035000 | -0.122154000 | 1.585829000  |
| C  | -2.634882000 | -1.422136000 | 0.669020000  |
| C  | -1.445405000 | 1.265325000  | 0.240979000  |
| C  | -3.244614000 | -0.403265000 | 0.053725000  |
| H  | -3.218572000 | -2.294008000 | 0.934154000  |
| C  | -2.561249000 | 0.851799000  | -0.312420000 |
| H  | -0.816396000 | 2.136292000  | 0.179866000  |
| O  | -0.351195000 | -1.819848000 | -0.103743000 |
| Cl | 4.451004000  | -0.845269000 | -1.587751000 |
| Cl | 4.448514000  | 1.479488000  | 0.616552000  |
| Cl | -4.952032000 | -0.519863000 | -0.299952000 |
| Cl | -3.255443000 | 1.844518000  | -1.611053000 |

|   |              |              |             |
|---|--------------|--------------|-------------|
| O | -0.894316000 | 0.440834000  | 2.626839000 |
| H | -1.018255000 | -2.183344000 | 1.811317000 |

P6-c-2:

|    |              |              |              |
|----|--------------|--------------|--------------|
| C  | -3.046519000 | 0.486409000  | 0.308484000  |
| C  | -2.121480000 | 1.519808000  | 0.322746000  |
| C  | -0.886814000 | 1.318065000  | -0.291207000 |
| C  | -0.583446000 | 0.102482000  | -0.902961000 |
| C  | -1.492967000 | -0.946532000 | -0.933702000 |
| C  | -2.725864000 | -0.739183000 | -0.319780000 |
| H  | -2.355042000 | 2.463777000  | 0.798765000  |
| H  | -1.258224000 | -1.888571000 | -1.409634000 |
| C  | 1.298830000  | 1.323331000  | -1.247758000 |
| C  | 0.277054000  | 2.193647000  | -0.449563000 |
| C  | 2.647315000  | 1.227649000  | -0.599912000 |
| C  | 1.481296000  | -0.927066000 | 1.580341000  |
| C  | 3.119948000  | 0.249759000  | 0.173598000  |
| H  | 3.292193000  | 2.075078000  | -0.803355000 |
| C  | 2.397984000  | -0.940783000 | 0.658002000  |
| H  | 0.833684000  | -1.567492000 | 2.153135000  |
| O  | 0.656645000  | 0.046151000  | -1.447727000 |
| Cl | -3.876094000 | -2.046107000 | -0.346023000 |
| Cl | -4.598375000 | 0.729104000  | 1.072563000  |
| Cl | 4.786910000  | 0.345529000  | 0.745987000  |
| Cl | 2.920293000  | -2.504931000 | -0.058560000 |
| O  | 0.458499000  | 3.332455000  | -0.093559000 |
| H  | 1.417758000  | 1.781725000  | -2.235773000 |

TS6-c-3 :

|   |              |              |              |
|---|--------------|--------------|--------------|
| C | 2.684218000  | 0.877678000  | 0.028226000  |
| C | 1.427929000  | 1.111233000  | 0.607650000  |
| C | 0.611212000  | 0.024688000  | 0.746282000  |
| C | 0.932833000  | -1.274216000 | 0.425211000  |
| C | 2.182276000  | -1.504872000 | -0.144428000 |
| C | 3.048907000  | -0.426752000 | -0.336704000 |
| H | 1.145282000  | 2.108574000  | 0.919644000  |
| H | 2.477550000  | -2.505922000 | -0.431411000 |
| C | -1.269228000 | -1.742880000 | 0.937743000  |
| C | -1.186162000 | -0.443470000 | 1.784650000  |
| C | -2.020101000 | -1.593904000 | -0.354882000 |
| C | -2.071203000 | 0.672652000  | 1.385792000  |
| C | -2.752140000 | -0.514413000 | -0.651962000 |

|    |              |              |              |
|----|--------------|--------------|--------------|
| H  | -1.965856000 | -2.427820000 | -1.043956000 |
| C  | -2.817418000 | 0.633931000  | 0.267399000  |
| H  | -2.102535000 | 1.521335000  | 2.056863000  |
| O  | 0.047107000  | -2.272997000 | 0.674331000  |
| Cl | 4.607176000  | -0.752609000 | -1.052393000 |
| Cl | 3.760505000  | 2.232127000  | -0.206918000 |
| Cl | -3.624978000 | -0.444494000 | -2.164245000 |
| Cl | -3.874192000 | 1.965672000  | -0.108614000 |
| O  | -0.696408000 | -0.492667000 | 2.927246000  |
| H  | -1.751481000 | -2.500712000 | 1.563267000  |

P6-c-3:

|    |              |              |              |
|----|--------------|--------------|--------------|
| C  | 2.446747000  | -0.874069000 | -0.060391000 |
| C  | 1.111641000  | -1.045324000 | 0.321085000  |
| C  | 0.362724000  | 0.069467000  | 0.652066000  |
| C  | 0.938068000  | 1.337053000  | 0.607954000  |
| C  | 2.257271000  | 1.535094000  | 0.241107000  |
| C  | 3.011377000  | 0.407342000  | -0.093876000 |
| H  | 0.694797000  | -2.043372000 | 0.352716000  |
| H  | 2.691026000  | 2.524770000  | 0.205438000  |
| C  | -1.244733000 | 1.774693000  | 0.981247000  |
| C  | -1.974135000 | 2.175063000  | -0.319718000 |
| C  | -1.059849000 | 0.242609000  | 1.178742000  |
| C  | -2.859028000 | 1.195987000  | -0.920349000 |
| C  | -2.117385000 | -0.604579000 | 0.533680000  |
| H  | -1.063690000 | 0.016992000  | 2.251566000  |
| C  | -2.935238000 | -0.123022000 | -0.476235000 |
| H  | -3.465241000 | 1.527334000  | -1.753281000 |
| O  | 0.083831000  | 2.333256000  | 0.983392000  |
| Cl | 4.675023000  | 0.647051000  | -0.565249000 |
| Cl | 3.377423000  | -2.291990000 | -0.485658000 |
| Cl | -2.227150000 | -2.231708000 | 1.104383000  |
| Cl | -4.099519000 | -1.172373000 | -1.251695000 |
| O  | -1.837991000 | 3.295918000  | -0.779659000 |
| H  | -1.786574000 | 2.232356000  | 1.811528000  |

TS6-d:

|   |             |              |              |
|---|-------------|--------------|--------------|
| C | 3.092500000 | 0.738710000  | -0.059854000 |
| C | 1.774233000 | 1.131586000  | 0.184619000  |
| C | 0.793579000 | 0.159532000  | 0.282643000  |
| C | 1.143634000 | -1.183226000 | 0.172217000  |
| C | 2.435897000 | -1.609988000 | -0.053661000 |

|    |              |              |              |
|----|--------------|--------------|--------------|
| C  | 3.417653000  | -0.621657000 | -0.174129000 |
| H  | 1.545305000  | 2.183322000  | 0.300157000  |
| H  | 2.688098000  | -2.658005000 | -0.137571000 |
| C  | -1.051164000 | -1.224973000 | 0.385502000  |
| C  | -0.661018000 | 0.200925000  | 0.662610000  |
| C  | -2.301419000 | -1.620813000 | 0.091580000  |
| C  | -1.700391000 | 1.214636000  | 0.186274000  |
| C  | -3.313225000 | -0.614991000 | -0.118164000 |
| H  | -2.541891000 | -2.659319000 | -0.092577000 |
| C  | -3.011569000 | 0.722250000  | -0.169155000 |
| H  | -1.337475000 | 2.117835000  | -0.298842000 |
| O  | 0.054723000  | -2.031376000 | 0.305835000  |
| Cl | 5.058258000  | -1.133131000 | -0.471816000 |
| Cl | 4.315500000  | 1.977976000  | -0.208686000 |
| Cl | -4.924348000 | -1.194924000 | -0.423572000 |
| Cl | -4.208537000 | 1.930911000  | -0.555490000 |
| O  | -0.857380000 | 0.640564000  | 2.028432000  |
| H  | -1.739889000 | 1.516583000  | 1.424404000  |

IM6-d:

|    |              |              |              |
|----|--------------|--------------|--------------|
| C  | 3.104468000  | 0.748679000  | -0.006746000 |
| C  | 1.778714000  | 1.138736000  | 0.177004000  |
| C  | 0.795512000  | 0.161119000  | 0.188099000  |
| C  | 1.137816000  | -1.190604000 | 0.073786000  |
| C  | 2.443554000  | -1.605533000 | -0.094411000 |
| C  | 3.429538000  | -0.614425000 | -0.134899000 |
| H  | 1.538147000  | 2.185463000  | 0.308350000  |
| H  | 2.702257000  | -2.650344000 | -0.196131000 |
| C  | -1.070386000 | -1.226079000 | 0.156599000  |
| C  | -0.701317000 | 0.214280000  | 0.475729000  |
| C  | -2.323120000 | -1.615862000 | -0.073985000 |
| C  | -1.616978000 | 1.190930000  | -0.263833000 |
| C  | -3.362408000 | -0.583966000 | -0.120665000 |
| H  | -2.590035000 | -2.648142000 | -0.256790000 |
| C  | -3.055488000 | 0.723316000  | -0.210843000 |
| H  | -1.311321000 | 1.282771000  | -1.314775000 |
| O  | 0.053221000  | -2.028200000 | 0.106379000  |
| Cl | 5.079967000  | -1.120665000 | -0.354419000 |
| Cl | 4.337802000  | 1.982645000  | -0.061736000 |
| Cl | -5.008986000 | -1.165887000 | -0.116039000 |
| Cl | -4.259948000 | 1.970016000  | -0.369663000 |
| O  | -0.641241000 | 0.439170000  | 1.843308000  |
| H  | -1.524490000 | 2.175109000  | 0.198403000  |

TS6-d-1: :

|    |              |              |              |
|----|--------------|--------------|--------------|
| C  | 3.151010000  | 0.729614000  | 0.084228000  |
| C  | 1.837385000  | 1.140408000  | 0.321442000  |
| C  | 0.827433000  | 0.194333000  | 0.293534000  |
| C  | 1.142398000  | -1.139745000 | 0.078895000  |
| C  | 2.427756000  | -1.590278000 | -0.138542000 |
| C  | 3.440660000  | -0.625982000 | -0.143003000 |
| H  | 1.624639000  | 2.181175000  | 0.530588000  |
| H  | 2.653146000  | -2.636311000 | -0.294855000 |
| C  | -1.074650000 | -1.190501000 | 0.270266000  |
| C  | -0.637999000 | 0.255965000  | 0.656493000  |
| C  | -2.323789000 | -1.621099000 | 0.008065000  |
| C  | -1.669523000 | 1.003293000  | -0.828862000 |
| C  | -3.364672000 | -0.636303000 | -0.154001000 |
| H  | -2.538834000 | -2.671303000 | -0.148889000 |
| C  | -3.040432000 | 0.642136000  | -0.518405000 |
| H  | -1.213884000 | 0.463123000  | -1.656145000 |
| O  | 0.027669000  | -1.976120000 | 0.116149000  |
| Cl | 5.074913000  | -1.161168000 | -0.429524000 |
| Cl | 4.415219000  | 1.934911000  | 0.087162000  |
| Cl | -5.001477000 | -1.141136000 | 0.129686000  |
| Cl | -4.208474000 | 1.929768000  | -0.464080000 |
| O  | -1.045529000 | 0.859832000  | 1.671172000  |
| H  | -1.438738000 | 2.062205000  | -0.805071000 |

P6-d-1:

|   |              |              |              |
|---|--------------|--------------|--------------|
| C | -3.452688000 | 0.726797000  | -0.086166000 |
| C | -2.170479000 | 1.265038000  | -0.137587000 |
| C | -1.085831000 | 0.397213000  | -0.074841000 |
| C | -1.295674000 | -0.971933000 | 0.029953000  |
| C | -2.552000000 | -1.542526000 | 0.083998000  |
| C | -3.638731000 | -0.667038000 | 0.024392000  |
| H | -2.024373000 | 2.334212000  | -0.224128000 |
| H | -2.699816000 | -2.610484000 | 0.166300000  |
| C | 0.921113000  | -0.758759000 | 0.015921000  |
| C | 0.373609000  | 0.611183000  | -0.108824000 |
| C | 2.205801000  | -1.318157000 | -0.046839000 |
| C | 3.314335000  | 1.070471000  | 1.760026000  |
| C | 3.427847000  | -0.705325000 | 0.062505000  |
| H | 2.212848000  | -2.389000000 | -0.227043000 |
| C | 3.712389000  | 0.638288000  | 0.565902000  |

|    |              |              |              |
|----|--------------|--------------|--------------|
| H  | 2.748470000  | 0.416605000  | 2.411818000  |
| O  | -0.110198000 | -1.670663000 | 0.072624000  |
| Cl | -5.239268000 | -1.352624000 | 0.089509000  |
| Cl | -4.820121000 | 1.811104000  | -0.161785000 |
| Cl | 4.835165000  | -1.669631000 | -0.343319000 |
| Cl | 4.672869000  | 1.670541000  | -0.487320000 |
| O  | 0.990665000  | 1.657462000  | -0.248723000 |
| H  | 3.534007000  | 2.073113000  | 2.100761000  |

TS6-d-2 :

|    |              |              |              |
|----|--------------|--------------|--------------|
| C  | 3.303247000  | 0.756864000  | -0.158131000 |
| C  | 2.016498000  | 1.285892000  | 0.023850000  |
| C  | 0.995956000  | 0.385914000  | 0.171671000  |
| C  | 1.163142000  | -0.980320000 | 0.258395000  |
| C  | 2.434912000  | -1.510161000 | 0.096432000  |
| C  | 3.500982000  | -0.631644000 | -0.115687000 |
| H  | 1.865048000  | 2.357901000  | 0.034388000  |
| H  | 2.599604000  | -2.579192000 | 0.135490000  |
| C  | -1.082530000 | -1.014362000 | 0.400090000  |
| C  | -1.004682000 | 0.406132000  | 0.894977000  |
| C  | -2.247413000 | -1.501066000 | -0.045758000 |
| C  | -1.945335000 | 1.356469000  | 0.155595000  |
| C  | -3.407793000 | -0.625016000 | -0.188126000 |
| H  | -2.343398000 | -2.543229000 | -0.323418000 |
| C  | -3.286080000 | 0.712313000  | -0.108947000 |
| H  | -1.509407000 | 1.653436000  | -0.807032000 |
| O  | 0.061115000  | -1.769460000 | 0.465528000  |
| Cl | 5.091293000  | -1.316863000 | -0.323823000 |
| Cl | 4.628624000  | 1.861442000  | -0.422696000 |
| Cl | -4.923868000 | -1.417093000 | -0.536108000 |
| Cl | -4.610155000 | 1.805789000  | -0.376679000 |
| O  | -0.605699000 | 0.662626000  | 2.046761000  |
| H  | -2.060801000 | 2.253986000  | 0.764313000  |

P6-d-2:

|   |              |              |              |
|---|--------------|--------------|--------------|
| C | -3.627875000 | -0.564772000 | -0.679639000 |
| C | -2.403377000 | -1.039324000 | -1.171704000 |
| C | -1.266438000 | -0.423621000 | -0.727522000 |
| C | -1.224586000 | 0.611853000  | 0.179781000  |
| C | -2.444793000 | 1.078505000  | 0.666666000  |
| C | -3.635121000 | 0.494904000  | 0.236562000  |
| H | -2.384329000 | -1.858595000 | -1.880184000 |

|    |              |              |              |
|----|--------------|--------------|--------------|
| H  | -2.458283000 | 1.890242000  | 1.383178000  |
| C  | 1.115734000  | 0.591992000  | 0.426251000  |
| C  | 1.342470000  | -0.663076000 | 1.175611000  |
| C  | 2.117276000  | 1.189235000  | -0.253166000 |
| C  | 2.690704000  | -1.346368000 | 0.945233000  |
| C  | 3.449099000  | 0.619785000  | -0.353278000 |
| H  | 1.933451000  | 2.142614000  | -0.733240000 |
| C  | 3.736244000  | -0.567040000 | 0.210820000  |
| H  | 2.475159000  | -2.267070000 | 0.385239000  |
| O  | -0.077886000 | 1.250790000  | 0.585630000  |
| Cl | -5.134501000 | 1.120485000  | 0.877861000  |
| Cl | -5.104432000 | -1.315053000 | -1.231438000 |
| Cl | 4.622352000  | 1.556476000  | -1.243320000 |
| Cl | 5.305216000  | -1.305614000 | 0.116328000  |
| O  | 0.523299000  | -1.135627000 | 1.934859000  |
| H  | 3.067881000  | -1.677926000 | 1.917091000  |

TS6-e:

|    |              |              |              |
|----|--------------|--------------|--------------|
| C  | 3.100469000  | 0.783384000  | -0.348443000 |
| C  | 1.791297000  | 1.259442000  | -0.172374000 |
| C  | 0.832615000  | 0.355427000  | 0.204570000  |
| C  | 1.110378000  | -0.974753000 | 0.443187000  |
| C  | 2.398782000  | -1.460263000 | 0.292618000  |
| C  | 3.394275000  | -0.565267000 | -0.110587000 |
| H  | 1.575926000  | 2.307940000  | -0.339500000 |
| H  | 2.635161000  | -2.498942000 | 0.484736000  |
| C  | -1.103748000 | -1.060792000 | 0.723258000  |
| C  | -1.074218000 | 0.281146000  | 1.232953000  |
| C  | -2.142813000 | -1.512943000 | -0.054386000 |
| C  | -2.158461000 | 1.123046000  | 0.882937000  |
| C  | -3.222911000 | -0.668354000 | -0.345574000 |
| H  | -2.096803000 | -2.506459000 | -0.480669000 |
| C  | -3.203524000 | 0.664919000  | 0.097142000  |
| H  | -2.180384000 | 2.132899000  | 1.273179000  |
| O  | 0.055050000  | -1.793468000 | 0.821193000  |
| Cl | 5.017049000  | -1.183510000 | -0.308322000 |
| Cl | 4.336132000  | 1.909521000  | -0.865037000 |
| Cl | -4.532011000 | -1.292570000 | -1.304014000 |
| Cl | -4.508080000 | 1.760904000  | -0.283529000 |
| O  | -0.375806000 | 0.566871000  | 2.406416000  |
| H  | -1.023230000 | 0.723543000  | 3.104916000  |



P6-e:

|    |              |              |              |
|----|--------------|--------------|--------------|
| C  | 3.533610000  | -0.261181000 | 0.878525000  |
| C  | 2.280441000  | -0.557327000 | 1.433226000  |
| C  | 1.172038000  | -0.224210000 | 0.704202000  |
| C  | 1.186885000  | 0.371553000  | -0.538610000 |
| C  | 2.437477000  | 0.662517000  | -1.085902000 |
| C  | 3.597780000  | 0.349057000  | -0.380671000 |
| H  | 2.215928000  | -1.027448000 | 2.407230000  |
| H  | 2.497103000  | 1.128371000  | -2.061628000 |
| C  | -1.152569000 | 0.271617000  | -0.798616000 |
| C  | -1.534636000 | -1.063794000 | -0.993899000 |
| C  | -2.036290000 | 1.178265000  | -0.237018000 |
| C  | -2.806417000 | -1.463421000 | -0.594054000 |
| C  | -3.312078000 | 0.777864000  | 0.156933000  |
| H  | -1.723220000 | 2.206168000  | -0.110636000 |
| C  | -3.693487000 | -0.552691000 | -0.021122000 |
| H  | -3.123588000 | -2.490333000 | -0.734905000 |
| O  | 0.073431000  | 0.723090000  | -1.254651000 |
| Cl | 5.134832000  | 0.736298000  | -1.116818000 |
| Cl | 4.973186000  | -0.664749000 | 1.781750000  |
| Cl | -4.387108000 | 1.959474000  | 0.861972000  |
| Cl | -5.273965000 | -1.121871000 | 0.453346000  |
| O  | -0.635725000 | -1.899862000 | -1.577152000 |
| H  | -1.002433000 | -2.787666000 | -1.647849000 |

Table S2. Rotational constants and vibrational frequencies at B3LYP/6-311+G(d,p)

| Species      | $I_a, I_b, I_c$<br>(GHZ)   | Frequencies (cm <sup>-1</sup> ) (scaled by 0.9688) Ref. 37                                                                                                                                                                                                                                                                                                                                                                        |
|--------------|----------------------------|-----------------------------------------------------------------------------------------------------------------------------------------------------------------------------------------------------------------------------------------------------------------------------------------------------------------------------------------------------------------------------------------------------------------------------------|
| 2,3,7,8-TCDF | 0.8385<br>0.1311<br>0.1134 | 44.8, 51.8, 100.5, 121.4, 141.2, 187.9, 197.9, 238.0, 245.9, 252.4, 252.7, 338.6, 371.7, 382.4, 387.8, 427.2, 429.2, 439.9, 471.7, 576.3, 618.4, 628.0, 630.2, 656.9, 687.8, 707.0, 709.7, 715.2, 788.6, 837.0, 843.9, 861.3, 865.0, 902.1, 910.5, 1020.3, 1075.3, 1077.4, 1154.3, 1179.0, 1203.3, 1207.8, 1239.5, 1275.0, 1288.8, 1367.8, 1377.1, 1423.2, 1440.0, 1547.5, 1558.9, 1577.9, 1613.3, 3101.8, 3102.7, 3116.3, 3116.5 |
| OH           | 0.0<br>559.7<br>559.7      | 3593.2                                                                                                                                                                                                                                                                                                                                                                                                                            |
| RC1          | 0.6639<br>0.1256<br>0.1095 | 36.0, 45.5, 50.4, 55.3, 100.1, 106.3, 120.9, 126.8, 152.7, 187.9, 198.0, 240.5, 245.4, 251.8, 253.1, 337.4, 371.1, 378.5, 387.5, 421.0, 427.9, 438.2, 442.4, 472.3, 575.9, 604.1, 625.4, 629.8, 655.9, 687.0, 699.3, 707.6, 715.7, 789.6, 827.8, 841.8, 861.3, 866.2, 903.2, 911.3, 1019.8,                                                                                                                                       |

|         |                            |                                                                                                                                                                                                                                                                                                                                                                                                                                                                                      |
|---------|----------------------------|--------------------------------------------------------------------------------------------------------------------------------------------------------------------------------------------------------------------------------------------------------------------------------------------------------------------------------------------------------------------------------------------------------------------------------------------------------------------------------------|
|         |                            | 1074.8, 1077.1, 1153.7, 1180.3, 1203.0, 1208.1, 1238.5, 1278.7, 1292.9, 1357.2, 1375.0, 1420.4, 1437.4, 1542.1, 1557.4, 1567.7, 1609.7, 3103.8, 3104.8, 3119.9, 3136.9, 3617.5                                                                                                                                                                                                                                                                                                       |
| TS1     | 0.6996<br>0.1284<br>0.1126 | <b>348.9i</b> , 42.7, 49.4, 77.3, 104.7, 110.5, 142.9, 174.9, 182.0, 189.3, 199.3, 230.2, 246.6, 248.7, 268.6, 336.5, 364.7, 375.3, 394.7, 411.7, 426.1, 443.4, 471.3, 576.5, 590.0, 625.9, 628.8, 650.2, 663.9, 682.9, 706.9, 719.5, 745.2, 781.2, 828.6, 842.3, 856.9, 864.1, 896.1, 911.8, 1015.9, 1069.8, 1075.8, 1151.2, 1152.8, 1200.5, 1208.0, 1240.1, 1254.1, 1279.0, 1358.1, 1370.7, 1411.5, 1428.8, 1498.2, 1540.4, 1557.7, 1597.1, 3104.6, 3105.6, 3121.4, 3128.1, 3646.6 |
| IM1     | 0.6704<br>0.1309<br>0.1150 | 38.6, 41.8, 73.6, 115.5, 128.0, 162.4, 184.7, 189.3, 197.7, 213.3, 234.3, 246.4, 253.2, 320.8, 338.0, 358.8, 369.6, 407.0, 428.4, 440.8, 474.3, 493.8, 577.3, 589.9, 609.1, 613.4, 643.5, 645.5, 680.3, 698.0, 720.9, 745.9, 786.1, 837.9, 843.0, 860.8, 864.3, 904.0, 928.8, 984.0, 1011.0, 1058.6, 1077.8, 1145.1, 1164.6, 1188.1, 1204.9, 1227.1, 1249.5, 1268.8, 1289.0, 1338.8, 1383.7, 1418.6, 1454.8, 1523.6, 1546.2, 1575.7, 3090.9, 3103.0, 3114.2, 3118.6, 3687.7          |
| TS1-a   | 0.5483<br>0.1352<br>0.1223 | <b>298.4i</b> , 25.5, 45.7, 58.0, 80.2, 126.3, 163.0, 189.6, 195.9, 199.3, 230.1, 238.0, 259.8, 292.0, 306.9, 317.4, 334.1, 370.7, 389.1, 393.5, 419.6, 449.2, 454.4, 517.9, 580.0, 587.3, 596.5, 621.9, 628.1, 668.0, 676.0, 703.8, 711.1, 756.8, 787.7, 806.8, 838.6, 854.8, 870.6, 909.7, 966.9, 1035.3, 1071.1, 1088.7, 1138.6, 1192.1, 1208.4, 1257.6, 1283.8, 1315.0, 1365.4, 1393.1, 1426.1, 1474.5, 1502.2, 1545.2, 1557.7, 1589.4, 3070.5, 3106.4, 3119.1, 3145.8, 3679.1   |
| IM1-a   | 0.6236<br>0.1245<br>0.1063 | 16.9, 40.1, 48.0, 81.3, 93.3, 120.6, 155.0, 170.5, 196.4, 202.7, 225.9, 237.8, 252.0, 270.5, 331.7, 337.8, 372.4, 387.0, 406.4, 423.0, 427.6, 454.3, 479.5, 525.5, 582.6, 612.1, 616.6, 626.4, 660.9, 673.3, 681.5, 698.2, 704.7, 715.4, 769.0, 810.9, 831.2, 853.0, 892.5, 909.4, 973.8, 996.5, 1076.7, 1114.6, 1147.7, 1204.0, 1229.9, 1290.7, 1296.1, 1345.6, 1374.3, 1414.0, 1438.4, 1535.0, 1559.0, 1574.3, 1602.4, 1614.8, 3061.3, 3100.0, 3119.3, 3175.4, 3459.2              |
| TS1-a-1 | 0.6268<br>0.1231<br>0.1045 | <b>147.2i</b> , 12.6, 43.2, 75.5, 87.5, 117.7, 146.3, 188.6, 196.3, 208.3, 222.8, 228.8, 251.1, 278.2, 335.4, 347.5, 372.3, 385.0, 410.3, 424.6, 438.4, 466.0, 509.7, 531.3, 595.5, 613.1, 617.9, 629.3, 675.2, 687.0, 699.8, 702.8, 721.9, 756.6, 771.4, 829.3, 831.8, 854.2, 893.5, 913.0, 980.5, 1007.4, 1076.8, 1129.1, 1151.6, 1205.3, 1236.3, 1290.8, 1325.4, 1360.1, 1375.8, 1416.5, 1436.9, 1462.1, 1542.2, 1560.6, 1571.3, 1601.3, 2711.3, 3061.1, 3099.7, 3118.7, 3129.3,  |
| PI-a-1  | 0.6384<br>0.1265<br>0.1088 | 21.4, 38.9, 42.9, 71.0, 93.6, 108.4, 128.7, 169.1, 183.1, 197.3, 220.2, 227.6, 246.0, 279.1, 337.9, 351.0, 364.3, 393.1, 408.6, 442.3, 458.5, 498.1, 537.4, 599.7, 612.7, 617.2, 632.5, 672.8, 682.5, 697.2, 703.5, 720.4, 736.7, 789.4, 837.5, 856.1, 866.1, 891.4, 905.0, 930.5, 964.4, 993.3, 1080.8, 1105.9, 1166.2, 1206.3, 1236.0, 1269.1, 1312.6, 1355.2, 1379.7, 1400.3, 1422.7, 1473.3, 1533.8, 1568.8, 1605.9, 1757.6, 3052.2,                                             |

|         |                            |                                                                                                                                                                                                                                                                                                                                                                                                                                                                                      |
|---------|----------------------------|--------------------------------------------------------------------------------------------------------------------------------------------------------------------------------------------------------------------------------------------------------------------------------------------------------------------------------------------------------------------------------------------------------------------------------------------------------------------------------------|
|         |                            | 3057.9, 3103.2, 3120.8, 3150.2                                                                                                                                                                                                                                                                                                                                                                                                                                                       |
| TS1-a-2 | 0.5934<br>0.1346<br>0.1177 | <b>2077.1i</b> , 19.4, 31.8, 39.9, 58.1, 93.1, 109.3, 142.5, 159.6, 187.7, 196.3, 204.7, 221.6, 252.8, 285.3, 326.5, 336.7, 350.5, 392.4, 421.4, 440.1, 456.2, 481.1, 513.1, 583.2, 607.1, 620.6, 628.0, 644.7, 650.1, 680.7, 702.5, 715.4, 721.0, 756.0, 801.5, 833.7, 843.3, 862.3, 878.8, 904.4, 988.7, 1001.2, 1070.5, 1111.1, 1132.7, 1201.5, 1218.1, 1286.5, 1315.6, 1338.5, 1368.9, 1430.3, 1533.1, 1561.2, 1588.0, 1596.8, 1632.4, 1723.3, 3065.4, 3105.2, 3120.2, 3188.2    |
| P1-a-2  | 0.5079<br>0.1574<br>0.1415 | 18.6, 35.2, 40.0, 55.2, 93.1, 104.6, 142.1, 166.3, 188.1, 190.9, 195.9, 222.7, 243.5, 289.9, 325.5, 339.0, 345.0, 378.7, 424.9, 450.1, 465.9, 491.1, 518.3, 578.5, 606.4, 618.6, 631.6, 652.7, 658.9, 678.9, 696.0, 713.6, 719.8, 775.8, 826.3, 842.7, 855.2, 883.8, 900.1, 928.3, 976.3, 1007.8, 1062.4, 1083.4, 1163.0, 1188.8, 1201.6, 1224.6, 1274.6, 1281.4, 1318.6, 1360.8, 1443.8, 1563.4, 1594.4, 1598.9, 1637.4, 1831.8, 2920.7, 3080.8, 3101.1, 3119.1, 3188.0             |
| TS1-b   | 0.6447<br>0.1311<br>0.1163 | <b>384.7i</b> , 29.4, 39.4, 68.3, 95.9, 132.2, 156.8, 173.1, 192.6, 205.2, 214.9, 231.0, 243.8, 284.0, 318.1, 343.2, 356.6, 387.7, 413.7, 426.1, 430.5, 433.3, 481.7, 497.5, 520.4, 556.0, 587.6, 616.4, 650.0, 655.9, 675.4, 721.0, 741.7, 767.7, 789.3, 846.0, 863.7, 871.7, 899.6, 918.9, 1034.6, 1081.1, 1096.2, 1126.8, 1164.9, 1200.1, 1205.7, 1209.7, 1245.7, 1276.5, 1331.6, 1358.5, 1413.2, 1433.6, 1513.4, 1519.7, 1577.0, 1646.2, 2965.8, 3025.1, 3108.4, 3116.6, 3703.3  |
| IM1-b   | 0.5738<br>0.1423<br>0.1245 | 24.5, 39.2, 68.0, 80.2, 101.4, 115.7, 139.2, 189.2, 192.7, 204.1, 240.5, 255.3, 287.6, 317.8, 324.1, 329.8, 359.8, 379.9, 400.5, 416.1, 427.4, 470.3, 479.3, 517.2, 553.5, 588.4, 600.6, 617.9, 654.1, 669.8, 677.3, 706.3, 750.3, 761.5, 768.8, 853.6, 862.6, 873.5, 884.1, 950.0, 996.4, 1097.4, 1105.9, 1123.6, 1154.5, 1196.0, 1215.3, 1218.4, 1245.4, 1263.8, 1324.8, 1362.1, 1432.7, 1500.3, 1556.9, 1584.6, 1658.0, 1704.3, 2966.4, 3055.8, 3108.8, 3116.0, 3705.4            |
| TS1-b-1 | 0.5810<br>0.1407<br>0.1251 | <b>2023.7i</b> , 30.1, 39.2, 70.6, 80.9, 111.6, 122.4, 142.0, 189.1, 191.1, 203.0, 243.3, 255.9, 288.1, 300.6, 328.3, 331.2, 357.0, 398.3, 408.9, 434.8, 447.0, 464.7, 513.7, 544.1, 586.9, 601.8, 634.0, 639.9, 667.2, 669.4, 703.1, 717.8, 766.6, 772.7, 850.1, 870.7, 882.8, 897.3, 953.3, 1014.2, 1077.7, 1093.0, 1104.2, 1121.8, 1179.2, 1215.4, 1241.4, 1255.6, 1278.4, 1327.6, 1391.2, 1424.7, 1475.5, 1491.6, 1552.6, 1567.1, 1726.6, 1846.7, 2959.4, 3048.5, 3111.6, 3115.4 |
| P1-b-1  | 0.5502<br>0.1459<br>0.1315 | 24.2, 38.8, 64.6, 69.6, 112.2, 117.3, 149.1, 184.6, 191.4, 202.1, 233.1, 254.2, 271.7, 293.6, 310.7, 326.0, 356.9, 393.8, 408.8, 421.7, 440.9, 466.3, 513.5, 526.8, 591.8, 600.8, 625.9, 651.1, 665.0, 679.5, 696.6, 744.0, 757.3, 834.6, 842.6, 857.0, 874.1, 924.6, 942.7, 980.0, 1078.2, 1093.1, 1110.7, 1119.6, 1185.6, 1211.2, 1215.5, 1245.2, 1255.7, 1292.7, 1331.8, 1410.9, 1420.8, 1486.1, 1547.4, 1605.1, 1724.3, 1781.3, 2963.9, 2981.1, 3004.3, 3110.6, 3115.2           |
| TS1-b-2 | 0.5130                     | <b>1797.5i</b> , 35.2, 42.9, 55.6, 98.2, 131.3, 165.6, 169.3, 191.7, 209.9, 234.4,                                                                                                                                                                                                                                                                                                                                                                                                   |

|         |                            |                                                                                                                                                                                                                                                                                                                                                                                                                                                                                       |
|---------|----------------------------|---------------------------------------------------------------------------------------------------------------------------------------------------------------------------------------------------------------------------------------------------------------------------------------------------------------------------------------------------------------------------------------------------------------------------------------------------------------------------------------|
|         | 0.1627<br>0.1549           | 260.2, 299.3, 317.1, 333.9, 360.4, 400.6, 409.2, 416.8, 447.0, 452.0, 486.0, 499.1, 547.4, 576.5, 610.8, 636.2, 652.3, 655.4, 676.6, 700.2, 743.9, 751.8, 777.2, 803.7, 848.8, 864.9, 872.7, 880.9, 944.8, 1034.6, 1092.7, 1096.6, 1111.2, 1132.9, 1162.1, 1210.3, 1221.4, 1259.5, 1285.0, 1293.4, 1341.3, 1414.8, 1432.0, 1496.3, 1515.5, 1558.9, 1561.5, 1588.5, 3015.1, 3080.0, 3106.6, 3114.1                                                                                     |
| P1-b-2  | 0.6503<br>0.1364<br>0.1220 | 16.2, 36.5, 47.9, 81.1, 88.5, 137.4, 146.4, 185.7, 205.8, 217.7, 225.4, 246.5, 269.3, 289.8, 335.0, 338.2, 381.6, 405.8, 427.6, 441.3, 486.1, 498.6, 530.7, 553.9, 607.2, 615.4, 649.6, 655.3, 677.6, 712.7, 727.0, 753.3, 782.3, 804.4, 841.9, 862.8, 868.5, 887.0, 933.5, 953.1, 967.7, 1098.8, 1116.1, 1156.7, 1174.4, 1218.6, 1222.8, 1258.4, 1283.5, 1326.9, 1356.3, 1405.4, 1433.6, 1456.2, 1531.8, 1573.0, 1582.0, 1726.3, 2994.6, 3044.7, 3095.5, 3117.7, 3118.5              |
| TS1-c   | 0.6808<br>0.1296<br>0.1134 | <b>1704.1i</b> , 37.8, 46.0, 80.7, 117.7, 129.3, 177.8, 186.3, 197.4, 212.4, 232.8, 244.1, 259.1, 322.2, 335.8, 359.7, 370.8, 412.3, 428.0, 458.9, 480.4, 514.9, 570.4, 597.6, 614.0, 621.4, 651.6, 655.7, 682.3, 718.7, 728.0, 743.8, 822.4, 837.6, 842.4, 850.9, 868.3, 898.5, 919.4, 994.2, 1033.4, 1051.0, 1078.7, 1109.0, 1138.9, 1162.5, 1192.2, 1206.6, 1240.5, 1270.9, 1295.7, 1331.2, 1375.0, 1389.9, 1428.5, 1536.7, 1583.6, 1590.3, 1885.7, 3050.2, 3093.7, 3102.8, 3118.4 |
| IM1-c   | 0.7155<br>0.1289<br>0.1129 | 38.4, 48.0, 85.8, 101.7, 121.7, 171.5, 184.7, 195.8, 207.9, 211.9, 238.5, 244.1, 301.8, 314.8, 327.5, 367.4, 377.6, 427.1, 427.4, 472.9, 482.4, 550.0, 569.3, 594.4, 616.8, 628.9, 645.4, 662.1, 691.0, 717.1, 728.8, 823.6, 834.3, 844.4, 867.4, 884.8, 903.2, 915.5, 985.2, 1010.7, 1043.0, 1079.3, 1123.4, 1143.1, 1165.1, 1203.0, 1208.6, 1254.7, 1271.4, 1290.8, 1302.2, 1363.9, 1405.3, 1428.7, 1440.7, 1537.3, 1570.9, 1591.1, 2933.5, 3002.5, 3089.6, 3103.0, 3118.9          |
| TS1-c-1 | 0.6824<br>0.1305<br>0.1140 | <b>450.0i</b> , 35.9, 44.8, 70.5, 92.8, 125.3, 149.2, 181.5, 193.8, 199.3, 213.6, 239.4, 276.9, 325.9, 336.3, 354.7, 356.3, 380.0, 419.4, 442.3, 464.1, 482.8, 570.6, 574.3, 589.4, 603.0, 608.0, 636.5, 658.2, 669.1, 689.4, 711.3, 722.1, 802.8, 837.7, 843.1, 864.9, 869.4, 906.7, 956.2, 982.9, 1027.9, 1082.5, 1094.2, 1156.6, 1187.4, 1207.3, 1241.1, 1266.7, 1303.3, 1374.4, 1385.8, 1414.5, 1424.6, 1518.6, 1567.5, 1569.2, 1602.0, 3017.7, 3071.0, 3102.0, 3115.9, 3119.6    |
| P1-c-1  | 0.6385<br>0.1265<br>0.1088 | 21.3, 38.7, 42.7, 71.0, 93.7, 108.4, 128.9, 169.1, 183.1, 197.4, 220.1, 227.6, 245.9, 279.2, 338.0, 351.0, 364.3, 393.1, 408.5, 442.3, 458.5, 498.1, 537.5, 599.8, 612.6, 617.1, 632.5, 672.8, 682.5, 697.1, 703.4, 720.4, 736.7, 789.5, 837.5, 856.1, 866.1, 891.3, 904.9, 930.6, 964.5, 993.4, 1080.8, 1106.0, 1166.3, 1206.3, 1236.1, 1269.2, 1312.6, 1355.2, 1379.8, 1400.2, 1422.8, 1473.2, 1533.9, 1568.9, 1605.8, 1757.6, 3052.2, 3057.9, 3103.2, 3120.8, 3150.2               |
| TS1-c-2 | 0.7142<br>0.1275<br>0.1109 | <b>290.5i</b> , 31.1, 43.8, 87.7, 93.3, 111.1, 137.4, 174.8, 182.3, 201.1, 209.6, 230.5, 241.2, 297.4, 313.3, 323.2, 344.7, 373.8, 413.4, 431.0, 443.4, 472.1, 501.4, 541.2, 558.1, 608.9, 615.3, 639.7, 662.4, 667.4, 702.7,                                                                                                                                                                                                                                                         |

|         |                            |                                                                                                                                                                                                                                                                                                                                                                                                                                                                                      |
|---------|----------------------------|--------------------------------------------------------------------------------------------------------------------------------------------------------------------------------------------------------------------------------------------------------------------------------------------------------------------------------------------------------------------------------------------------------------------------------------------------------------------------------------|
|         |                            | 754.3, 769.5, 807.6, 845.2, 865.9, 872.0, 914.2, 939.9, 981.4, 1018.7, 1082.8, 1101.3, 1132.6, 1183.6, 1200.2, 1216.0, 1259.6, 1265.9, 1286.4, 1351.2, 1407.5, 1429.5, 1511.4, 1558.3, 1571.0, 1595.1, 1684.9, 2951.3, 2989.4, 2997.8, 3108.5, 3117.7                                                                                                                                                                                                                                |
| P1-c-2  | 0.6088<br>0.1411<br>0.1229 | 23.0, 46.1, 69.3, 71.9, 100.5, 113.3, 150.4, 177.5, 190.0, 202.7, 211.6, 259.7, 272.2, 291.1, 324.8, 347.2, 365.1, 387.9, 417.5, 428.5, 438.4, 446.4, 518.4, 535.5, 578.0, 593.4, 620.4, 641.8, 654.6, 697.9, 711.4, 754.5, 778.8, 815.3, 832.1, 850.0, 882.8, 914.5, 943.5, 982.5, 1052.9, 1076.6, 1088.1, 1120.5, 1161.1, 1208.4, 1213.1, 1234.4, 1265.4, 1286.2, 1331.8, 1404.3, 1421.7, 1463.5, 1527.9, 1592.2, 1782.1, 1796.9, 2957.9, 2985.9, 3036.6, 3113.1, 3115.4           |
| TS1-c-3 | 0.6897<br>0.1301<br>0.1138 | <b>793.6i</b> , 41.4, 45.1, 84.8, 98.5, 119.0, 173.1, 188.4, 197.8, 204.6, 222.8, 234.0, 253.8, 305.1, 321.2, 324.8, 352.1, 373.3, 419.8, 433.4, 464.6, 475.3, 542.8, 579.9, 589.4, 616.4, 629.7, 641.0, 669.7, 685.5, 728.1, 746.6, 817.8, 841.7, 865.4, 867.5, 883.8, 917.2, 983.5, 1017.1, 1059.2, 1075.6, 1125.2, 1158.0, 1175.1, 1206.2, 1226.6, 1261.2, 1286.7, 1305.3, 1322.9, 1379.9, 1397.5, 1420.9, 1435.0, 1478.4, 1517.5, 1572.1, 2927.7, 3008.8, 3085.6, 3101.3, 3119.8 |
| P1-c-3  | 0.6235<br>0.1259<br>0.1117 | 25.3, 33.3, 40.3, 76.2, 102.7, 115.5, 160.5, 164.3, 187.6, 196.0, 202.2, 205.7, 266.0, 282.0, 319.1, 334.5, 372.9, 375.6, 389.1, 425.0, 433.1, 500.5, 548.9, 568.4, 574.4, 589.3, 609.9, 638.5, 642.2, 687.8, 709.7, 734.5, 835.4, 851.4, 877.8, 897.8, 906.8, 919.0, 986.1, 1032.9, 1073.7, 1089.0, 1144.1, 1157.1, 1187.8, 1203.4, 1243.0, 1275.3, 1289.2, 1323.4, 1368.4, 1373.6, 1430.9, 1459.6, 1517.2, 1531.7, 1608.4, 1700.4, 2905.8, 2993.8, 3082.3, 3093.5, 3113.0,         |
| TS1-d   | 0.6344<br>0.1343<br>0.1197 | <b>1665.9i</b> , 37.4, 42.2, 65.6, 117.9, 144.8, 184.2, 192.7, 202.4, 215.5, 247.9, 254.2, 302.3, 317.9, 339.1, 348.4, 380.3, 417.7, 440.3, 451.6, 475.0, 495.7, 599.9, 604.3, 612.1, 620.9, 645.6, 658.1, 674.0, 700.6, 720.4, 752.4, 816.1, 832.9, 841.2, 844.5, 869.1, 903.8, 928.2, 958.6, 991.9, 1020.9, 1059.6, 1081.6, 1123.2, 1191.1, 1206.0, 1227.9, 1265.0, 1271.9, 1280.3, 1333.6, 1369.3, 1429.0, 1468.2, 1544.9, 1579.8, 1587.1, 1859.7, 3098.3, 3100.8, 3109.5, 3118.3 |
| IM1-d   | 0.5342<br>0.1466<br>0.1306 | 21.2, 38.9, 57.7, 92.8, 139.4, 170.2, 191.3, 197.0, 207.8, 244.0, 254.1, 280.1, 286.1, 331.8, 335.4, 355.6, 409.6, 416.7, 425.2, 462.1, 493.1, 553.9, 585.2, 601.0, 613.7, 630.2, 644.4, 665.8, 676.1, 712.7, 742.7, 818.8, 819.9, 837.3, 861.3, 880.6, 895.8, 919.8, 956.9, 1013.5, 1034.1, 1084.6, 1098.9, 1148.6, 1191.4, 1202.5, 1219.0, 1230.8, 1239.8, 1277.3, 1286.6, 1317.5, 1361.2, 1424.0, 1449.0, 1558.3, 1570.4, 1589.1, 2915.0, 3087.7, 3095.3, 3117.8, 3137.3          |
| TS1-d-1 | 0.4571<br>0.1636<br>0.1489 | <b>364.7i</b> , 25.1, 39.5, 50.8, 83.9, 143.3, 172.9, 187.2, 193.7, 196.5, 218.4, 257.1, 266.9, 298.5, 326.9, 336.1, 352.7, 375.9, 418.3, 426.5, 455.2, 469.0, 534.6, 575.2, 598.0, 615.4, 623.2, 643.9, 658.1, 667.6, 684.2, 716.1, 736.4, 810.9, 814.1, 842.0, 865.0, 879.5, 907.6, 927.2, 964.4, 1022.0, 1067.5, 1084.2, 1151.8, 1178.2, 1199.9, 1224.5, 1279.4, 1280.8,                                                                                                          |

|         |                            |                                                                                                                                                                                                                                                                                                                                                                                                                                                                                      |
|---------|----------------------------|--------------------------------------------------------------------------------------------------------------------------------------------------------------------------------------------------------------------------------------------------------------------------------------------------------------------------------------------------------------------------------------------------------------------------------------------------------------------------------------|
|         |                            | 1303.9, 1359.3, 1441.7, 1555.0, 1572.0, 1587.0, 1605.0, 1621.4, 2915.5, 3093.9, 3099.9, 3117.7, 3185.7                                                                                                                                                                                                                                                                                                                                                                               |
| P1-d-1  | 0.4256<br>0.2008<br>0.1624 | 18.3, 29.5, 43.0, 53.6, 83.3, 103.3, 138.3, 159.1, 181.1, 195.4, 204.4, 215.7, 247.7, 291.7, 317.7, 336.6, 347.1, 371.5, 426.7, 450.9, 464.9, 496.2, 513.4, 586.5, 603.5, 618.7, 635.8, 646.4, 662.7, 678.2, 687.8, 705.7, 725.7, 770.2, 826.8, 839.5, 853.2, 883.2, 903.3, 925.5, 974.7, 1016.4, 1050.0, 1084.0, 1166.5, 1187.4, 1202.8, 1224.4, 1274.1, 1283.3, 1319.3, 1362.7, 1445.9, 1566.4, 1596.9, 1601.2, 1645.6, 1825.0, 2926.8, 3087.8, 3102.0, 3118.2, 3195.3             |
| TS1-d-2 | 0.4601<br>0.1701<br>0.1528 | <b>322.7i</b> , 34.0, 43.2, 54.0, 105.5, 158.9, 188.6, 194.2, 196.3, 200.5, 239.8, 256.9, 282.1, 287.0, 307.4, 340.1, 355.4, 412.7, 423.7, 434.6, 459.1, 496.6, 540.4, 564.4, 574.8, 608.0, 619.7, 658.3, 662.2, 674.7, 715.3, 741.6, 779.6, 832.1, 841.1, 854.7, 865.3, 888.0, 924.1, 932.2, 1015.0, 1046.0, 1060.0, 1088.5, 1147.6, 1204.6, 1225.5, 1238.6, 1266.7, 1303.9, 1323.3, 1356.4, 1418.4, 1453.2, 1512.4, 1534.9, 1572.0, 1578.3, 3004.7, 3072.9, 3094.0, 3103.5, 3117.5 |
| P1-d-2  | 0.5133<br>0.1625<br>0.1506 | 19.8, 38.3, 44.8, 58.0, 103.1, 142.2, 160.3, 175.7, 187.6, 200.2, 222.9, 231.4, 260.0, 288.7, 331.3, 348.4, 371.6, 400.0, 443.8, 464.8, 487.6, 497.6, 516.6, 548.1, 589.9, 602.0, 625.7, 654.4, 665.3, 692.7, 724.5, 760.2, 773.1, 815.0, 850.6, 866.6, 878.8, 896.0, 913.4, 945.9, 976.6, 1099.5, 1109.2, 1134.2, 1174.9, 1209.3, 1227.0, 1237.9, 1278.5, 1310.5, 1324.9, 1413.8, 1438.2, 1452.1, 1520.1, 1559.1, 1614.1, 1779.6, 3048.1, 3065.0, 3089.8, 3096.5, 3106.9            |
| TS1-d-3 | 0.5695<br>0.1408<br>0.1273 | <b>714.9i</b> , 22.1, 37.3, 55.5, 97.3, 142.9, 169.8, 183.6, 195.5, 202.2, 234.4, 245.8, 275.7, 291.3, 317.8, 339.8, 376.6, 395.9, 424.6, 436.0, 456.9, 488.0, 552.5, 596.9, 603.6, 616.2, 629.7, 644.1, 648.0, 690.4, 718.6, 751.5, 817.3, 834.6, 842.1, 857.0, 874.0, 927.2, 950.2, 1013.2, 1032.4, 1082.7, 1110.2, 1161.3, 1170.6, 1173.9, 1211.8, 1241.7, 1246.5, 1261.3, 1300.2, 1322.7, 1373.7, 1431.2, 1483.0, 1505.5, 1552.3, 1581.9, 2939.9, 3084.4, 3092.7, 3118.9, 3123.1 |
| P1-d-3  | 0.6651<br>0.1245<br>0.1224 | 14.8, 24.3, 38.4, 72.6, 92.8, 138.5, 151.9, 162.8, 194.0, 200.6, 204.0, 218.3, 282.1, 287.7, 335.6, 354.3, 369.0, 374.1, 420.8, 424.8, 473.6, 503.4, 545.1, 589.4, 607.4, 617.2, 620.3, 632.2, 643.7, 710.8, 725.5, 752.1, 811.5, 839.2, 843.9, 865.1, 876.9, 930.9, 968.2, 1022.6, 1057.6, 1082.3, 1119.9, 1163.6, 1191.6, 1204.4, 1219.3, 1225.9, 1256.2, 1300.0, 1320.4, 1384.8, 1435.9, 1454.8, 1527.0, 1539.3, 1605.8, 1674.4, 2892.4, 3089.2, 3089.7, 3109.6, 3112.6           |
| TS1-e   | 0.6373<br>0.1323<br>0.1161 | <b>460.2i</b> , 38.5, 42.4, 70.4, 97.6, 142.0, 179.9, 196.9, 199.3, 206.4, 234.5, 242.1, 277.6, 279.6, 308.5, 353.7, 370.5, 372.7, 400.7, 423.7, 442.9, 459.7, 491.7, 568.7, 581.8, 616.2, 628.1, 640.0, 640.3, 656.9, 690.3, 729.3, 751.9, 786.0, 837.1, 851.9, 864.2, 869.2, 922.8, 997.7, 1068.6, 1076.9, 1106.0, 1155.4, 1186.7, 1211.1, 1232.3, 1259.2, 1262.7, 1315.6, 1334.4, 1381.1, 1405.3, 1431.9, 1451.4, 1474.3, 1525.0, 1553.2, 3094.5, 3095.9, 3096.5, 3115.4, 3669.8  |

|         |                            |                                                                                                                                                                                                                                                                                                                                                                                                                                                                                     |
|---------|----------------------------|-------------------------------------------------------------------------------------------------------------------------------------------------------------------------------------------------------------------------------------------------------------------------------------------------------------------------------------------------------------------------------------------------------------------------------------------------------------------------------------|
| P1-e    | 0.6135<br>0.1270<br>0.1137 | 31.4, 35.1, 43.6, 93.8, 109.5, 158.1, 168.5, 173.1, 193.0, 202.5, 208.5, 233.7, 264.5, 278.1, 287.4, 350.8, 374.5, 382.1, 386.7, 428.5, 432.6, 458.6, 506.8, 554.3, 569.0, 606.7, 626.3, 638.7, 661.1, 673.8, 716.7, 728.2, 742.3, 824.5, 850.2, 870.7, 880.7, 888.0, 926.0, 1006.9, 1083.1, 1110.5, 1123.7, 1167.7, 1203.5, 1217.6, 1238.5, 1256.7, 1284.2, 1294.0, 1342.4, 1378.2, 1427.1, 1451.9, 1467.6, 1518.7, 1547.9, 1577.5, 3082.7, 3092.5, 3097.8, 3111.1, 3718.2,        |
| RC2     | 0.6639<br>0.1255<br>0.1095 | 35.6, 46.0, 50.2, 55.5, 100.1, 106.3, 121.5, 126.5, 152.7, 187.9, 198.0, 240.5, 245.4, 251.6, 253.0, 337.3, 371.0, 378.3, 387.5, 420.7, 427.8, 438.1, 442.3, 472.3, 576.0, 604.1, 625.4, 629.8, 655.9, 687.0, 699.4, 707.7, 715.7, 789.6, 827.8, 841.8, 861.3, 866.2, 903.4, 911.2, 1019.9, 1074.7, 1077.1, 1153.6, 1180.2, 1203.0, 1208.1, 1238.6, 1278.7, 1293.7, 1357.3, 1375.2, 1420.4, 1437.4, 1542.3, 1557.3, 1567.7, 1609.7, 3103.8, 3104.9, 3119.9, 3136.5, 3616.7          |
| TS2     | 0.6852<br>0.1255<br>0.1089 | <b>309.0i</b> , 42.0, 49.5, 75.6, 90.2, 101.3, 128.6, 133.6, 146.9, 188.1, 198.4, 236.1, 244.8, 249.8, 251.9, 335.8, 367.9, 385.4, 387.6, 425.5, 429.1, 440.3, 475.5, 575.4, 610.2, 623.9, 631.6, 655.2, 686.6, 692.0, 708.4, 716.2, 741.2, 789.3, 839.7, 848.9, 863.8, 892.4, 900.5, 914.6, 1018.6, 1070.9, 1076.2, 1146.9, 1175.2, 1197.3, 1205.2, 1228.6, 1280.5, 1294.0, 1334.0, 1371.3, 1413.7, 1431.1, 1520.4, 1543.1, 1556.7, 1603.0, 3105.0, 3108.1, 3118.7, 3129.6, 3634.6 |
| IM2     | 0.6910<br>0.1257<br>0.1075 | 38.6, 48.9, 68.9, 96.1, 118.9, 126.5, 149.9, 184.1, 196.0, 200.5, 236.3, 243.3, 252.4, 276.6, 330.8, 364.0, 375.9, 386.1, 422.2, 425.9, 465.8, 491.1, 561.6, 580.3, 620.5, 634.7, 644.4, 677.7, 681.8, 705.7, 731.8, 746.0, 789.9, 840.4, 861.4, 879.1, 891.3, 927.9, 993.3, 1032.1, 1073.5, 1120.7, 1146.3, 1165.9, 1178.5, 1202.3, 1218.2, 1265.0, 1283.8, 1301.5, 1331.1, 1352.5, 1372.1, 1424.4, 1478.4, 1518.5, 1553.4, 1598.8, 2881.6, 3104.7, 3117.9, 3121.6, 3704.1         |
| TS2-a   | 0.6062<br>0.1272<br>0.1104 | <b>319.8i</b> , 38.6, 41.7, 59.1, 95.2, 105.7, 127.8, 153.1, 179.2, 186.3, 198.1, 212.6, 240.6, 275.1, 285.8, 326.3, 344.6, 355.6, 396.0, 415.5, 423.2, 469.6, 478.4, 519.7, 548.4, 608.8, 618.8, 641.5, 672.4, 683.3, 700.1, 726.4, 762.3, 786.6, 824.0, 837.4, 844.5, 864.3, 898.4, 974.2, 1073.4, 1084.7, 1109.5, 1153.0, 1161.2, 1205.4, 1224.0, 1234.2, 1277.0, 1297.8, 1362.5, 1400.7, 1422.1, 1430.1, 1530.3, 1553.3, 1574.3, 1602.6, 3053.2, 3087.8, 3102.1, 3118.6, 3687.1 |
| IM2-a   | 0.5849<br>0.1247<br>0.1068 | 22.0, 32.5, 48.4, 72.1, 83.3, 112.5, 136.8, 162.8, 176.2, 194.6, 198.2, 224.8, 249.8, 264.6, 283.2, 320.3, 341.3, 366.5, 382.7, 393.8, 420.5, 477.6, 484.2, 521.6, 545.8, 604.2, 616.9, 643.8, 658.9, 686.7, 707.5, 710.3, 741.2, 785.2, 813.5, 830.9, 833.6, 860.7, 896.7, 962.8, 1048.5, 1081.2, 1099.3, 1163.2, 1172.7, 1208.7, 1234.1, 1245.0, 1279.0, 1307.1, 1359.2, 1395.6, 1439.1, 1557.0, 1560.5, 1592.9, 1612.4, 1678.1, 3060.6, 3085.2, 3099.0, 3118.0, 3729.4,          |
| TS2-a-1 | 0.5703                     | <b>479.3i</b> , 22.0, 34.9, 46.7, 80.2, 84.1, 116.6, 140.5, 161.2, 173.1, 193.4,                                                                                                                                                                                                                                                                                                                                                                                                    |

|         |                            |                                                                                                                                                                                                                                                                                                                                                                                                                                                                                      |
|---------|----------------------------|--------------------------------------------------------------------------------------------------------------------------------------------------------------------------------------------------------------------------------------------------------------------------------------------------------------------------------------------------------------------------------------------------------------------------------------------------------------------------------------|
|         | 0.1251<br>0.1077           | 198.4, 222.6, 249.8, 274.9, 289.7, 322.7, 359.3, 386.2, 394.5, 420.8, 475.9, 484.5, 520.0, 549.3, 607.7, 625.1, 645.1, 666.0, 688.0, 707.8, 716.4, 744.0, 789.4, 807.7, 833.4, 837.0, 861.4, 898.9, 968.6, 1058.8, 1081.5, 1096.7, 1129.5, 1170.0, 1192.1, 1209.3, 1237.0, 1276.7, 1302.4, 1357.5, 1393.5, 1437.1, 1542.5, 1559.2, 1590.5, 1592.6, 1654.1, 3052.3, 3061.3, 3098.2, 3118.3, 3565.8                                                                                    |
| P2-a-1  | 0.5729<br>0.1260<br>0.1076 | 30.2, 40.8, 44.2, 73.2, 92.7, 118.1, 141.5, 173.9, 193.6, 200.6, 202.1, 230.1, 235.6, 245.0, 298.1, 321.0, 357.1, 379.5, 398.6, 423.2, 467.7, 485.5, 523.8, 544.9, 604.8, 631.5, 645.5, 663.9, 691.9, 708.0, 728.6, 742.5, 761.5, 779.6, 840.2, 861.7, 870.7, 903.7, 961.0, 966.7, 1075.8, 1102.3, 1125.3, 1182.6, 1209.1, 1219.7, 1237.2, 1256.6, 1300.5, 1358.2, 1374.6, 1377.3, 1418.3, 1446.8, 1463.0, 1553.5, 1591.0, 1663.0, 2849.3, 3070.7, 3104.2, 3118.7, 3146.5            |
| TS2-b   | 0.6175<br>0.1256<br>0.1116 | <b>228.8i</b> , 27.7, 44.0, 47.6, 91.0, 113.6, 130.4, 148.1, 172.7, 194.2, 203.5, 245.2, 254.3, 275.8, 316.3, 323.3, 355.9, 367.8, 383.4, 419.8, 427.3, 448.3, 480.6, 521.3, 564.4, 587.8, 623.7, 637.6, 646.3, 700.5, 712.3, 731.5, 795.9, 836.8, 856.6, 857.8, 875.1, 889.2, 903.9, 1011.1, 1018.5, 1066.8, 1118.5, 1137.8, 1151.9, 1204.6, 1218.9, 1225.8, 1277.3, 1285.5, 1341.8, 1373.2, 1403.7, 1455.3, 1529.8, 1535.3, 1552.6, 1589.9, 3077.8, 3079.3, 3102.0, 3118.3, 3709.1 |
| IM2-b   | 0.6074<br>0.1227<br>0.1098 | 20.1, 27.1, 44.4, 54.4, 95.3, 109.4, 127.2, 148.7, 167.7, 196.5, 208.8, 240.5, 250.8, 259.0, 302.2, 314.5, 333.0, 365.2, 380.7, 419.2, 422.6, 439.1, 502.2, 517.2, 555.5, 568.1, 619.5, 643.5, 654.8, 699.1, 704.7, 741.0, 794.0, 834.3, 855.6, 866.6, 873.6, 878.3, 904.8, 996.3, 1031.2, 1068.3, 1134.7, 1145.9, 1153.8, 1205.3, 1224.2, 1227.7, 1285.5, 1299.4, 1359.4, 1378.2, 1410.3, 1491.1, 1545.8, 1593.4, 1600.6, 1641.3, 3078.7, 3079.0, 3104.6, 3119.8, 3736.7            |
| TS2-b-1 | 0.6161<br>0.1205<br>0.1062 | <b>561.1i</b> , 18.1, 37.6, 49.7, 79.7, 109.0, 127.1, 132.7, 173.8, 193.2, 198.4, 242.2, 245.4, 272.5, 305.2, 317.6, 335.4, 368.3, 395.9, 415.0, 421.3, 438.4, 484.7, 522.7, 548.2, 589.4, 615.6, 640.7, 647.8, 699.3, 707.0, 731.9, 794.0, 838.1, 858.1, 863.2, 883.7, 890.8, 898.6, 969.7, 975.5, 1068.6, 1115.9, 1129.6, 1163.7, 1201.5, 1214.5, 1266.6, 1279.6, 1335.9, 1366.5, 1381.2, 1401.6, 1450.9, 1543.7, 1563.0, 1585.6, 1587.7, 3076.8, 3087.2, 3106.0, 3120.7, 3411.7   |
| P2-b-1  | 0.6690<br>0.1188<br>0.1062 | 18.6, 35.5, 41.9, 69.6, 100.0, 118.8, 137.8, 164.1, 185.4, 198.4, 210.9, 227.6, 246.3, 285.8, 315.8, 326.2, 361.1, 375.6, 381.1, 420.3, 423.0, 488.5, 529.6, 545.7, 577.6, 623.9, 639.3, 651.1, 693.9, 714.4, 759.4, 777.5, 803.1, 812.6, 841.0, 861.1, 898.0, 912.5, 953.8, 985.5, 1058.7, 1075.3, 1134.5, 1155.2, 1195.2, 1208.7, 1243.9, 1266.6, 1290.5, 1330.1, 1374.0, 1382.3, 1427.0, 1452.3, 1482.6, 1558.2, 1597.7, 1659.5, 2857.8, 3069.6, 3104.4, 3120.1, 3182.2           |
| TS2-b-2 | 0.6362<br>0.1255           | <b>306.1i</b> , 16.0, 43.6, 72.9, 110.0, 113.3, 123.8, 125.6, 156.5, 176.2, 196.3, 242.5, 256.7, 261.3, 312.6, 325.6, 344.7, 370.9, 376.5, 413.7, 420.2,                                                                                                                                                                                                                                                                                                                             |



|         |                            |                                                                                                                                                                                                                                                                                                                                                                                                                                                                                      |
|---------|----------------------------|--------------------------------------------------------------------------------------------------------------------------------------------------------------------------------------------------------------------------------------------------------------------------------------------------------------------------------------------------------------------------------------------------------------------------------------------------------------------------------------|
|         | 0.1141                     | 434.4, 447.1, 512.6, 554.2, 595.3, 626.1, 642.0, 651.6, 700.4, 711.2, 749.2, 768.1, 793.8, 837.0, 855.3, 864.3, 875.1, 897.3, 981.2, 1016.4, 1065.8, 1111.7, 1139.8, 1159.7, 1206.1, 1221.2, 1227.8, 1287.3, 1304.2, 1338.2, 1385.9, 1413.4, 1483.2, 1527.0, 1541.7, 1588.3, 1592.8, 3087.3, 3103.3, 3107.2, 3117.0, 3721.2                                                                                                                                                          |
| P2-b-2  | 0.6802<br>0.1218<br>0.1075 | 30.2, 46.3, 50.8, 93.9, 104.5, 120.5, 135.4, 179.3, 195.8, 221.8, 227.0, 255.8, 299.1, 331.0, 342.7, 357.6, 367.5, 386.0, 419.0, 427.1, 447.4, 468.9, 534.6, 570.7, 604.9, 620.3, 634.5, 651.2, 666.8, 683.6, 705.0, 734.8, 749.6, 769.8, 836.9, 862.6, 879.3, 926.2, 994.2, 1029.5, 1069.2, 1087.8, 1118.3, 1152.4, 1194.4, 1204.1, 1224.6, 1245.2, 1260.4, 1292.9, 1328.7, 1371.2, 1396.2, 1415.6, 1491.3, 1548.8, 1555.9, 1601.4, 2998.0, 3109.2, 3120.0, 3153.0, 3688.7          |
| TS2-c   | 0.6816<br>0.1258<br>0.1097 | <b>1761.7i</b> , 38.2, 46.4, 84.4, 99.9, 119.2, 156.0, 177.2, 189.2, 212.1, 241.3, 250.7, 269.7, 287.0, 330.1, 376.6, 386.8, 403.0, 422.7, 450.2, 475.6, 510.5, 570.4, 576.6, 623.1, 642.3, 665.3, 679.6, 713.3, 738.9, 766.1, 787.7, 840.8, 857.2, 860.4, 869.2, 886.1, 898.1, 960.1, 981.2, 1031.5, 1073.3, 1117.0, 1148.0, 1168.9, 1186.1, 1208.0, 1231.2, 1260.5, 1286.0, 1329.9, 1356.6, 1394.1, 1428.8, 1494.2, 1549.8, 1578.8, 1599.0, 1891.3, 2982.2, 3100.0, 3104.4, 3118.2 |
| IM2-c   | 0.6195<br>0.1352<br>0.1203 | 38.5, 46.7, 75.2, 102.7, 116.3, 140.1, 154.5, 176.0, 197.8, 228.6, 253.9, 262.6, 285.4, 333.1, 355.7, 377.0, 387.6, 419.9, 431.3, 435.5, 506.2, 548.1, 558.3, 618.4, 642.8, 659.0, 668.4, 690.2, 713.0, 743.7, 780.5, 821.9, 841.3, 860.1, 863.1, 899.2, 926.2, 984.5, 1035.0, 1053.9, 1071.6, 1133.3, 1144.1, 1171.0, 1187.3, 1208.9, 1234.1, 1249.3, 1269.7, 1286.8, 1337.3, 1354.6, 1403.3, 1423.7, 1460.9, 1541.5, 1574.2, 1588.3, 2921.8, 3035.2, 3103.3, 3106.6, 3119.9        |
| TS2-c-1 | 0.5745<br>0.1370<br>0.1221 | <b>408.3i</b> , 33.4, 43.1, 63.1, 96.7, 111.8, 134.3, 148.6, 164.6, 195.3, 235.7, 247.8, 267.7, 279.1, 311.1, 333.3, 362.6, 400.1, 417.3, 422.8, 461.0, 485.8, 525.5, 554.1, 620.1, 631.3, 658.4, 674.2, 712.3, 725.1, 756.9, 773.5, 809.0, 840.7, 859.2, 871.8, 887.3, 898.2, 953.3, 971.5, 1052.5, 1072.0, 1121.0, 1155.5, 1201.8, 1223.0, 1230.8, 1268.8, 1289.7, 1309.9, 1342.5, 1381.1, 1410.7, 1427.7, 1524.1, 1548.8, 1588.0, 1596.4, 2873.1, 3087.5, 3094.6, 3104.1, 3118.5  |
| P2-c-1  | 0.5155<br>0.1428<br>0.1238 | 34.0, 37.9, 54.9, 82.2, 95.6, 128.4, 135.2, 157.3, 182.0, 192.2, 197.4, 219.7, 234.8, 256.8, 299.0, 316.7, 354.0, 360.2, 372.6, 417.7, 424.7, 449.6, 505.1, 541.0, 605.8, 630.7, 651.5, 685.2, 714.9, 731.1, 733.4, 752.7, 759.1, 796.7, 814.4, 842.6, 864.5, 899.2, 961.5, 968.3, 1048.2, 1077.2, 1129.2, 1161.0, 1206.3, 1231.6, 1251.1, 1276.0, 1298.8, 1360.9, 1376.9, 1378.5, 1419.6, 1446.5, 1461.7, 1553.8, 1591.8, 1669.3, 2847.6, 3059.1, 3104.8, 3120.2, 3133.7            |
| TS2-c-2 | 0.5781<br>0.1309<br>0.1159 | <b>429.1i</b> , 25.9, 36.1, 41.5, 59.4, 90.5, 108.2, 124.7, 161.6, 170.7, 198.2, 222.3, 256.0, 278.3, 308.3, 323.3, 331.4, 376.7, 383.9, 390.5, 419.0, 449.3, 501.3, 530.5, 552.4, 589.7, 630.4, 648.0, 690.6, 715.7, 734.9, 773.9, 782.3, 829.2, 842.9, 861.5, 882.4, 899.5, 930.2, 981.2, 1019.2,                                                                                                                                                                                  |

|         |                            |                                                                                                                                                                                                                                                                                                                                                                                                                                                                                        |
|---------|----------------------------|----------------------------------------------------------------------------------------------------------------------------------------------------------------------------------------------------------------------------------------------------------------------------------------------------------------------------------------------------------------------------------------------------------------------------------------------------------------------------------------|
|         |                            | 1060.4, 1092.7, 1124.2, 1185.5, 1194.9, 1209.2, 1259.2, 1274.3, 1299.0, 1335.9, 1368.7, 1388.7, 1430.4, 1537.3, 1555.7, 1576.5, 1684.2, 2876.4, 3000.7, 3081.6, 3103.6, 3120.4                                                                                                                                                                                                                                                                                                         |
| P2-c-2  | 0.5709<br>0.1324<br>0.1165 | 13.3, 39.0, 48.2, 54.4, 68.6, 96.7, 112.8, 127.0, 158.3, 178.1, 198.0, 245.7, 253.2, 270.8, 301.8, 322.1, 361.3, 367.9, 384.2, 417.8, 432.2, 484.2, 536.3, 543.4, 559.7, 622.7, 644.7, 662.4, 705.9, 722.6, 743.8, 772.5, 801.8, 837.1, 856.3, 873.3, 893.5, 926.3, 967.1, 1018.3, 1044.1, 1068.6, 1137.1, 1165.6, 1189.8, 1205.4, 1224.2, 1266.5, 1284.5, 1322.5, 1350.0, 1373.8, 1411.3, 1494.5, 1547.6, 1594.4, 1615.6, 1757.5, 2850.8, 3000.0, 3080.6, 3105.1, 3120.9              |
| TS2-d   | 0.6868<br>0.1266<br>0.1095 | <b>1630.1i</b> , 39.9, 48.0, 81.6, 101.0, 118.1, 165.4, 183.2, 193.8, 206.5, 232.9, 239.1, 254.7, 312.0, 333.1, 348.6, 381.5, 404.9, 426.6, 433.0, 486.9, 504.0, 567.1, 601.2, 619.7, 643.1, 661.3, 675.6, 684.2, 721.7, 752.5, 809.7, 840.2, 847.3, 861.5, 869.1, 893.6, 900.9, 986.5, 1017.6, 1060.0, 1074.2, 1090.4, 1127.8, 1149.7, 1174.8, 1206.5, 1226.5, 1264.6, 1273.6, 1301.7, 1339.7, 1384.4, 1427.5, 1465.3, 1546.3, 1582.4, 1593.3, 1858.5, 2976.7, 3102.8, 3104.4, 3118.8 |
| IM2-d   | 0.6705<br>0.1287<br>0.1090 | 39.1, 44.3, 75.5, 88.0, 125.6, 154.7, 178.9, 195.4, 206.0, 221.4, 235.8, 252.8, 270.5, 333.1, 336.0, 359.6, 383.1, 401.2, 428.2, 431.5, 492.3, 542.1, 567.3, 605.8, 624.7, 647.6, 656.5, 676.8, 700.5, 726.9, 774.8, 824.4, 838.9, 846.3, 866.4, 868.0, 926.5, 989.3, 1025.6, 1043.0, 1074.5, 1083.4, 1110.4, 1120.2, 1158.4, 1178.9, 1203.6, 1212.6, 1246.3, 1269.9, 1291.2, 1312.9, 1385.8, 1432.2, 1492.9, 1544.9, 1585.9, 1607.3, 2754.8, 2945.7, 3099.2, 3103.2, 3119.0           |
| TS2-d-1 | 0.6614<br>0.1288<br>0.1104 | <b>427.3i</b> , 39.0, 48.1, 68.0, 84.0, 134.0, 149.2, 187.1, 196.6, 204.1, 225.7, 244.5, 274.7, 310.9, 324.1, 348.0, 364.4, 384.0, 404.7, 426.8, 443.4, 508.5, 546.2, 567.7, 605.8, 631.8, 642.6, 667.0, 672.8, 711.8, 744.7, 787.9, 816.9, 835.6, 841.6, 866.2, 912.8, 937.2, 1001.1, 1031.1, 1044.7, 1078.9, 1087.5, 1114.4, 1149.8, 1198.2, 1210.8, 1269.5, 1277.5, 1281.6, 1333.7, 1378.0, 1419.4, 1429.5, 1449.8, 1532.8, 1554.5, 1587.8, 2750.0, 3059.6, 3097.8, 3104.8, 3120.8  |
| P2-d-1  | 0.6321<br>0.1177<br>0.1048 | 20.9, 39.7, 40.8, 65.4, 82.0, 114.8, 129.5, 181.2, 198.9, 201.7, 219.6, 223.8, 244.3, 303.5, 318.4, 334.4, 362.9, 373.4, 392.9, 411.3, 422.2, 506.5, 546.5, 577.9, 596.0, 634.1, 647.2, 651.4, 674.5, 723.0, 759.5, 775.7, 785.7, 804.7, 845.0, 857.9, 863.8, 909.0, 958.9, 1045.7, 1074.2, 1092.1, 1126.6, 1153.3, 1177.2, 1208.9, 1244.2, 1260.8, 1288.9, 1297.9, 1375.3, 1378.5, 1425.2, 1444.4, 1483.6, 1556.4, 1596.4, 1661.3, 2876.4, 3072.2, 3104.4, 3120.2, 3171.1             |
| TS2-d-2 | 0.6192<br>0.1295<br>0.1083 | <b>323.4i</b> , 39.0, 40.8, 62.8, 79.6, 107.2, 128.9, 152.3, 168.9, 195.2, 206.9, 218.0, 248.9, 255.3, 304.3, 316.6, 355.2, 368.0, 402.6, 426.5, 463.0, 490.3, 528.9, 547.6, 557.8, 616.7, 631.6, 650.1, 663.5, 706.0, 725.2, 769.2, 831.4, 838.2, 851.3, 865.8, 892.0, 928.7, 953.9, 972.4, 1026.6, 1080.8, 1118.5, 1169.7, 1197.5, 1207.1, 1226.0, 1272.9, 1286.8, 1324.2, 1325.9, 1392.1, 1426.9, 1476.6, 1541.3, 1569.8, 1583.0, 1599.5, 2825.9,                                   |

|        |                            |                                                                                                                                                                                                                                                                                                                                                                                                                                                                                      |
|--------|----------------------------|--------------------------------------------------------------------------------------------------------------------------------------------------------------------------------------------------------------------------------------------------------------------------------------------------------------------------------------------------------------------------------------------------------------------------------------------------------------------------------------|
|        |                            | 2970.7, 3095.2, 3101.5, 3119.4                                                                                                                                                                                                                                                                                                                                                                                                                                                       |
| P2-d-2 | 0.5937<br>0.1259<br>0.1073 | 20.8, 36.7, 45.6, 63.8, 81.1, 89.6, 109.5, 143.7, 171.5, 179.5, 196.5, 200.4, 224.2, 260.0, 290.6, 332.3, 354.5, 367.7, 394.9, 422.0, 470.5, 497.6, 508.8, 531.8, 554.6, 618.9, 625.1, 654.8, 664.7, 705.4, 720.9, 774.9, 819.6, 836.7, 853.5, 865.1, 880.6, 956.3, 985.5, 1010.6, 1021.0, 1082.8, 1097.8, 1145.0, 1207.4, 1212.2, 1215.2, 1257.7, 1276.7, 1318.0, 1349.9, 1378.5, 1437.3, 1553.9, 1571.5, 1589.9, 1617.9, 1750.5, 2828.4, 2973.9, 3078.2, 3101.6, 3118.6            |
| RC3    | 0.6846<br>0.1273<br>0.1113 | 37.7, 43.7, 49.2, 57.3, 98.3, 102.7, 113.1, 134.6, 145.6, 188.1, 198.2, 243.4, 246.1, 251.8, 252.5, 337.4, 371.1, 381.0, 387.4, 426.2, 430.6, 438.6, 453.0, 472.2, 576.3, 607.0, 621.5, 629.8, 655.7, 686.6, 692.9, 706.4, 715.7, 787.0, 834.7, 839.5, 857.9, 864.0, 902.1, 911.1, 1019.9, 1074.8, 1076.7, 1154.9, 1174.5, 1203.0, 1207.7, 1237.0, 1275.8, 1297.8, 1356.7, 1374.0, 1420.9, 1440.4, 1541.2, 1556.7, 1566.1, 1605.5, 3110.4, 3118.3, 3119.9, 3127.8, 3620.3            |
| TS3    | 0.7304<br>0.1223<br>0.1083 | <b>343.7i</b> , 41.8, 48.5, 85.9, 100.1, 118.3, 123.9, 144.3, 176.8, 188.9, 200.6, 228.1, 240.4, 248.9, 273.0, 339.5, 360.5, 373.6, 387.7, 412.7, 427.6, 440.0, 473.4, 575.9, 577.0, 619.1, 626.4, 651.2, 686.0, 690.3, 709.5, 711.7, 716.6, 784.1, 834.9, 840.0, 860.3, 865.7, 903.2, 913.1, 1021.3, 1047.9, 1075.8, 1152.0, 1173.0, 1200.9, 1204.3, 1227.5, 1274.1, 1281.8, 1345.1, 1381.0, 1415.3, 1429.3, 1497.8, 1549.6, 1566.8, 1597.0, 3104.2, 3105.2, 3118.7, 3129.0, 3635.3 |
| P3     | 0.5552<br>0.1327<br>0.1123 | 33.1, 43.3, 57.0, 60.6, 103.9, 123.4, 130.1, 162.9, 194.9, 223.5, 242.8, 262.2, 286.6, 293.1, 347.7, 362.7, 384.0, 399.2, 421.4, 429.7, 446.5, 475.0, 523.8, 592.7, 621.2, 648.3, 656.2, 671.8, 690.5, 704.6, 708.0, 750.3, 787.2, 838.6, 841.0, 861.1, 872.6, 907.7, 976.1, 1027.0, 1075.3, 1133.6, 1145.0, 1162.6, 1194.3, 1214.0, 1239.9, 1280.3, 1290.8, 1351.2, 1370.6, 1389.9, 1425.2, 1446.9, 1534.2, 1546.6, 1553.0, 1598.3, 3103.7, 3104.8, 3119.2, 3127.5, 3604.5          |
| RC4    | 0.6846<br>0.1273<br>0.1113 | 37.8, 43.6, 49.2, 57.3, 98.0, 102.5, 111.9, 134.8, 145.8, 188.1, 198.2, 243.4, 246.1, 251.8, 252.5, 337.4, 370.8, 381.2, 387.4, 426.2, 429.6, 438.6, 453.1, 472.2, 576.3, 606.4, 622.1, 629.8, 655.7, 686.7, 692.9, 706.6, 715.7, 787.0, 834.6, 839.5, 857.9, 864.0, 902.1, 911.1, 1019.8, 1074.8, 1076.7, 1154.9, 1174.5, 1203.0, 1207.7, 1237.0, 1275.8, 1297.8, 1356.7, 1374.0, 1420.9, 1440.4, 1541.1, 1556.7, 1566.0, 1605.4, 3110.3, 3118.3, 3119.9, 3127.7, 3619.6            |
| TS4    | 0.7312<br>0.1234<br>0.1091 | <b>401.5i</b> , 42.2, 46.9, 84.2, 98.7, 103.9, 129.1, 138.5, 178.6, 186.8, 198.3, 224.7, 251.7, 254.3, 261.7, 332.2, 349.0, 381.5, 388.1, 411.1, 427.6, 440.2, 471.9, 574.7, 585.8, 619.0, 623.2, 649.2, 683.5, 693.9, 705.9, 714.1, 759.2, 787.6, 833.8, 838.9, 854.8, 863.5, 901.7, 910.5, 1018.5, 1043.8, 1075.5, 1151.2, 1168.5, 1197.5, 1207.7, 1243.7, 1266.6, 1284.6, 1347.0, 1373.7, 1412.1, 1440.6, 1507.6, 1554.1, 1562.8, 1605.6, 3104.7, 3107.1, 3118.0, 3118.7, 3644.0  |

|         |                            |                                                                                                                                                                                                                                                                                                                                                                                                                                                                                                       |
|---------|----------------------------|-------------------------------------------------------------------------------------------------------------------------------------------------------------------------------------------------------------------------------------------------------------------------------------------------------------------------------------------------------------------------------------------------------------------------------------------------------------------------------------------------------|
| P4      | 0.6054<br>0.1358<br>0.1160 | 35.4, 42.5, 58.0, 64.1, 110.3, 131.4, 136.2, 153.8, 193.1, 221.5, 253.6,<br>257.9, 273.0, 281.9, 368.2, 375.2, 389.9, 409.1, 425.5, 436.2, 454.0,<br>461.5, 515.8, 591.7, 618.3, 640.4, 651.6, 670.8, 696.0, 706.1, 711.6,<br>747.3, 803.3, 838.1, 852.4, 862.5, 872.2, 905.2, 949.4, 1029.2, 1074.7,<br>1133.3, 1149.6, 1172.6, 1204.7, 1213.5, 1221.9, 1271.0, 1283.2, 1357.1,<br>1369.2, 1384.0, 1430.0, 1454.3, 1513.4, 1548.6, 1550.6, 1596.3, 3109.8,<br>3116.2, 3117.4, 3119.4, 3595.3         |
| RC5     | 0.6848<br>0.1273<br>0.1113 | 38.3, 43.6, 48.9, 57.3, 97.6, 102.6, 109.1, 134.6, 145.6, 188.0, 198.2,<br>243.2, 246.0, 251.8, 252.6, 337.4, 370.8, 381.5, 387.1, 426.2, 429.6,<br>438.6, 452.9, 472.1, 576.2, 606.3, 622.0, 629.8, 655.7, 686.6, 692.8,<br>706.7, 715.6, 787.0, 834.6, 839.5, 857.9, 864.0, 902.0, 911.1, 1019.8,<br>1074.8, 1076.7, 1154.9, 1174.5, 1203.0, 1207.6, 1237.3, 1276.2, 1299.5,<br>1356.7, 1373.8, 1420.9, 1440.3, 1541.2, 1556.9, 1565.2, 1605.4, 3110.3,<br>3118.3, 3119.9, 3127.8, 3620.4           |
| TS5     | 0.6988<br>0.1277<br>0.1111 | <b>218.1i</b> , 40.6, 49.8, 74.2, 78.8, 100.0, 115.9, 126.2, 138.8, 188.4, 198.7,<br>233.3, 245.9, 251.8, 253.9, 336.4, 373.9, 380.7, 387.8, 426.3, 437.6,<br>443.5, 473.8, 576.2, 615.1, 622.7, 628.5, 649.9, 674.3, 686.4, 697.3,<br>713.7, 718.3, 786.2, 837.8, 843.3, 864.8, 898.0, 905.5, 914.9, 1020.3,<br>1072.1, 1075.2, 1149.9, 1169.7, 1196.3, 1205.3, 1228.9, 1273.2, 1297.3,<br>1336.1, 1370.4, 1416.8, 1437.3, 1523.6, 1547.0, 1553.7, 1598.8, 3111.5,<br>3119.0, 3119.7, 3132.8, 3639.9 |
| IM5     | 0.7195<br>0.1280<br>0.1098 | 34.8, 50.9, 65.2, 92.5, 128.6, 142.1, 187.1, 197.0, 201.6, 236.7, 243.5,<br>254.5, 266.0, 316.3, 345.9, 368.0, 377.6, 389.9, 424.6, 431.9, 462.4,<br>493.5, 560.4, 589.3, 615.4, 634.6, 639.7, 673.7, 692.5, 710.3, 714.9,<br>737.8, 777.0, 836.7, 859.2, 869.7, 902.7, 948.3, 1004.8, 1028.8, 1071.6,<br>1103.4, 1142.4, 1169.1, 1190.9, 1195.8, 1207.4, 1252.5, 1283.7, 1317.2,<br>1331.1, 1356.5, 1397.1, 1419.9, 1463.5, 1509.0, 1543.5, 1582.0, 2923.1,<br>3112.0, 3117.9, 3131.0, 3676.9        |
| TS5-a   | 0.6739<br>0.1209<br>0.1097 | <b>305.2i</b> , 32.7, 39.9, 50.7, 99.7, 120.4, 125.8, 157.5, 168.5, 193.8, 203.5,<br>243.7, 252.2, 280.5, 313.5, 326.1, 377.2, 389.9, 409.3, 423.1, 433.4,<br>466.8, 481.6, 522.8, 560.8, 625.1, 629.2, 639.9, 661.5, 702.2, 713.5,<br>717.7, 836.2, 840.8, 858.9, 870.6, 878.7, 895.2, 928.8, 962.0, 1020.4,<br>1071.6, 1115.5, 1143.9, 1169.5, 1203.0, 1223.6, 1247.8, 1280.6, 1294.7,<br>1339.2, 1379.2, 1406.8, 1473.3, 1496.4, 1527.1, 1534.8, 1579.2, 3095.8,<br>3108.5, 3112.6, 3118.8, 3646.4 |
| IM5-a   | 0.6598<br>0.1137<br>0.1039 | 25.8, 28.2, 39.7, 52.4, 110.5, 118.3, 122.1, 158.5, 167.9, 194.2, 231.9,<br>250.3, 254.2, 272.8, 300.1, 319.0, 375.0, 385.7, 411.6, 419.8, 437.5,<br>476.3, 514.7, 525.6, 559.2, 608.2, 627.4, 639.7, 684.6, 699.2, 709.8,<br>718.3, 838.6, 854.2, 856.9, 866.4, 875.4, 906.4, 936.2, 953.3, 1012.0,<br>1072.3, 1102.7, 1140.2, 1173.7, 1204.6, 1229.3, 1253.2, 1285.0, 1311.1,<br>1358.5, 1381.3, 1408.3, 1530.4, 1537.1, 1581.3, 1584.2, 1606.6, 3089.8,<br>3111.4, 3113.0, 3115.2, 3641.3          |
| TS5-a-1 | 0.7116                     | <b>361.9i</b> , 26.5, 35.5, 51.8, 89.2, 118.7, 132.2, 153.4, 185.7, 195.6, 202.7,                                                                                                                                                                                                                                                                                                                                                                                                                     |

|         |                            |                                                                                                                                                                                                                                                                                                                                                                                                                                                                                     |
|---------|----------------------------|-------------------------------------------------------------------------------------------------------------------------------------------------------------------------------------------------------------------------------------------------------------------------------------------------------------------------------------------------------------------------------------------------------------------------------------------------------------------------------------|
|         | 0.1086<br>0.0980           | 240.1, 258.0, 277.0, 293.8, 324.0, 355.2, 381.6, 394.9, 412.7, 422.4, 444.9, 485.3, 524.5, 588.8, 615.8, 629.7, 639.7, 675.7, 699.9, 709.6, 716.3, 839.9, 845.3, 857.2, 861.7, 876.9, 896.7, 923.3, 948.8, 1001.6, 1070.5, 1083.2, 1167.3, 1178.5, 1202.7, 1220.9, 1269.6, 1280.4, 1334.8, 1372.9, 1379.3, 1407.5, 1484.2, 1534.4, 1542.7, 1579.8, 1583.8, 3076.4, 3090.0, 3111.2, 3113.7, 3190.9                                                                                   |
| P5-a-1  | 0.7322<br>0.1079<br>0.0991 | 25.4, 32.7, 40.1, 74.1, 104.4, 111.5, 144.4, 160.2, 187.9, 198.5, 211.7, 230.4, 250.9, 281.0, 291.3, 332.2, 361.6, 375.5, 392.0, 421.5, 426.0, 490.2, 530.3, 547.3, 607.4, 623.7, 635.9, 671.9, 710.6, 712.3, 721.0, 777.6, 797.8, 840.6, 846.1, 858.8, 890.2, 927.0, 942.9, 960.4, 992.4, 1072.9, 1132.8, 1139.6, 1178.0, 1203.9, 1215.6, 1259.3, 1289.1, 1346.8, 1377.9, 1399.9, 1417.5, 1427.6, 1481.3, 1543.0, 1575.9, 1673.7, 2855.7, 3082.0, 3107.6, 3119.2, 3166.2           |
| TS5-a-2 | 0.6486<br>0.1290<br>0.1174 | <b>317.4i</b> , 26.9, 38.3, 70.0, 103.5, 115.7, 129.5, 147.1, 156.2, 177.1, 195.7, 244.2, 266.8, 275.4, 297.1, 308.9, 348.2, 374.4, 404.1, 420.2, 426.1, 443.9, 500.9, 513.3, 549.6, 621.9, 634.3, 637.8, 673.7, 694.7, 706.4, 718.8, 800.0, 837.2, 845.8, 856.8, 861.7, 874.9, 925.0, 950.0, 996.9, 1070.5, 1123.4, 1151.7, 1166.6, 1201.5, 1214.5, 1262.9, 1281.6, 1310.8, 1334.4, 1374.8, 1404.8, 1490.1, 1519.7, 1535.4, 1574.3, 1581.5, 3108.5, 3111.9, 3118.1, 3125.6, 3624.6 |
| P5-a-2  | 0.5726<br>0.1436<br>0.1200 | 33.5, 41.8, 53.0, 88.9, 102.2, 128.7, 153.8, 182.9, 193.7, 228.4, 233.9, 249.1, 289.6, 322.4, 347.2, 359.2, 378.6, 413.8, 424.1, 437.7, 445.2, 461.2, 563.6, 585.6, 608.5, 628.0, 636.9, 666.7, 681.3, 699.5, 704.3, 723.4, 727.3, 796.4, 836.5, 860.4, 862.8, 898.7, 993.0, 1048.9, 1072.1, 1073.9, 1112.9, 1158.4, 1190.5, 1205.9, 1221.2, 1242.8, 1288.5, 1301.4, 1357.8, 1381.7, 1395.0, 1417.9, 1437.5, 1541.3, 1582.3, 1596.1, 3054.6, 3108.7, 3118.5, 3168.3, 3659.7         |
| TS5-b   | 0.6529<br>0.1193<br>0.1025 | <b>94.6i</b> , 31.7, 36.9, 57.1, 108.0, 109.5, 127.8, 155.4, 166.4, 192.0, 196.1, 221.6, 261.4, 271.7, 288.6, 337.5, 361.3, 376.4, 397.6, 422.1, 454.1, 481.2, 511.4, 515.4, 545.8, 613.9, 628.7, 633.3, 643.5, 673.2, 693.6, 718.2, 741.5, 775.6, 807.0, 829.0, 831.7, 848.2, 914.1, 987.2, 1068.4, 1089.0, 1121.2, 1129.4, 1166.7, 1208.0, 1227.0, 1265.7, 1287.3, 1332.3, 1366.2, 1381.1, 1433.8, 1470.0, 1546.7, 1552.6, 1574.3, 1597.8, 3098.8, 3099.1, 3118.1, 3141.5, 3686.2 |
| IM5-b   | 0.6684<br>0.1137<br>0.0978 | 18.3, 25.2, 53.3, 60.7, 102.9, 123.8, 136.0, 148.6, 155.1, 183.6, 191.6, 218.5, 226.4, 255.3, 270.3, 321.3, 363.5, 387.0, 394.7, 423.4, 453.2, 490.2, 493.0, 504.1, 555.9, 609.0, 625.1, 636.6, 642.3, 683.1, 695.8, 708.9, 765.9, 778.6, 812.4, 817.9, 844.1, 861.6, 915.2, 977.0, 1066.7, 1088.9, 1109.9, 1124.9, 1166.8, 1213.1, 1232.4, 1268.4, 1291.5, 1335.2, 1366.0, 1377.1, 1442.8, 1546.4, 1557.1, 1590.2, 1608.8, 1623.1, 3069.7, 3089.9, 3090.6, 3118.1, 3694.9          |
| TS5-b-1 | 0.5739<br>0.1443<br>0.1280 | <b>304.3i</b> , 36.4, 49.6, 69.6, 81.7, 112.5, 134.1, 142.9, 181.5, 184.7, 198.3, 210.3, 238.7, 274.1, 292.3, 304.0, 360.3, 370.9, 397.8, 431.8, 465.3, 481.3, 508.8, 517.6, 545.2, 600.1, 617.9, 632.6, 644.2, 673.2, 697.7,                                                                                                                                                                                                                                                       |

|         |                            |                                                                                                                                                                                                                                                                                                                                                                                                                                                                                       |
|---------|----------------------------|---------------------------------------------------------------------------------------------------------------------------------------------------------------------------------------------------------------------------------------------------------------------------------------------------------------------------------------------------------------------------------------------------------------------------------------------------------------------------------------|
|         |                            | 731.7, 754.6, 793.6, 817.8, 822.3, 846.0, 872.0, 905.4, 973.5, 1050.9, 1071.9, 1084.9, 1124.2, 1165.0, 1185.2, 1210.7, 1262.4, 1279.0, 1293.0, 1334.3, 1362.5, 1429.5, 1480.1, 1494.4, 1549.2, 1584.4, 1641.2, 3088.1, 3115.1, 3117.6, 3122.0, 3620.9                                                                                                                                                                                                                                 |
| P5-b-1  | 0.5680<br>0.1605<br>0.1430 | 39.2, 52.4, 73.1, 76.4, 101.6, 144.3, 161.5, 179.7, 193.1, 194.9, 218.3, 230.5, 282.3, 288.0, 325.1, 353.3, 379.3, 407.3, 428.9, 443.4, 450.8, 494.1, 507.9, 576.3, 610.5, 623.1, 629.0, 645.4, 651.9, 698.0, 705.4, 745.0, 770.0, 811.9, 849.5, 883.8, 889.6, 920.2, 972.3, 995.6, 1051.6, 1069.6, 1083.8, 1120.5, 1157.9, 1181.9, 1204.6, 1212.4, 1243.3, 1270.1, 1284.0, 1347.5, 1357.3, 1431.8, 1507.4, 1549.8, 1584.1, 1638.4, 3089.5, 3095.9, 3119.4, 3144.3, 3638.7            |
| TS5-c   | 0.7033<br>0.1285<br>0.1118 | <b>1508.5i</b> , 37.9, 50.3, 79.8, 96.4, 125.9, 162.4, 183.4, 194.7, 207.4, 228.5, 238.1, 268.4, 291.8, 337.0, 369.1, 383.5, 407.1, 426.0, 429.2, 485.4, 495.9, 569.2, 601.8, 614.8, 639.8, 657.8, 673.9, 699.4, 703.1, 729.4, 813.5, 820.4, 846.0, 872.7, 878.3, 897.5, 902.6, 951.2, 1018.2, 1044.0, 1075.5, 1091.6, 1127.3, 1144.4, 1188.1, 1203.2, 1215.2, 1262.2, 1272.5, 1311.2, 1353.2, 1379.5, 1432.9, 1469.2, 1552.2, 1581.3, 1613.9, 1887.2, 2956.2, 3106.2, 3118.7, 3121.8 |
| IM5-c   | 0.7165<br>0.1302<br>0.1111 | 38.4, 46.7, 75.8, 87.0, 135.6, 152.9, 180.9, 194.8, 208.8, 220.3, 240.4, 255.5, 278.8, 318.5, 355.6, 363.5, 378.1, 416.0, 423.2, 431.9, 484.5, 545.7, 560.8, 609.1, 621.4, 643.3, 659.9, 673.8, 695.3, 722.9, 761.6, 823.5, 838.7, 841.0, 853.2, 884.2, 902.4, 935.1, 1031.5, 1072.2, 1079.4, 1091.8, 1120.4, 1128.5, 1186.5, 1190.4, 1195.7, 1202.9, 1215.3, 1237.8, 1277.7, 1316.1, 1369.3, 1434.2, 1491.2, 1557.9, 1583.8, 1631.2, 2744.3, 2936.2, 3114.2, 3115.9, 3120.1          |
| TS5-c-1 | 0.7142<br>0.1294<br>0.1113 | <b>406.4i</b> , 40.3, 48.8, 68.1, 87.8, 136.7, 160.6, 184.2, 197.7, 206.0, 224.9, 250.2, 263.3, 300.1, 312.7, 362.3, 373.8, 393.5, 413.7, 433.2, 440.6, 509.0, 544.4, 583.3, 619.4, 635.7, 647.8, 661.7, 693.0, 704.2, 724.1, 808.9, 826.1, 837.4, 843.0, 876.7, 897.2, 928.5, 1005.1, 1013.8, 1068.9, 1076.6, 1094.9, 1131.6, 1185.3, 1190.1, 1213.0, 1216.4, 1268.6, 1277.6, 1311.0, 1368.2, 1380.0, 1425.2, 1457.8, 1543.5, 1560.6, 1601.4, 2745.4, 3030.6, 3113.4, 3114.7, 3119.5 |
| P5-c-1  | 0.6721<br>0.1088<br>0.0982 | 27.1, 32.7, 41.3, 68.3, 94.0, 113.0, 130.1, 182.9, 199.5, 202.9, 221.8, 225.6, 257.5, 293.7, 307.7, 338.1, 365.6, 376.9, 386.6, 414.7, 425.9, 503.4, 548.8, 599.2, 619.4, 623.8, 645.5, 654.1, 705.0, 710.4, 714.5, 773.3, 786.7, 836.8, 839.4, 847.0, 859.1, 924.6, 945.1, 964.9, 1070.3, 1079.3, 1127.6, 1141.9, 1163.2, 1202.0, 1213.8, 1254.9, 1288.2, 1327.8, 1372.5, 1396.2, 1417.4, 1421.1, 1472.1, 1543.8, 1575.7, 1678.7, 2877.0, 3085.7, 3108.0, 3118.9, 3155.9             |
| TS5-c-2 | 0.6944<br>0.1266<br>0.1083 | <b>379.2i</b> , 34.7, 46.2, 64.5, 79.1, 118.9, 132.8, 151.6, 168.7, 194.4, 207.1, 220.9, 239.9, 252.3, 300.2, 326.9, 361.9, 373.5, 418.8, 433.1, 454.3, 490.0, 538.7, 548.1, 550.6, 617.8, 632.7, 652.5, 683.8, 693.9, 717.5, 782.1, 830.4, 831.2, 842.8, 877.2, 886.1, 919.7, 943.2, 984.1, 1077.9,                                                                                                                                                                                  |

|         |                            |                                                                                                                                                                                                                                                                                                                                                                                                                                                                                      |
|---------|----------------------------|--------------------------------------------------------------------------------------------------------------------------------------------------------------------------------------------------------------------------------------------------------------------------------------------------------------------------------------------------------------------------------------------------------------------------------------------------------------------------------------|
|         |                            | 1089.3, 1125.2, 1178.5, 1182.6, 1196.9, 1203.8, 1216.0, 1278.1, 1313.4, 1327.0, 1366.7, 1434.7, 1488.0, 1555.9, 1564.8, 1587.0, 1622.6, 2822.3, 2943.6, 3108.0, 3115.4, 3119.3                                                                                                                                                                                                                                                                                                       |
| P5-c-2  | 0.6760<br>0.1183<br>0.1033 | 9.0, 29.5, 47.0, 55.6, 62.0, 104.0, 118.3, 137.5, 160.3, 173.9, 188.5, 200.8, 217.4, 262.9, 266.6, 307.5, 352.3, 382.1, 404.4, 430.8, 451.8, 494.8, 514.9, 539.6, 562.5, 614.9, 627.1, 674.8, 676.6, 696.1, 709.8, 793.4, 817.1, 838.4, 842.1, 876.5, 885.4, 920.7, 979.1, 1000.9, 1077.9, 1081.8, 1113.9, 1144.5, 1178.6, 1202.2, 1216.1, 1222.4, 1280.3, 1318.0, 1348.7, 1364.6, 1442.5, 1565.3, 1586.9, 1621.5, 1658.1, 1744.3, 2829.6, 2946.2, 3097.0, 3104.0, 3118.9            |
| TS5-d   | 0.7193<br>0.1262<br>0.1107 | <b>1774.5i</b> , 37.1, 46.6, 79.8, 98.0, 130.3, 148.6, 176.5, 192.7, 214.3, 241.2, 252.7, 256.6, 291.2, 324.8, 381.3, 396.8, 408.3, 426.1, 446.6, 480.9, 513.6, 573.0, 577.9, 621.6, 642.5, 660.5, 698.7, 713.0, 724.1, 769.3, 785.8, 839.8, 849.9, 858.9, 871.2, 888.5, 897.5, 951.7, 999.9, 1016.2, 1072.6, 1107.9, 1145.1, 1171.9, 1194.7, 1206.5, 1227.9, 1258.6, 1288.3, 1327.4, 1360.9, 1396.7, 1428.5, 1495.5, 1545.2, 1568.8, 1591.9, 1892.2, 2975.6, 3107.0, 3111.7, 3117.8 |
| IM5-d   | 0.7075<br>0.1312<br>0.1197 | 36.6, 45.5, 69.4, 107.1, 122.5, 136.7, 152.6, 177.0, 195.2, 230.6, 254.5, 257.3, 281.1, 329.7, 360.1, 382.5, 417.5, 423.2, 430.6, 449.2, 507.7, 538.2, 561.7, 624.6, 642.8, 652.8, 681.5, 711.8, 717.0, 748.3, 753.6, 842.0, 854.8, 860.0, 864.8, 884.5, 922.8, 994.9, 1013.9, 1050.2, 1072.4, 1128.0, 1151.1, 1173.8, 1192.6, 1207.1, 1213.4, 1249.3, 1270.7, 1293.6, 1333.6, 1361.5, 1388.2, 1427.5, 1503.9, 1551.3, 1576.0, 1595.3, 2904.0, 3033.8, 3110.3, 3114.5, 3118.5        |
| TS5-d-1 | 0.6643<br>0.1233<br>0.1129 | <b>147.6i</b> , 29.5, 36.7, 52.8, 105.5, 110.1, 119.9, 152.3, 167.4, 194.8, 209.7, 241.3, 275.9, 283.6, 305.3, 333.2, 373.2, 378.1, 396.7, 418.0, 422.8, 502.7, 513.9, 540.2, 600.8, 626.9, 641.2, 678.0, 700.1, 709.8, 748.1, 770.8, 832.2, 840.1, 856.1, 867.4, 889.1, 902.7, 951.2, 974.1, 1033.0, 1072.0, 1122.4, 1166.2, 1183.0, 1203.5, 1218.1, 1262.2, 1284.5, 1299.2, 1325.7, 1379.8, 1406.2, 1525.7, 1540.3, 1581.8, 1597.3, 1618.1, 2854.7, 3006.4, 3101.5, 3111.4, 3113.6 |
| P5-d-1  | 0.6478<br>0.1209<br>0.1100 | 21.5, 32.9, 45.0, 49.7, 69.1, 110.0, 113.5, 129.3, 158.7, 173.5, 198.3, 245.6, 255.9, 272.5, 299.2, 329.7, 355.7, 374.6, 396.3, 420.1, 426.6, 483.8, 532.7, 544.8, 602.4, 628.8, 641.0, 691.7, 699.8, 710.3, 732.5, 778.3, 839.5, 856.0, 857.9, 868.9, 893.2, 939.5, 962.0, 975.3, 1028.8, 1072.6, 1102.9, 1174.3, 1190.1, 1205.0, 1229.6, 1264.1, 1285.4, 1310.9, 1347.9, 1381.5, 1408.4, 1533.3, 1538.4, 1582.6, 1608.2, 1757.8, 2853.6, 2999.4, 3094.8, 3111.5, 3113.5            |
| TS5-d-2 | 0.6783<br>0.1298<br>0.1194 | <b>444.0i</b> , 30.7, 39.4, 59.3, 104.2, 116.2, 131.6, 144.7, 170.5, 193.7, 232.8, 249.0, 259.9, 280.8, 314.7, 325.7, 377.5, 410.8, 416.7, 425.1, 461.6, 483.0, 530.2, 564.0, 625.4, 633.6, 643.0, 701.9, 710.3, 722.8, 734.9, 781.4, 816.0, 841.2, 857.6, 864.5, 890.6, 901.8, 958.2, 965.1, 1059.5,                                                                                                                                                                                |

|        |                            |                                                                                                                                                                                                                                                                                                                                                                                                                                                                                      |
|--------|----------------------------|--------------------------------------------------------------------------------------------------------------------------------------------------------------------------------------------------------------------------------------------------------------------------------------------------------------------------------------------------------------------------------------------------------------------------------------------------------------------------------------|
|        |                            | 1074.6, 1110.7, 1156.3, 1197.9, 1214.3, 1247.4, 1269.5, 1288.5, 1301.5, 1344.4, 1376.9, 1401.4, 1421.3, 1536.6, 1546.5, 1583.2, 1591.2, 2858.9, 3086.8, 3106.3, 3107.1, 3117.4                                                                                                                                                                                                                                                                                                       |
| P5-d-2 | 0.6515<br>0.1253<br>0.1152 | 29.8, 37.6, 55.3, 88.5, 95.0, 111.6, 142.0, 146.7, 180.0, 197.5, 198.2, 207.2, 240.9, 254.7, 295.0, 328.8, 338.4, 365.7, 375.0, 416.4, 424.0, 460.6, 501.4, 541.5, 617.6, 635.7, 647.8, 708.9, 713.7, 718.0, 739.0, 755.5, 768.0, 793.5, 827.6, 837.8, 855.3, 900.6, 962.8, 978.6, 1051.6, 1072.3, 1082.2, 1165.1, 1203.2, 1231.5, 1263.3, 1276.8, 1294.8, 1367.6, 1387.5, 1406.8, 1437.2, 1447.4, 1489.4, 1541.2, 1577.4, 1669.2, 2822.9, 3067.5, 3109.3, 3119.5, 3132.5            |
| RC6    | 0.6847<br>0.1273<br>0.1113 | 37.7, 43.5, 49.2, 57.4, 97.6, 102.4, 109.5, 134.6, 145.7, 188.1, 198.2, 243.4, 246.1, 251.8, 252.5, 337.4, 370.9, 381.2, 387.4, 426.2, 429.4, 438.6, 452.6, 472.3, 576.3, 606.4, 622.0, 629.7, 655.7, 686.7, 692.9, 706.6, 715.8, 787.0, 834.5, 839.5, 857.9, 864.0, 902.0, 911.1, 1019.9, 1074.8, 1076.7, 1154.9, 1174.5, 1203.0, 1207.7, 1237.0, 1275.7, 1297.8, 1356.7, 1373.9, 1420.9, 1440.3, 1541.1, 1556.6, 1566.0, 1605.5, 3110.3, 3118.3, 3119.9, 3127.7, 3620.3            |
| TS6    | 0.7156<br>0.1289<br>0.1142 | <b>423.5i</b> , 42.8, 50.4, 76.9, 111.7, 118.5, 141.8, 177.2, 189.0, 199.4, 206.9, 229.2, 245.9, 250.0, 262.5, 336.0, 349.9, 381.4, 390.1, 411.5, 432.6, 444.8, 472.6, 574.2, 605.4, 626.4, 628.6, 650.4, 666.3, 681.5, 708.7, 724.4, 769.1, 820.7, 831.8, 843.6, 845.7, 871.7, 899.0, 910.3, 1018.4, 1065.3, 1076.3, 1141.6, 1169.5, 1200.3, 1203.9, 1227.0, 1261.7, 1281.8, 1349.3, 1368.0, 1406.1, 1435.7, 1483.9, 1543.7, 1565.6, 1610.2, 3109.7, 3114.7, 3118.7, 3120.0, 3642.2 |
| IM6    | 0.6876<br>0.1315<br>0.1169 | 35.5, 44.9, 72.0, 120.3, 132.9, 168.8, 186.5, 196.5, 213.7, 217.2, 244.5, 255.2, 282.8, 305.5, 341.2, 351.6, 371.8, 395.4, 419.5, 435.0, 469.4, 476.6, 572.3, 575.4, 615.8, 619.1, 631.0, 643.1, 673.2, 696.5, 724.0, 740.2, 770.0, 822.0, 843.5, 859.6, 881.6, 885.5, 906.5, 987.4, 1041.5, 1076.0, 1102.2, 1116.5, 1178.2, 1188.2, 1201.9, 1216.4, 1258.8, 1280.1, 1298.3, 1337.8, 1368.2, 1436.6, 1453.5, 1540.2, 1569.8, 1608.0, 3104.3, 3105.5, 3106.4, 3119.7, 3665.6          |
| TS6-a  | 0.5602<br>0.1397<br>0.1258 | <b>188.8i</b> , 24.4, 43.4, 57.1, 115.5, 140.9, 152.3, 176.2, 191.0, 206.3, 226.6, 242.7, 262.9, 286.4, 304.8, 336.3, 345.3, 386.0, 409.2, 416.1, 439.8, 450.8, 481.6, 517.6, 526.3, 548.0, 596.6, 628.5, 638.5, 664.1, 680.1, 720.4, 732.5, 750.7, 810.8, 848.3, 881.5, 886.9, 910.3, 986.1, 1035.4, 1056.5, 1095.8, 1124.1, 1145.7, 1187.7, 1219.2, 1224.5, 1258.8, 1279.0, 1325.2, 1393.8, 1442.8, 1445.9, 1522.4, 1537.7, 1574.4, 1665.9, 2966.8, 3030.9, 3110.0, 3116.7, 3671.6 |
| IM6-a  | 0.5497<br>0.1412<br>0.1264 | 27.1, 42.3, 58.7, 95.2, 116.3, 140.7, 151.0, 189.2, 193.5, 205.1, 234.5, 242.0, 270.5, 288.1, 319.7, 332.5, 351.5, 371.2, 400.4, 416.3, 436.7, 450.1, 479.9, 517.3, 532.8, 552.8, 610.1, 626.0, 631.3, 668.7, 680.3, 719.3, 728.7, 737.8, 809.5, 850.2, 879.6, 885.3, 902.6, 984.6, 1043.2,                                                                                                                                                                                          |



|         |                            |                                                                                                                                                                                                                                                                                                                                                                                                                                                                                    |
|---------|----------------------------|------------------------------------------------------------------------------------------------------------------------------------------------------------------------------------------------------------------------------------------------------------------------------------------------------------------------------------------------------------------------------------------------------------------------------------------------------------------------------------|
|         |                            | 1062.2, 1099.4, 1128.5, 1137.4, 1180.8, 1219.6, 1230.9, 1256.4, 1268.5, 1324.2, 1403.6, 1445.2, 1517.5, 1525.1, 1574.9, 1588.9, 1709.6, 2956.2, 3033.2, 3114.5, 3116.3, 3673.8                                                                                                                                                                                                                                                                                                     |
| TS6-a-1 | 0.4288<br>0.1716<br>0.1624 | <b>513.8i</b> , 25.8, 32.4, 54.8, 87.8, 91.6, 114.4, 146.5, 167.7, 177.0, 194.3, 200.4, 255.6, 275.2, 294.7, 327.2, 336.9, 369.1, 394.5, 408.4, 418.2, 439.8, 444.3, 463.2, 493.8, 525.6, 553.7, 573.4, 620.7, 626.0, 655.1, 673.3, 679.8, 694.6, 773.0, 804.6, 829.8, 857.0, 872.5, 962.0, 983.8, 1040.1, 1079.8, 1103.0, 1139.2, 1186.4, 1207.4, 1208.7, 1236.7, 1284.2, 1308.4, 1368.4, 1418.3, 1493.8, 1584.7, 1592.3, 1643.3, 1815.3, 3003.3, 3078.4, 3099.4, 3100.9, 3680.3  |
| P6-a-1  | 0.4122<br>0.1689<br>0.1484 | 16.5, 25.3, 32.7, 45.1, 70.9, 90.6, 113.4, 141.8, 145.3, 170.6, 193.0, 197.8, 254.7, 270.2, 276.6, 302.1, 335.8, 375.4, 397.1, 409.4, 425.1, 428.0, 435.9, 467.3, 494.6, 509.7, 514.4, 587.7, 592.7, 617.1, 637.1, 653.9, 688.6, 693.9, 771.1, 811.3, 831.4, 881.0, 884.0, 976.6, 987.5, 1068.5, 1093.2, 1111.3, 1152.7, 1175.0, 1209.4, 1226.2, 1240.1, 1303.0, 1371.4, 1386.3, 1417.9, 1487.1, 1549.6, 1568.3, 1602.3, 2121.1, 3006.3, 3081.3, 3087.4, 3111.0, 3700.6            |
| TS6-b   | 0.7112<br>0.1197<br>0.1118 | <b>365.3i</b> , 30.1, 42.6, 64.1, 78.4, 132.7, 165.5, 188.5, 194.8, 201.7, 227.0, 239.7, 263.9, 275.5, 278.9, 307.0, 330.3, 386.6, 394.0, 396.2, 423.8, 449.1, 457.8, 517.2, 580.2, 590.9, 602.0, 624.8, 628.6, 647.9, 683.6, 705.5, 716.8, 752.0, 786.1, 798.3, 844.6, 872.4, 880.4, 906.1, 955.2, 1040.1, 1070.8, 1104.8, 1135.3, 1199.4, 1218.7, 1224.6, 1280.4, 1297.7, 1350.7, 1377.6, 1429.4, 1446.6, 1476.5, 1534.4, 1563.5, 1596.1, 3082.9, 3112.7, 3118.7, 3144.3, 3676.6 |
| IM6-b   | 0.7398<br>0.1114<br>0.0990 | 18.9, 34.7, 44.2, 76.8, 99.1, 131.0, 152.5, 169.5, 192.0, 203.4, 217.8, 227.6, 251.7, 282.6, 298.4, 335.1, 361.9, 395.9, 411.8, 418.8, 431.6, 442.6, 477.2, 523.3, 579.0, 607.7, 622.7, 627.7, 647.7, 658.5, 663.0, 709.2, 714.5, 724.0, 765.0, 817.7, 843.3, 866.6, 889.3, 900.2, 944.9, 1017.4, 1071.7, 1090.0, 1153.9, 1201.9, 1234.2, 1256.7, 1299.8, 1326.0, 1361.9, 1412.0, 1451.4, 1541.2, 1562.6, 1571.6, 1594.0, 1613.3, 3070.3, 3113.1, 3118.0, 3178.0, 3544.0           |
| TS6-b-1 | 0.7844<br>0.1072<br>0.0954 | <b>174.7i</b> , 18.4, 37.1, 74.2, 77.4, 128.7, 154.6, 189.9, 193.8, 205.0, 214.1, 220.0, 255.1, 290.6, 298.3, 346.0, 369.2, 408.2, 414.2, 432.2, 443.7, 467.0, 524.5, 526.9, 589.6, 607.5, 618.9, 633.1, 653.2, 660.9, 701.1, 714.9, 717.9, 765.9, 783.6, 837.3, 841.2, 870.0, 893.3, 906.3, 952.7, 1041.0, 1072.9, 1084.3, 1161.0, 1201.5, 1235.2, 1280.6, 1333.3, 1351.3, 1368.3, 1399.9, 1445.2, 1466.5, 1535.6, 1547.5, 1563.5, 1592.5, 2614.2, 3068.0, 3113.3, 3114.9, 3118.7 |
| P6-b-1  | 0.7419<br>0.1135<br>0.1011 | 23.5, 31.9, 34.8, 71.4, 96.2, 115.4, 136.0, 169.9, 181.5, 194.3, 218.2, 220.7, 246.9, 285.3, 304.3, 351.1, 370.7, 402.1, 422.0, 426.1, 452.2, 494.1, 532.2, 587.1, 608.2, 612.4, 633.5, 665.8, 675.8, 679.8, 691.0, 732.8, 749.9, 799.1, 843.5, 864.2, 886.2, 900.5, 903.7, 933.5, 974.3, 1070.3, 1102.3, 1133.7, 1147.8, 1193.5, 1209.1, 1266.3, 1293.1, 1344.0, 1378.8, 1395.2, 1422.1, 1456.3, 1570.1, 1594.3, 1602.9, 1636.0,                                                  |

|         |                            |                                                                                                                                                                                                                                                                                                                                                                                                                                                                                       |
|---------|----------------------------|---------------------------------------------------------------------------------------------------------------------------------------------------------------------------------------------------------------------------------------------------------------------------------------------------------------------------------------------------------------------------------------------------------------------------------------------------------------------------------------|
|         |                            | 3059.0, 3063.1, 3105.6, 3117.2, 3151.7                                                                                                                                                                                                                                                                                                                                                                                                                                                |
| TS6-c   | 0.6445<br>0.1351<br>0.1212 | <b>1716.9i</b> , 35.6, 42.9, 65.1, 118.2, 143.6, 181.6, 192.1, 201.1, 214.9, 246.1, 257.2, 277.1, 317.4, 330.8, 360.2, 381.9, 408.1, 430.8, 453.7, 469.2, 475.8, 590.9, 609.0, 617.6, 622.1, 637.9, 658.6, 685.4, 706.5, 728.5, 745.2, 808.5, 833.4, 841.9, 867.4, 883.9, 890.8, 912.6, 989.3, 1026.9, 1038.6, 1068.2, 1087.9, 1117.0, 1184.0, 1208.0, 1220.0, 1269.7, 1275.1, 1291.6, 1328.0, 1365.0, 1438.2, 1498.2, 1560.4, 1583.2, 1596.7, 1845.5, 3096.9, 3100.4, 3109.0, 3117.9 |
| IM6-c   | 0.5999<br>0.1400<br>0.1284 | 17.2, 35.7, 58.3, 108.5, 122.5, 160.7, 187.5, 194.8, 204.4, 237.0, 249.7, 257.6, 295.2, 316.2, 340.5, 375.2, 385.6, 424.7, 437.7, 459.0, 471.7, 548.7, 593.9, 605.5, 617.7, 628.6, 642.7, 660.5, 692.8, 708.1, 748.2, 822.2, 830.8, 837.2, 873.6, 875.7, 908.8, 925.5, 952.2, 1018.7, 1035.8, 1060.1, 1079.4, 1108.3, 1163.3, 1204.8, 1213.7, 1241.7, 1264.1, 1285.1, 1313.5, 1325.0, 1362.2, 1431.0, 1545.6, 1569.2, 1575.1, 1621.5, 2960.0, 3096.9, 3103.3, 3109.1, 3117.8          |
| TS6-c-1 | 0.6545<br>0.1343<br>0.1298 | <b>347.1i</b> , 36.5, 43.7, 59.3, 100.6, 155.4, 167.0, 192.6, 198.5, 202.2, 230.3, 264.1, 266.2, 291.1, 302.0, 344.4, 380.2, 401.4, 417.2, 434.5, 461.3, 489.4, 541.7, 563.5, 600.7, 607.9, 627.3, 658.8, 668.8, 702.3, 725.2, 762.9, 801.7, 836.2, 847.9, 877.9, 894.4, 914.4, 951.3, 991.6, 1020.8, 1044.7, 1083.3, 1120.8, 1146.6, 1195.7, 1214.4, 1235.3, 1264.2, 1309.1, 1339.1, 1349.4, 1373.0, 1431.6, 1539.4, 1548.8, 1575.7, 1586.8, 3019.6, 3072.1, 3079.0, 3104.5, 3116.9  |
| P6-c-1  | 0.6783<br>0.1324<br>0.1260 | 26.3, 38.0, 53.8, 82.8, 93.5, 143.7, 162.1, 178.7, 191.2, 197.5, 202.0, 227.9, 264.1, 290.7, 322.0, 336.8, 366.3, 394.7, 420.4, 446.6, 61.2, 477.0, 516.2, 557.5, 580.5, 599.5, 616.9, 643.0, 671.5, 711.0, 736.8, 751.2, 780.6, 795.9, 860.8, 877.4, 889.3, 905.6, 912.2, 986.7, 1017.8, 1031.4, 1093.5, 1151.4, 1187.3, 1207.9, 1216.7, 1239.5, 1263.9, 1298.6, 1339.8, 1384.7, 1434.4, 1477.0, 1526.6, 1536.1, 1569.5, 1696.3, 3059.1, 3060.4, 3080.3, 3103.5, 3112.4              |
| TS6-c-2 | 0.6002<br>0.1361<br>0.1350 | <b>316.3i</b> , 28.0, 34.9, 55.2, 81.7, 132.9, 155.4, 186.3, 193.1, 197.1, 215.3, 236.5, 270.4, 294.3, 311.3, 324.7, 358.9, 396.2, 420.6, 428.2, 448.4, 480.5, 535.2, 577.9, 591.6, 617.7, 628.2, 631.5, 660.6, 668.8, 682.4, 720.8, 745.2, 812.3, 819.1, 842.8, 883.1, 897.3, 918.8, 927.2, 963.3, 1035.6, 1073.8, 1087.6, 1130.3, 1188.3, 1205.4, 1259.5, 1266.5, 1304.9, 1313.3, 1376.7, 1426.0, 1525.5, 1560.3, 1579.5, 1584.1, 1610.7, 2941.0, 3098.1, 3100.5, 3117.3, 3186.1    |
| P6-c-2  | 0.5212<br>0.1577<br>0.1337 | 9.2, 24.5, 38.3, 57.1, 86.0, 112.6, 141.6, 159.5, 179.9, 188.3, 203.6, 206.3, 255.5, 283.2, 303.7, 326.7, 339.9, 376.5, 423.4, 450.5, 470.0, 507.2, 517.7, 589.0, 592.6, 609.1, 632.8, 640.8, 653.8, 663.6, 687.1, 706.8, 732.3, 772.6, 816.8, 839.6, 865.9, 888.2, 916.1, 920.6, 980.8, 1005.0, 1074.5, 1087.5, 1144.0, 1181.7, 1202.0, 1229.7, 1276.9, 1301.2, 1313.4, 1386.3, 1426.7, 1561.1, 1587.0, 1604.6, 1658.0, 1737.2, 2944.8,                                              |

|         |                            |                                                                                                                                                                                                                                                                                                                                                                                                                                                                                        |
|---------|----------------------------|----------------------------------------------------------------------------------------------------------------------------------------------------------------------------------------------------------------------------------------------------------------------------------------------------------------------------------------------------------------------------------------------------------------------------------------------------------------------------------------|
|         |                            | 3083.6, 3105.6, 3118.6, 3192.7                                                                                                                                                                                                                                                                                                                                                                                                                                                         |
| TS6-c-3 | 0.4790<br>0.1524<br>0.1457 | <b>270.0i</b> , 27.2, 31.0, 46.2, 98.4, 143.5, 169.9, 189.3, 196.5, 199.0, 203.8, 264.6, 283.1, 311.0, 326.5, 342.7, 360.0, 389.5, 400.0, 419.1, 451.6, 485.2, 531.2, 588.8, 603.6, 614.1, 621.9, 631.1, 643.4, 668.9, 710.5, 772.5, 811.5, 840.1, 845.0, 854.5, 867.6, 935.0, 972.6, 988.6, 1029.9, 1040.4, 1078.7, 1167.7, 1185.1, 1190.8, 1228.0, 1248.4, 1257.4, 1292.7, 1309.9, 1330.7, 1401.5, 1447.6, 1513.0, 1551.4, 1578.8, 1610.7, 2959.2, 3095.3, 3098.3, 3103.9, 3106.7    |
| P6-c-3  | 0.4589<br>0.1794<br>0.1446 | 31.3, 32.8, 57.9, 71.9, 132.3, 153.1, 181.5, 195.9, 197.0, 216.2, 260.2, 290.2, 306.3, 334.7, 347.1, 366.6, 375.1, 415.4, 429.8, 486.8, 515.5, 559.1, 573.0, 592.4, 632.1, 640.7, 653.3, 681.1, 719.4, 746.1, 759.5, 798.4, 840.7, 857.8, 876.4, 905.4, 939.1, 991.0, 1008.0, 1053.2, 1082.7, 1096.0, 1166.4, 1183.8, 1195.5, 1211.1, 1217.1, 1255.5, 1274.4, 1283.6, 1318.3, 1336.5, 1360.2, 1406.3, 1442.5, 1562.1, 1587.3, 1633.3, 2923.2, 2986.7, 3106.8, 3110.4, 3118.8           |
| TS6-d   | 0.7020<br>0.1297<br>0.1147 | <b>1636.8i</b> , 38.8, 46.4, 79.2, 121.0, 129.9, 176.4, 186.8, 195.7, 211.2, 226.1, 247.9, 253.8, 301.9, 336.5, 354.0, 385.0, 398.9, 427.4, 456.0, 465.5, 509.7, 566.8, 591.8, 616.4, 622.6, 640.1, 646.6, 695.9, 703.6, 727.3, 759.8, 828.6, 837.2, 845.7, 868.1, 885.1, 897.6, 912.3, 1001.9, 1037.0, 1064.8, 1084.4, 1128.9, 1136.3, 1157.7, 1186.6, 1210.7, 1223.1, 1271.1, 1299.9, 1330.1, 1367.6, 1415.8, 1436.7, 1563.6, 1586.3, 1638.6, 1891.7, 3042.6, 3101.7, 3109.8, 3119.2 |
| IM6-d   | 0.7395<br>0.1288<br>0.1132 | 37.2, 48.1, 82.0, 97.8, 124.2, 169.5, 180.9, 195.6, 205.8, 208.8, 236.3, 250.4, 279.6, 311.2, 330.1, 349.5, 377.2, 397.6, 428.9, 446.2, 476.2, 559.2, 567.1, 596.4, 617.8, 642.7, 652.3, 671.9, 695.0, 708.9, 734.9, 829.2, 837.9, 842.7, 874.8, 884.2, 896.2, 953.9, 1006.0, 1031.6, 1051.0, 1085.2, 1095.9, 1134.1, 1178.5, 1186.2, 1213.5, 1223.4, 1270.8, 1289.7, 1307.1, 1360.8, 1405.2, 1432.7, 1542.9, 1567.8, 1578.6, 1677.0, 2915.6, 3003.4, 3109.3, 3110.2, 3120.0           |
| TS6-d-1 | 0.7430<br>0.1277<br>0.1131 | <b>374.0i</b> , 39.4, 42.9, 67.6, 93.2, 132.3, 150.9, 177.7, 192.2, 194.8, 211.5, 249.1, 272.9, 302.4, 315.0, 362.2, 373.9, 392.6, 421.1, 430.9, 463.4, 471.4, 552.6, 577.2, 605.9, 613.9, 620.5, 647.2, 651.6, 681.8, 698.8, 728.4, 743.9, 824.5, 843.9, 865.8, 879.3, 892.2, 941.2, 987.9, 1010.3, 1073.1, 1083.1, 1111.0, 1130.4, 1170.4, 1183.3, 1210.0, 1271.8, 1296.7, 1359.8, 1400.4, 1419.3, 1422.6, 1463.6, 1562.2, 1574.5, 1613.5, 3006.0, 3090.0, 3101.9, 3106.6, 3116.6    |
| P6-d-1  | 0.7419<br>0.1135<br>0.1011 | 23.5, 31.9, 34.8, 71.4, 96.1, 115.4, 136.0, 169.9, 181.5, 194.3, 218.2, 220.7, 246.9, 285.3, 304.3, 351.1, 370.7, 402.0, 422.0, 426.1, 452.2, 494.2, 532.2, 587.1, 608.2, 612.5, 633.5, 665.8, 675.8, 679.8, 691.0, 732.8, 749.9, 799.0, 843.6, 864.3, 886.2, 900.4, 903.7, 933.4, 974.2, 1070.3, 1102.3, 1133.8, 1147.8, 1193.5, 1209.1, 1266.3, 1293.1, 1344.0, 1378.8, 1395.3, 1422.1, 1456.3, 1570.1, 1594.2, 1603.0, 1636.2, 3059.0, 3063.0, 3105.6, 3117.1, 3151.6               |
| TS6-d-2 | 0.7146                     | <b>331.6i</b> , 30.2, 44.1, 73.8, 93.6, 126.8, 169.2, 170.9, 193.4, 194.6, 197.1,                                                                                                                                                                                                                                                                                                                                                                                                      |

|        |                            |                                                                                                                                                                                                                                                                                                                                                                                                                                                                                     |
|--------|----------------------------|-------------------------------------------------------------------------------------------------------------------------------------------------------------------------------------------------------------------------------------------------------------------------------------------------------------------------------------------------------------------------------------------------------------------------------------------------------------------------------------|
|        | 0.1199<br>0.1075           | 233.0, 252.4, 301.0, 315.9, 340.3, 354.0, 369.0, 387.4, 416.4, 426.3, 484.2, 517.4, 564.9, 587.1, 602.1, 622.2, 639.7, 643.9, 666.8, 697.2, 723.3, 819.3, 848.9, 853.4, 877.4, 881.8, 921.4, 970.8, 1017.5, 1062.9, 1078.7, 1114.3, 1153.4, 1186.5, 1199.9, 1214.5, 1257.7, 1259.7, 1308.4, 1329.2, 1394.7, 1401.4, 1457.5, 1516.9, 1564.7, 1570.6, 1640.9, 2923.1, 3012.9, 3096.3, 3100.8, 3105.3                                                                                  |
| P6-d-2 | 0.7347<br>0.1040<br>0.1012 | 19.9, 22.1, 33.8, 71.1, 96.0, 107.1, 160.0, 170.7, 174.7, 192.7, 203.8, 242.6, 286.9, 295.6, 319.9, 343.5, 355.1, 367.4, 397.7, 417.9, 447.0, 512.9, 538.8, 548.1, 573.5, 596.3, 614.5, 632.9, 643.9, 653.3, 705.3, 743.2, 810.0, 846.6, 860.1, 888.5, 898.3, 933.9, 979.9, 1032.0, 1071.8, 1083.5, 1143.0, 1163.0, 1184.1, 1197.0, 1234.0, 1247.1, 1279.4, 1321.2, 1327.7, 1369.3, 1394.7, 1502.4, 1552.6, 1571.7, 1620.0, 1695.3, 2920.5, 2978.0, 3088.1, 3100.1, 3100.4          |
| TS6-e  | 0.6256<br>0.1261<br>0.1170 | <b>439.5i</b> , 29.4, 46.0, 62.0, 97.9, 151.4, 168.7, 184.0, 191.4, 194.3, 195.4, 226.5, 247.2, 290.9, 308.0, 337.7, 356.1, 371.3, 390.5, 416.7, 423.3, 442.8, 480.2, 537.0, 593.2, 609.3, 630.7, 638.0, 654.7, 668.1, 679.7, 707.8, 762.7, 818.0, 830.2, 847.6, 856.4, 869.1, 928.7, 968.9, 1073.8, 1082.9, 1109.6, 1158.9, 1183.2, 1193.3, 1199.1, 1222.3, 1255.2, 1261.6, 1324.3, 1326.8, 1391.7, 1424.3, 1475.6, 1525.2, 1541.9, 1562.5, 3085.7, 3097.6, 3102.2, 3109.0, 3673.3 |
| P6-e   | 0.6910<br>0.1059<br>0.1052 | 16.9, 21.0, 35.0, 86.8, 100.4, 152.6, 164.1, 171.0, 193.3, 202.4, 226.9, 255.6, 272.2, 281.1, 317.8, 332.8, 368.5, 373.6, 408.7, 417.9, 436.6, 452.1, 512.9, 545.0, 573.2, 603.2, 628.8, 633.5, 640.7, 661.2, 670.5, 727.7, 783.3, 808.5, 811.9, 843.8, 869.2, 880.9, 941.0, 977.9, 1083.4, 1097.7, 1118.4, 1172.7, 1192.3, 1208.9, 1231.4, 1244.5, 1269.9, 1285.8, 1328.6, 1361.6, 1395.6, 1467.6, 1503.3, 1564.7, 1572.3, 1584.3, 3082.5, 3085.9, 3098.9, 3112.5, 3716.0          |
